# Supplementary material for: On the Interactions of Fused Pyrazole Derivative with Selected Amino Acids: DFT Calculations
Source: Hindawi journal article supplement (doi:10.1155/2017/8124323), 2017-01-01
Supplement: f1 [file 8124323.f1.zip]

Archive with 2 entries (2 files):
- Czaja_JC_supplement_rev_JCHEM_1909624.doc
- Czaja_JC_supplement_rev_JCHEM_1909625.pdf
