# Supplementary material for: On the Interactions of Fused Pyrazole Derivative with Selected Amino Acids: DFT Calculations
Source: Hindawi journal article supplement (doi:10.1155/2017/8124323), 2017-01-01
Supplement: f1 [file 8124323.f1.zip › Czaja_JC_supplement_rev_JCHEM_1909625.pdf]

# On the interactions of fused pyrazole derivative with selected aminoacids – DFT calculations

Kornelia Czaja<sup>1</sup>, Jacek Kujawski<sup>\*1</sup>, Elżbieta Jodłowska-Siewert<sup>1</sup>, Paulina Szulc<sup>1</sup>, Tomasz Ratajczak<sup>2</sup>, Dominika Krygier<sup>3</sup>, Marcin K. Chmielewski<sup>3</sup>, Marek K. Bernard<sup>1</sup>

<sup>1</sup>Department of Organic Chemistry, Faculty of Pharmacy, Poznan University of Medical Sciences, Grunwaldzka 6 street, 60-780 Poznań, Poland

<sup>2</sup>Centre of New Technologies, University of Warsaw, Banacha 2C, 02-097, Warsaw, Poland

<sup>3</sup>Institute of Bioorganic Chemistry, Polish Academy of Sciences, Z. Noskowskiego str. 12/14, 61-704 Poznań, Poland

\*corresponding author: jacekkuj@ump.edu.pl, phone 486185466701, fax 48618546680

## Table of Contents:

|                                                                                      |    |
|--------------------------------------------------------------------------------------|----|
| Figure S1. Structure of the 7-alanine adduct 7AlaB optimized .....                   | 7  |
| Figure S2. Structure of the 7-alanine adduct 7AlaM optimized .....                   | 8  |
| Figure S3. Structure of the 7-alanine adduct 7AlaB-N optimized .....                 | 9  |
| Figure S4. Structure of the 7-lysine adduct 7LysB optimized .....                    | 10 |
| Figure S5. Structure of the 7-lysine adduct 7LysP-N optimized .....                  | 11 |
| Figure S6. Structure of the 7-lysine adduct 7LysP- $\alpha$ N optimized .....        | 12 |
| Figure S7. Structure of the 7-glutamic acid adduct 7GluB6 optimized .....            | 13 |
| Figure S8. Structure of the 7-glutamic acid adduct 7GluB- $\alpha$ N optimized ..... | 14 |
| Figure S9. Structure of the 7-glutamic acid adduct 7GluB-C optimized .....           | 15 |
| Figure S10. Structure of the 7-methionine adduct 7MetB6 optimized .....              | 16 |
| Figure S11. Structure of the 7-methionine adduct 7MetB- $\alpha$ N optimized .....   | 17 |
| Figure S12. Hydrogen bond parameters within the 7-alanine adduct 7AlaB .....         | 18 |
| Figure S13. Hydrogen bond parameters within the 7-alanine adduct 7AlaM .....         | 19 |
| Figure S14. Hydrogen bond parameters within the 7-lysine adduct 7LysB .....          | 20 |
| Figure S15. Hydrogen bond parameters within the 7-lysine adduct 7LysP .....          | 21 |
| Figure S16. Hydrogen bond parameters within the 7-glutamic acid adduct 7GluB .....   | 22 |
| Figure S17. Hydrogen bond parameters within the 7-glutamic acid adduct 7GluB6 .....  | 23 |
| Figure S18. Hydrogen bond parameters within the 7-methionine adduct 7MetB .....      | 24 |

|                                                                                                                                                                     |    |
|---------------------------------------------------------------------------------------------------------------------------------------------------------------------|----|
| Figure S19. Hydrogen bond parameters within the 7–methionine adduct 7MetB6 .....                                                                                    | 25 |
| Table S1. Values of electron densities ( $\rho$ ) and Laplacian fields ( $\nabla^2\rho$ ) (in $\text{e}\text{\AA}$ ) of the hydrogen-bonded 7–Ala adducts.....      | 26 |
| Table S2. Values of electron densities ( $\rho$ ) and Laplacian fields ( $\nabla^2\rho$ ) (in $\text{e}\text{\AA}$ ) of the hydrogen-bonded 7–Glu adducts.....      | 26 |
| Table S3. Values of electron densities ( $\rho$ ) and Laplacian fields ( $\nabla^2\rho$ ) (in $\text{e}\text{\AA}$ ) of the hydrogen-bonded 7–Met adducts .....     | 26 |
| Table S4. Experimental ( $\delta_{\text{exp}}$ ) and calculated chemical shifts (rotamers 7AlaB –7AlaB <sub>c</sub> ) for compound 7 within the 7–Ala adduct .....  | 27 |
| Table S5. Experimental ( $\delta_{\text{exp}}$ ) and calculated chemical shifts (rotamers 7AlaB6–7AlaB6 <sub>c</sub> ) for compound 7 within the 7–Ala adduct ..... | 27 |
| Table S6. Experimental ( $\delta_{\text{exp}}$ ) and calculated chemical shifts (rotamers 7AlaC–7AlaC <sub>c</sub> ) for compound 7 within the 7–Ala adduct .....   | 28 |
| Table S7. Experimental ( $\delta_{\text{exp}}$ ) and calculated chemical shifts (rotamers 7AlaP –7AlaP <sub>c</sub> ) for compound 7 within the 7–Ala adduct .....  | 28 |
| Table S8. Experimental ( $\delta_{\text{exp}}$ ) and calculated chemical shifts (rotamers 7AlaM –7AlaM <sub>c</sub> ) for compound 7 within the 7–Ala adduct .....  | 29 |
| Table S9. Experimental ( $\delta_{\text{exp}}$ ) and calculated chemical shifts (rotamers 7LysB –7LysB <sub>c</sub> ) for compound 7 within the 7–Lys adduct.....   | 29 |
| Table S10. Experimental ( $\delta_{\text{exp}}$ ) and calculated chemical shifts (rotamers 7LysB6–7LysB6 <sub>c</sub> ) for compound 7 within the 7–Lys adduct..... | 30 |
| Table S11. Experimental ( $\delta_{\text{exp}}$ ) and calculated chemical shifts (rotamers 7LysC –7LysC <sub>c</sub> ) for compound 7 within the 7–Lys adduct.....  | 30 |
| Table S12. Experimental ( $\delta_{\text{exp}}$ ) and calculated chemical shifts (rotamers 7LysM –7LysM <sub>c</sub> ) for compound 7 within the 7–Lys adduct.....  | 31 |
| Table S13. Experimental ( $\delta_{\text{exp}}$ ) and calculated chemical shifts (rotamers 7GluB –7GluB <sub>c</sub> ) for compound 7 within the 7–Glu adduct.....  | 31 |
| Table S14. Experimental ( $\delta_{\text{exp}}$ ) and calculated chemical shifts (rotamers 7GluB6–7GluB6 <sub>c</sub> ) for compound 7 within the 7–Glu adduct..... | 32 |
| Table S15. Experimental ( $\delta_{\text{exp}}$ ) and calculated chemical shifts (rotamers 7GluC –7GluC <sub>c</sub> ) for compound 7 within the 7–Glu adduct.....  | 32 |
| Table S16. Experimental ( $\delta_{\text{exp}}$ ) and calculated chemical shifts (rotamers 7GluP –7GluP <sub>c</sub> ) for compound 7 within the 7–Glu adduct.....  | 33 |
| Table S17. Experimental ( $\delta_{\text{exp}}$ ) and calculated chemical shifts (rotamers 7GluM –7GluM <sub>c</sub> ) for compound 7 within the 7–Glu adduct.....  | 33 |

|                                                                                                                                                                      |    |
|----------------------------------------------------------------------------------------------------------------------------------------------------------------------|----|
| Table S18. Experimental ( $\delta_{\text{exp}}$ ) and calculated chemical shifts (rotamers 7MetB –7MetB <sub>c</sub> ) for compound 7 within the 7–Met adduct .....  | 34 |
| Table S19. Experimental ( $\delta_{\text{exp}}$ ) and calculated chemical shifts (rotamers 7MetB6–7MetB6 <sub>c</sub> ) for compound 7 within the 7–Met adduct ..... | 34 |
| Table S20. Experimental ( $\delta_{\text{exp}}$ ) and calculated chemical shifts (rotamers 7MetC –7MetC <sub>c</sub> ) for compound 7 within the 7–Met adduct .....  | 35 |
| Table S21. Experimental ( $\delta_{\text{exp}}$ ) and calculated chemical shifts (rotamers 7MetP –7MetP <sub>c</sub> ) for compound 7 within the 7–Met adduct .....  | 35 |
| Table S22. Experimental ( $\delta_{\text{exp}}$ ) and calculated chemical shifts (rotamers 7MetM –7MetM <sub>c</sub> ) for compound 7 within the 7–Met adduct .....  | 36 |
| Table S23. Hydrogen bonding within the 7–aminoacid adducts .....                                                                                                     | 37 |
| Cartesian coordinates: .....                                                                                                                                         | 38 |
| Adduct 7AlaB:.....                                                                                                                                                   | 38 |
| Adduct 7AlaB <sub>a</sub> : .....                                                                                                                                    | 39 |
| Adduct 7AlaB <sub>b</sub> : .....                                                                                                                                    | 40 |
| Adduct 7AlaB <sub>c</sub> : .....                                                                                                                                    | 41 |
| Adduct 7AlaB6:.....                                                                                                                                                  | 42 |
| Adduct 7AlaB6 <sub>a</sub> : .....                                                                                                                                   | 43 |
| Adduct 7AlaB6 <sub>b</sub> : .....                                                                                                                                   | 44 |
| Adduct 7AlaB6 <sub>c</sub> : .....                                                                                                                                   | 45 |
| Adduct 7AlaC:.....                                                                                                                                                   | 46 |
| Adduct 7AlaC <sub>a</sub> :.....                                                                                                                                     | 47 |
| Adduct 7AlaC <sub>b</sub> :.....                                                                                                                                     | 48 |
| Adduct 7AlaC <sub>c</sub> : .....                                                                                                                                    | 49 |
| Adduct 7AlaP: .....                                                                                                                                                  | 50 |
| Adduct 7AlaP <sub>a</sub> :.....                                                                                                                                     | 51 |
| Adduct 7AlaP <sub>b</sub> :.....                                                                                                                                     | 52 |
| Adduct 7AlaP <sub>c</sub> :.....                                                                                                                                     | 53 |

|                              |    |
|------------------------------|----|
| Adduct 7AlaM:                | 54 |
| Adduct 7AlaM <sub>a</sub> :  | 55 |
| Adduct 7AlaM <sub>b</sub> :  | 56 |
| Adduct 7AlaM <sub>c</sub> :  | 57 |
| Adduct 7LysB:                | 58 |
| Adduct 7LysB <sub>a</sub> :  | 59 |
| Adduct 7LysB <sub>b</sub> :  | 61 |
| Adduct 7LysB <sub>c</sub> :  | 62 |
| Adduct 7LysB6:               | 63 |
| Adduct 7LysB6 <sub>a</sub> : | 64 |
| Adduct 7LysB6 <sub>b</sub> : | 66 |
| Adduct 7LysB6 <sub>c</sub> : | 67 |
| Adduct 7LysC:                | 68 |
| Adduct 7LysC <sub>a</sub> :  | 70 |
| Adduct 7LysC <sub>b</sub> :  | 71 |
| Adduct 7LysC <sub>c</sub> :  | 72 |
| Adduct 7LysP:                | 73 |
| Adduct 7LysP <sub>a</sub> :  | 75 |
| Adduct 7LysP <sub>b</sub> :  | 76 |
| Adduct 7LysP <sub>c</sub> :  | 77 |
| Adduct 7LysM:                | 78 |
| Adduct 7LysM <sub>a</sub> :  | 80 |
| Adduct 7LysM <sub>b</sub> :  | 81 |
| Adduct 7LysM <sub>c</sub> :  | 82 |
| Adduct 7GluB:                | 84 |

|                              |     |
|------------------------------|-----|
| Adduct 7GluB <sub>a</sub> :  | 85  |
| Adduct 7GluB <sub>b</sub> :  | 86  |
| Adduct 7GluB <sub>c</sub> :  | 87  |
| Adduct 7GluB <sub>6</sub> :  | 88  |
| Adduct 7GluB <sub>6a</sub> : | 89  |
| Adduct 7GluB <sub>6b</sub> : | 90  |
| Adduct 7GluB <sub>6c</sub> : | 92  |
| Adduct 7GluC:                | 93  |
| Adduct 7GluC <sub>a</sub> :  | 94  |
| Adduct 7GluC <sub>b</sub> :  | 95  |
| Adduct 7GluC <sub>c</sub> :  | 96  |
| Adduct 7GluP:                | 97  |
| Adduct 7GluP <sub>a</sub> :  | 99  |
| Adduct 7GluP <sub>b</sub> :  | 100 |
| Adduct 7GluP <sub>c</sub> :  | 101 |
| Adduct 7GluM:                | 102 |
| Adduct 7GluM <sub>a</sub> :  | 103 |
| Adduct 7GluM <sub>b</sub> :  | 104 |
| Adduct 7GluM <sub>c</sub> :  | 105 |
| Adduct 7MetB:                | 107 |
| Adduct 7MetB <sub>a</sub> :  | 108 |
| Adduct 7MetB <sub>b</sub> :  | 109 |
| Adduct 7MetB <sub>c</sub> :  | 110 |
| Adduct 7MetB <sub>6</sub> :  | 111 |
| Adduct 7MetB <sub>6a</sub> : | 113 |

|                              |     |
|------------------------------|-----|
| Adduct 7MetB6 <sub>b</sub> : | 114 |
| Adduct 7MetB6 <sub>c</sub> : | 115 |
| Adduct 7MetC:                | 116 |
| Adduct 7MetC <sub>a</sub> :  | 117 |
| Adduct 7MetC <sub>b</sub> :  | 118 |
| Adduct 7MetC <sub>c</sub> :  | 120 |
| Adduct 7MetP:                | 121 |
| Adduct 7MetP <sub>a</sub> :  | 122 |
| Adduct 7MetP <sub>b</sub> :  | 123 |
| Adduct 7MetP <sub>c</sub> :  | 124 |
| Adduct 7MetM:                | 125 |
| Adduct 7MetM <sub>a</sub> :  | 127 |
| Adduct 7MetM <sub>b</sub> :  | 128 |
| Adduct 7MetM <sub>c</sub> :  | 129 |
| Adduct 7AlaB-N:              | 130 |
| Adduct 7LysP-N:              | 131 |
| Adduct 7GluB- $\alpha$ N:    | 132 |
| Adduct 7MetB- $\alpha$ N:    | 134 |
| Adduct 7LysP- $\alpha$ N:    | 135 |
| Adduct 7GluB-C:              | 136 |

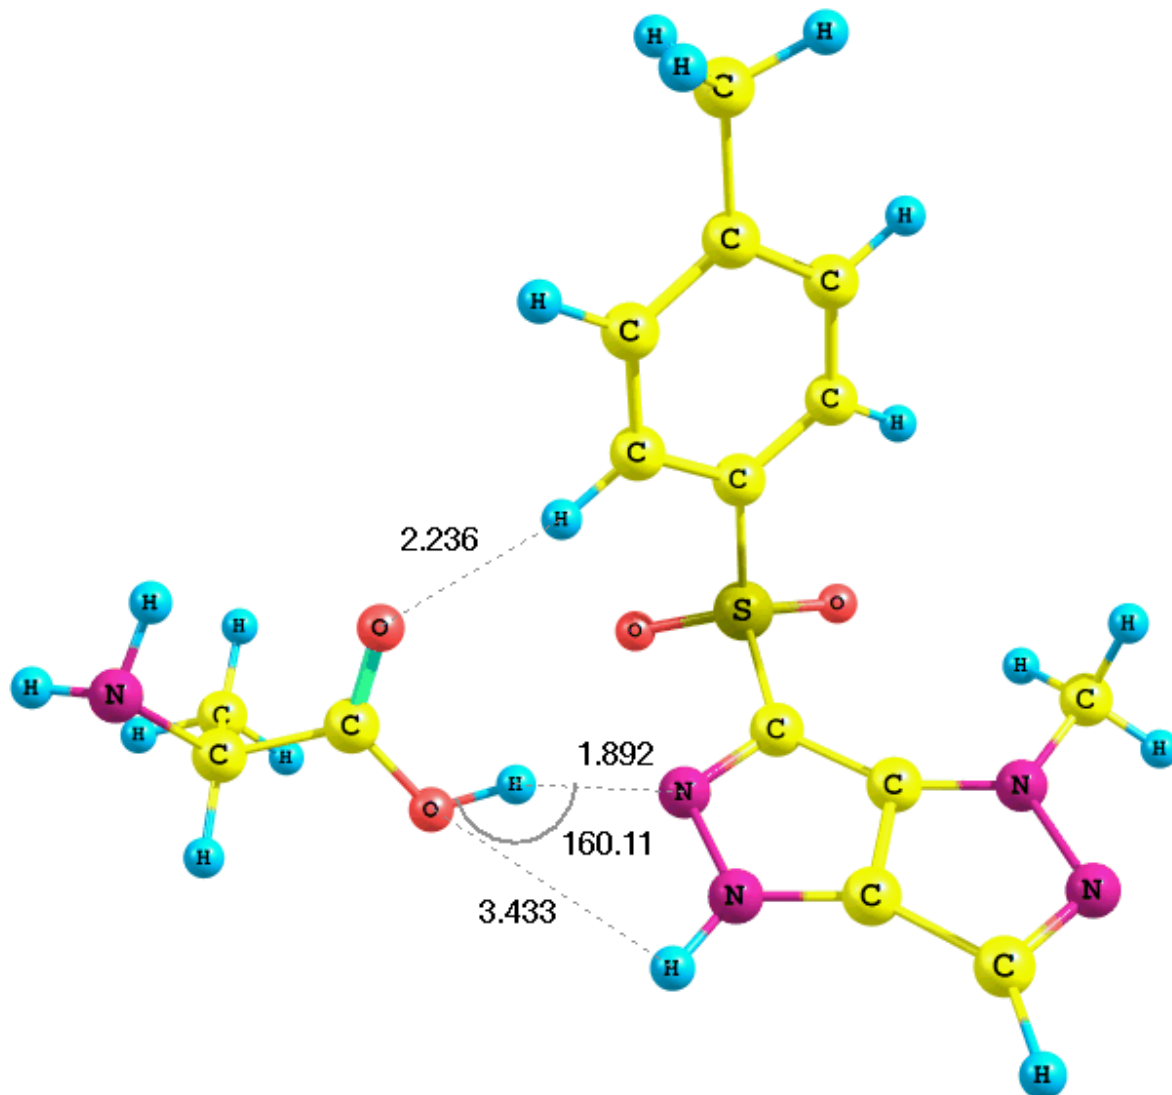

**Figure S1.** Structure of the 7-alanine adduct **7AlaB** optimized at the B3LYP/6-31G(d,p) level of theory.

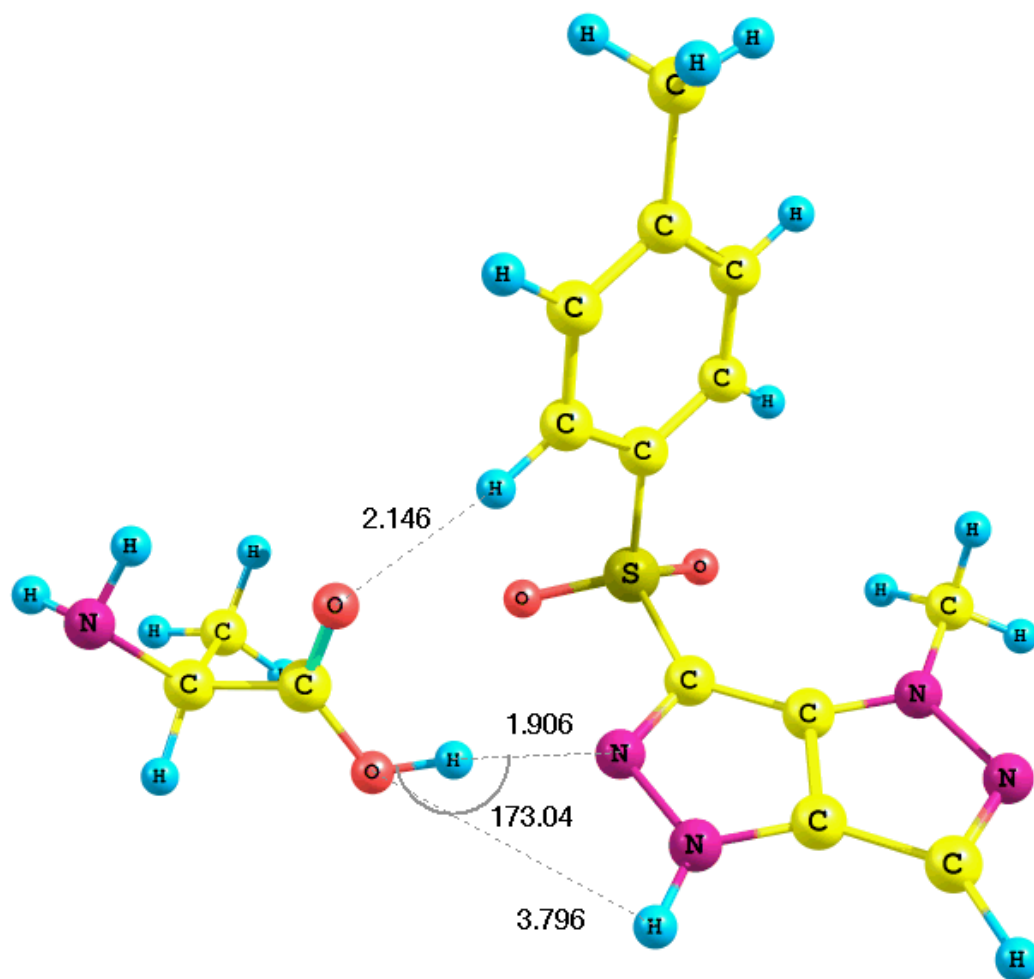

**Figure S2.** Structure of the 7-alanine adduct **7AlaM** optimized at the M06L/6-31G(d,p) level of theory.

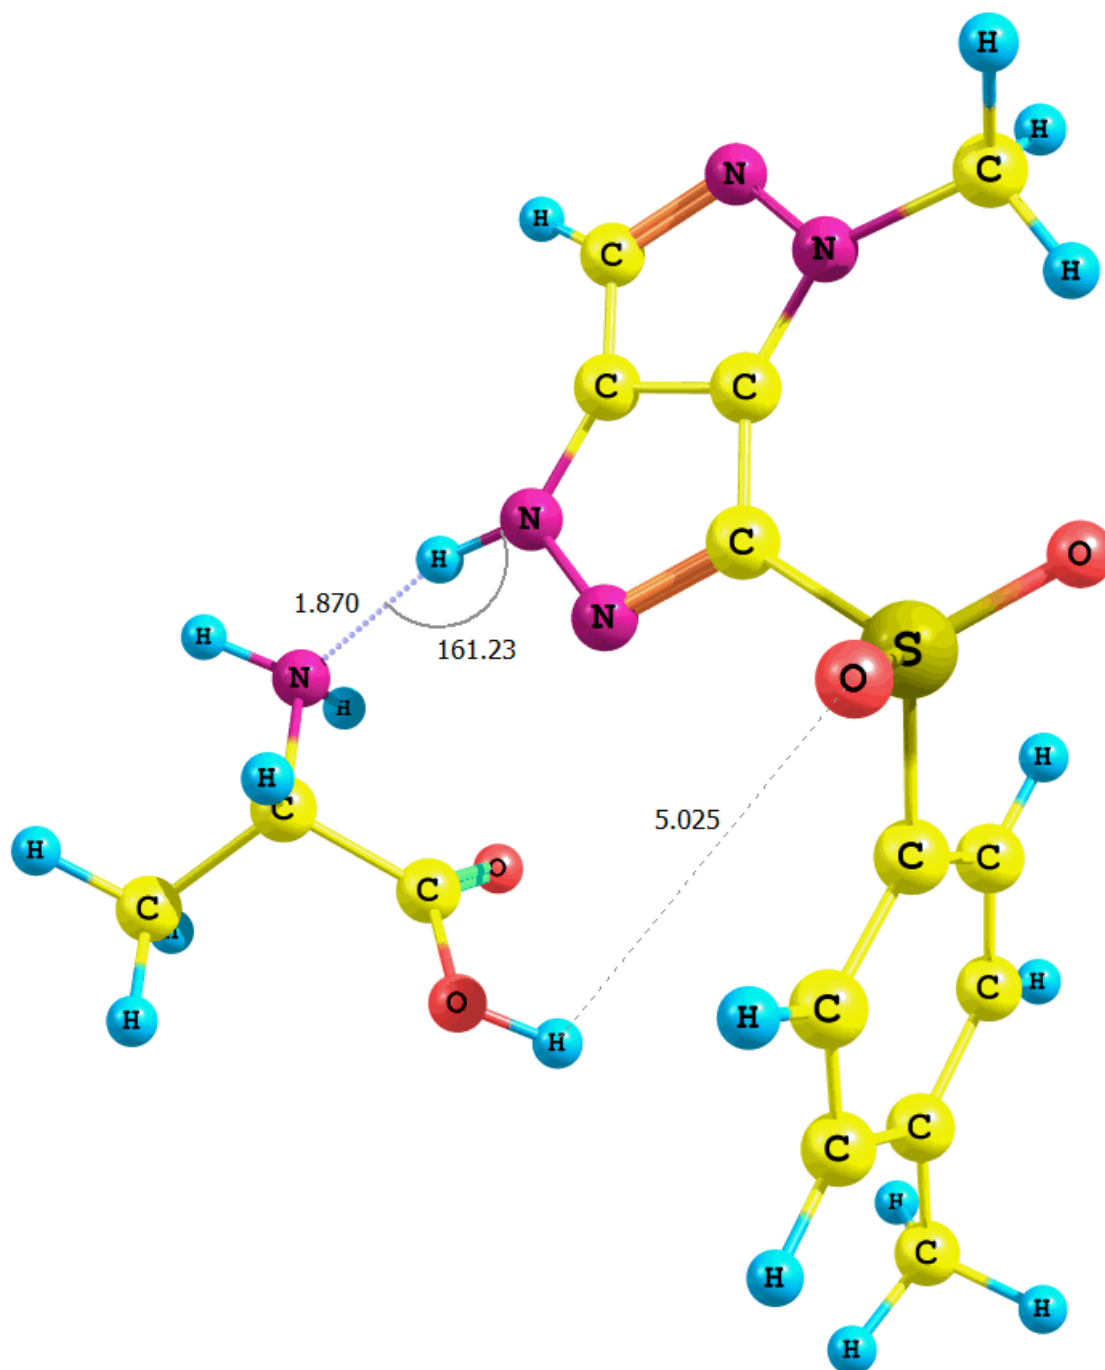

**Figure S3.** Structure of the 7-alanine adduct **7AlaB-N** optimized at the B3LYP/6-31G(d,p) level of theory.

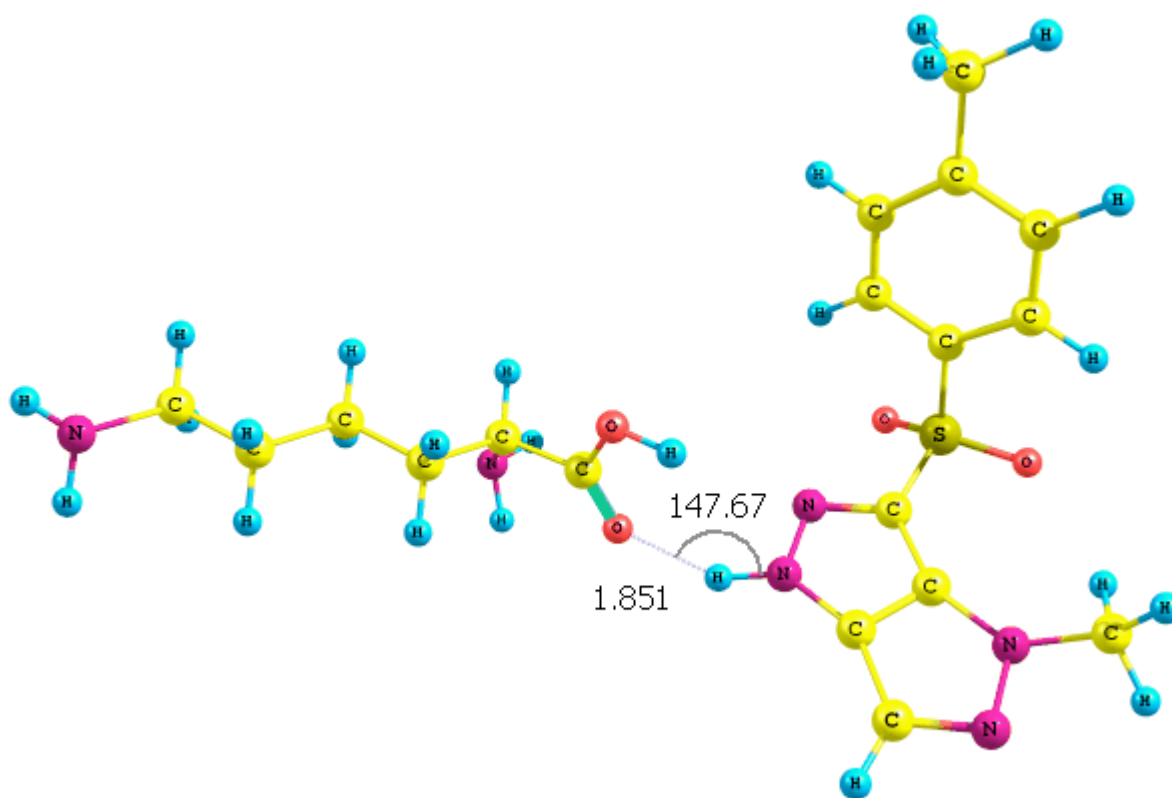

**Figure S4.** Structure of the 7-lysine adduct **7LysB** optimized at the B3LYP/6-31G(d,p) level of theory.

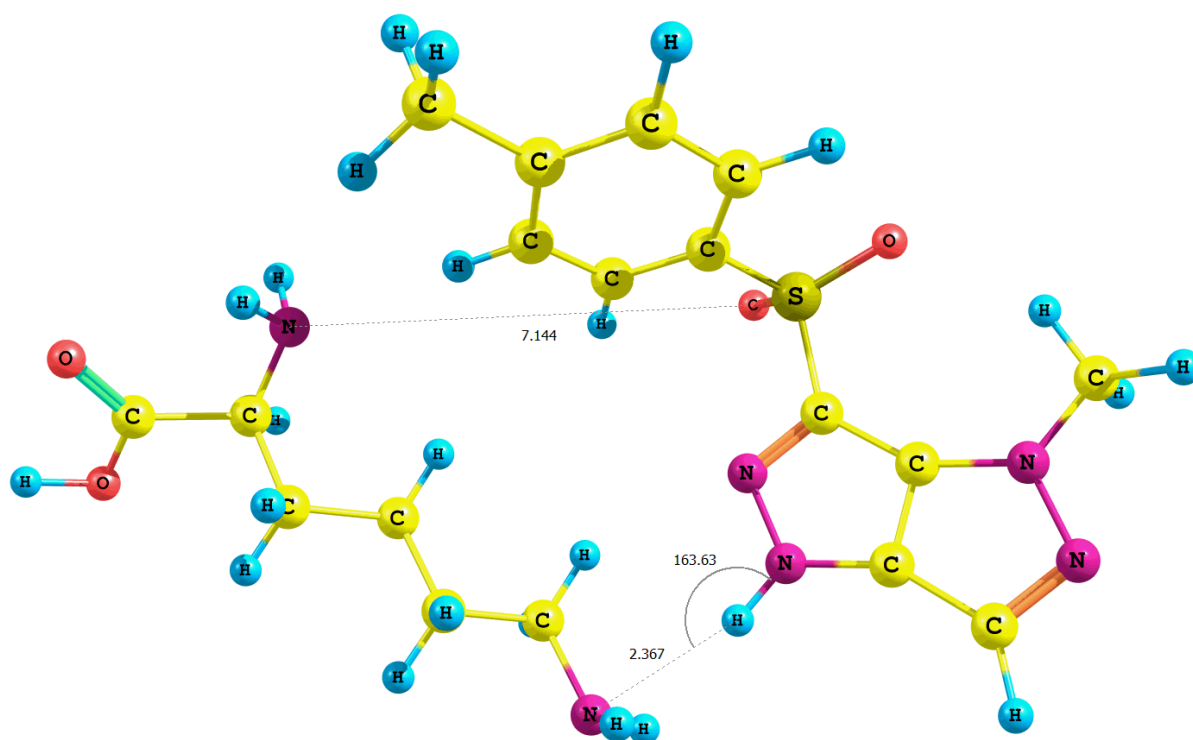

**Figure S5.** Structure of the 7-lysine adduct **7LysP-N** optimized at the B3LYP/6-31G(d,p) level of theory.

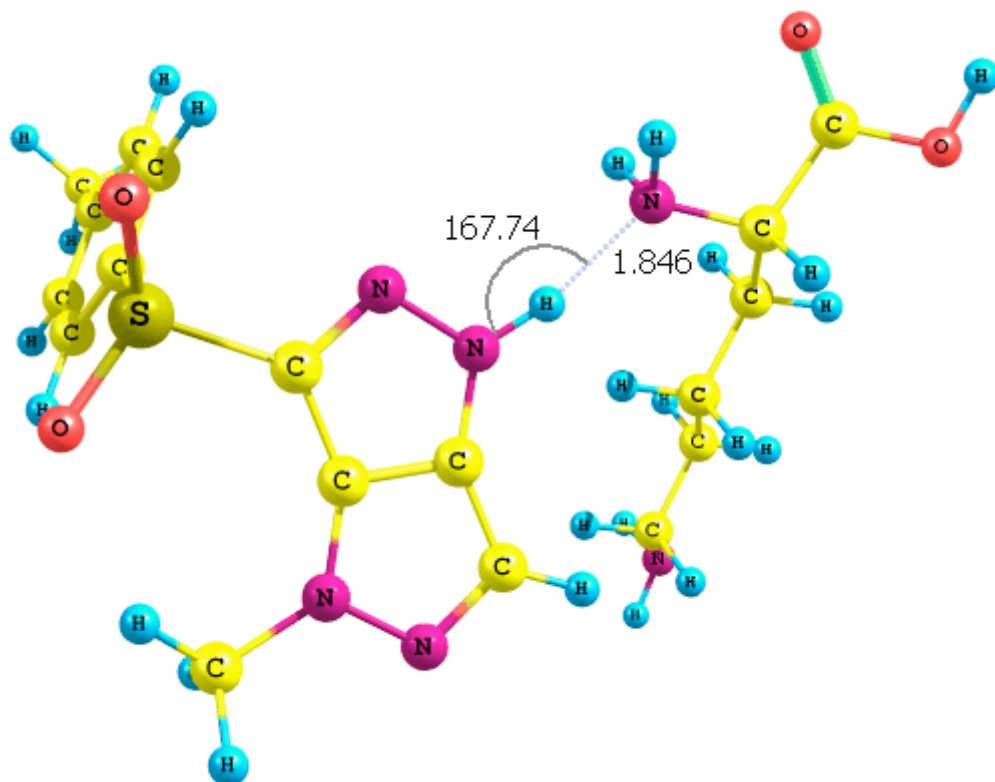

**Figure S6.** Structure of the 7-lysine adduct **7LysP- $\alpha$ N** optimized at the PBE1PBE/6-31G(d,p) level of theory.

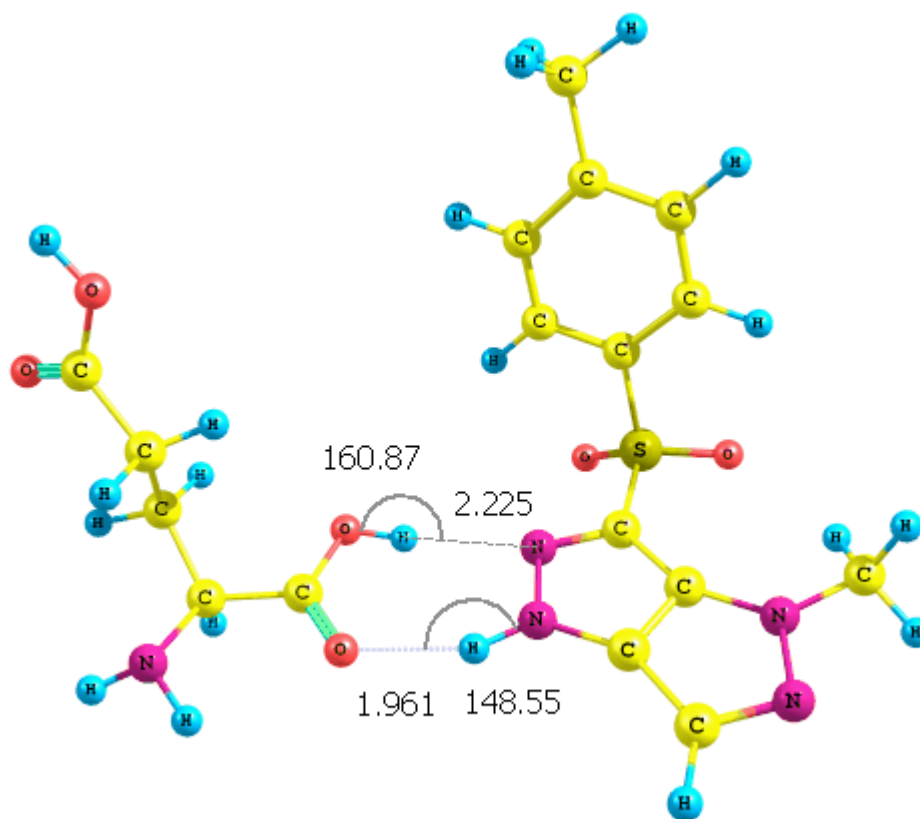

**Figure S7.** Structure of the 7-glutamic acid adduct **7GluB6** optimized at the B3LYP/6-311+G(d,p) level of theory.

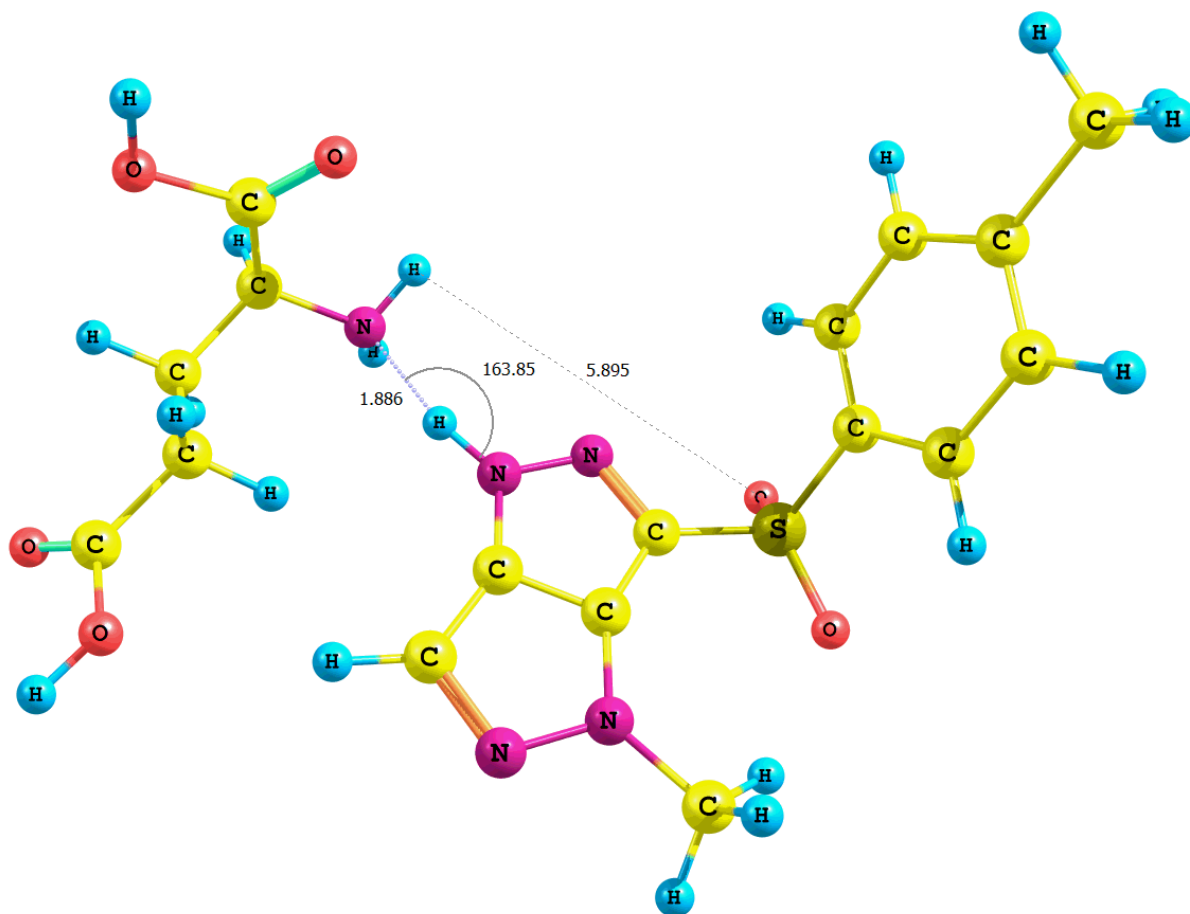

**Figure S8.** Structure of the 7-glutamic acid adduct **7GluB- $\alpha$ N** optimized at the B3LYP/6-31G(d,p) level of theory.

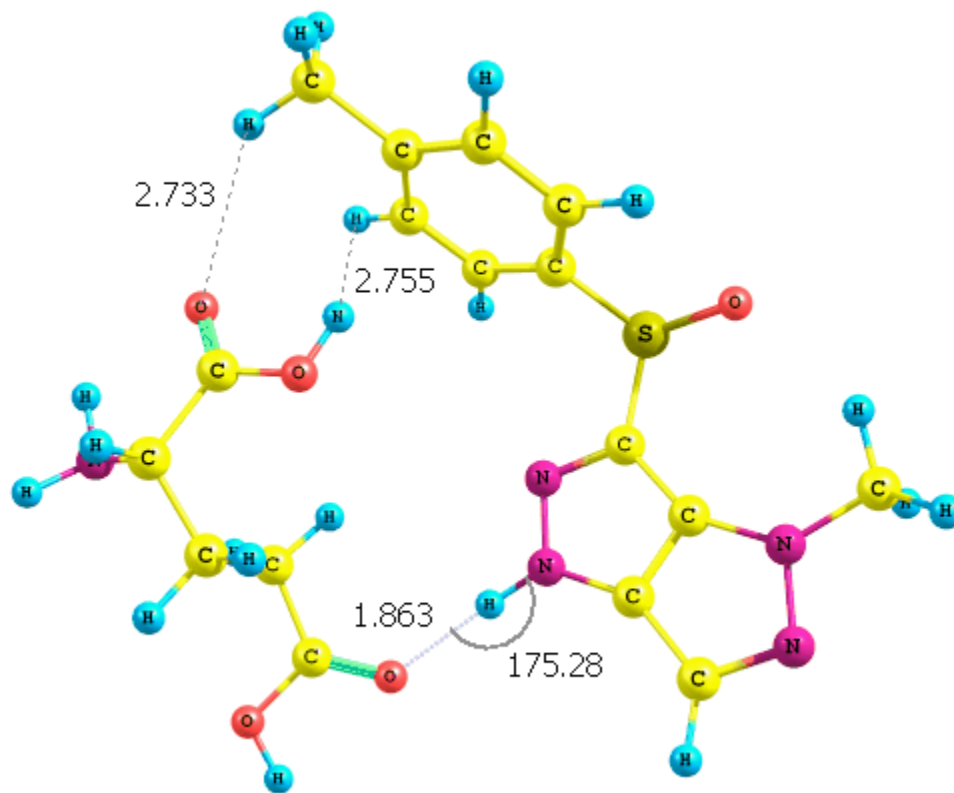

**Figure S9.** Structure of the 7-glutamic acid adduct **7GluB-C** optimized at the B3LYP/6-31G(d,p) level of theory.

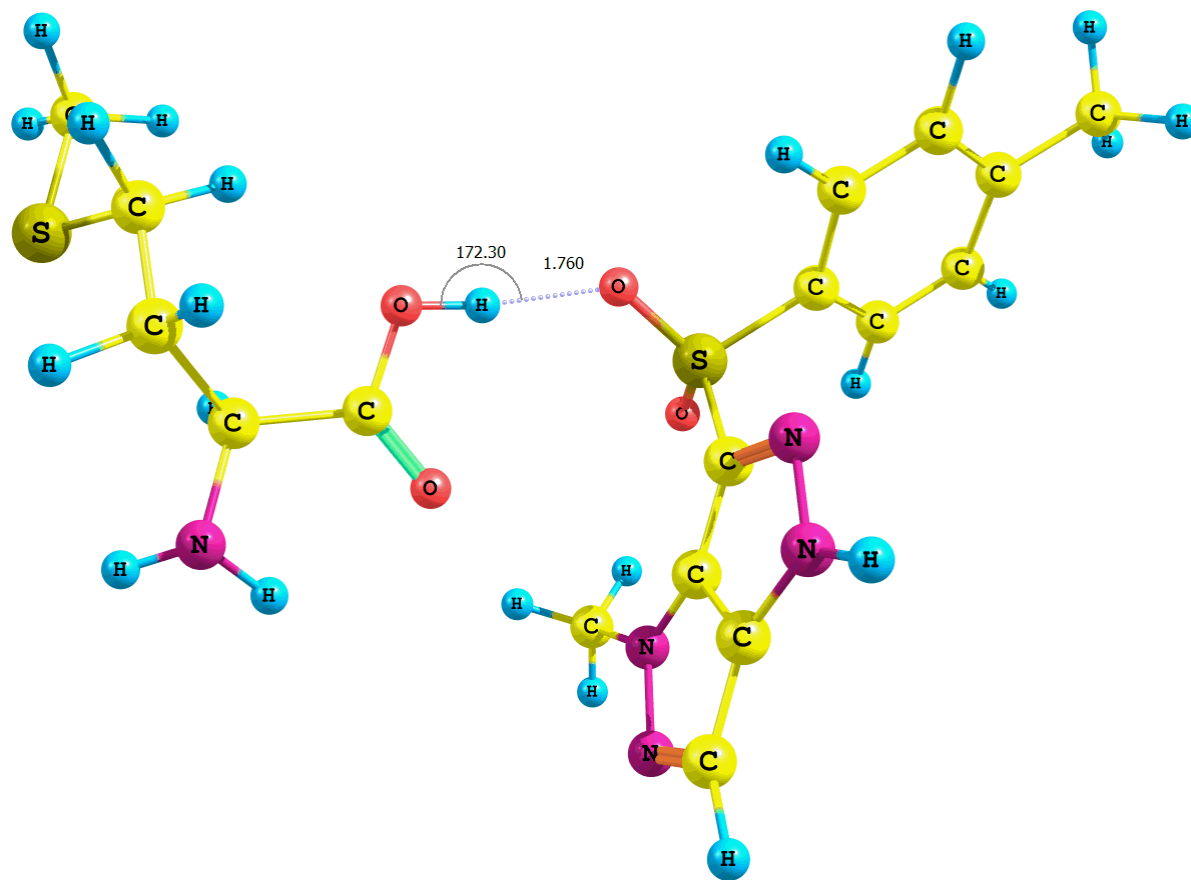

**Figure S10.** Structure of the 7-methionine adduct **7MetB6** optimized at the B3LYP/6-311+G(d,p) level of theory.

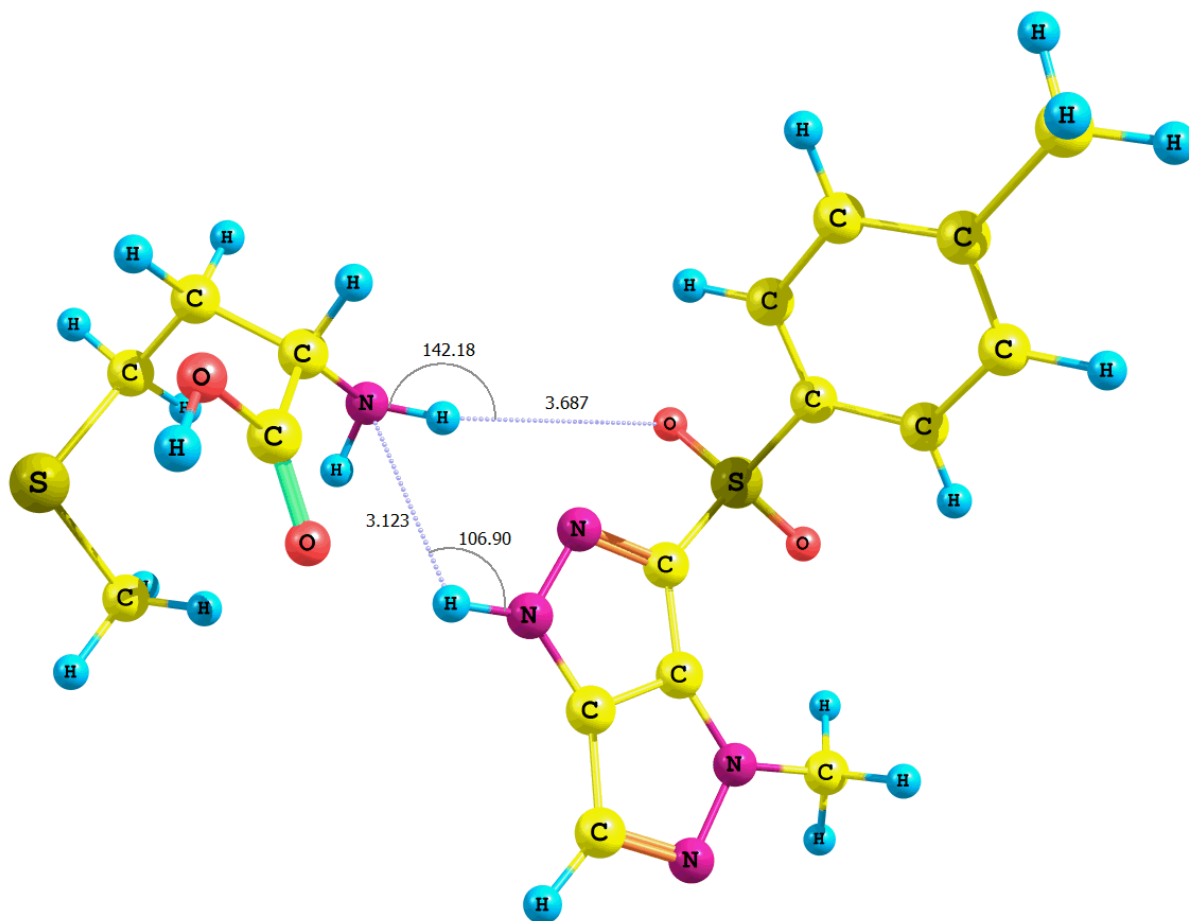

**Figure S11.** Structure of the 7-methionine adduct **7MetB- $\alpha$ N** optimized at the B3LYP/6-31G(d,p) level of theory.

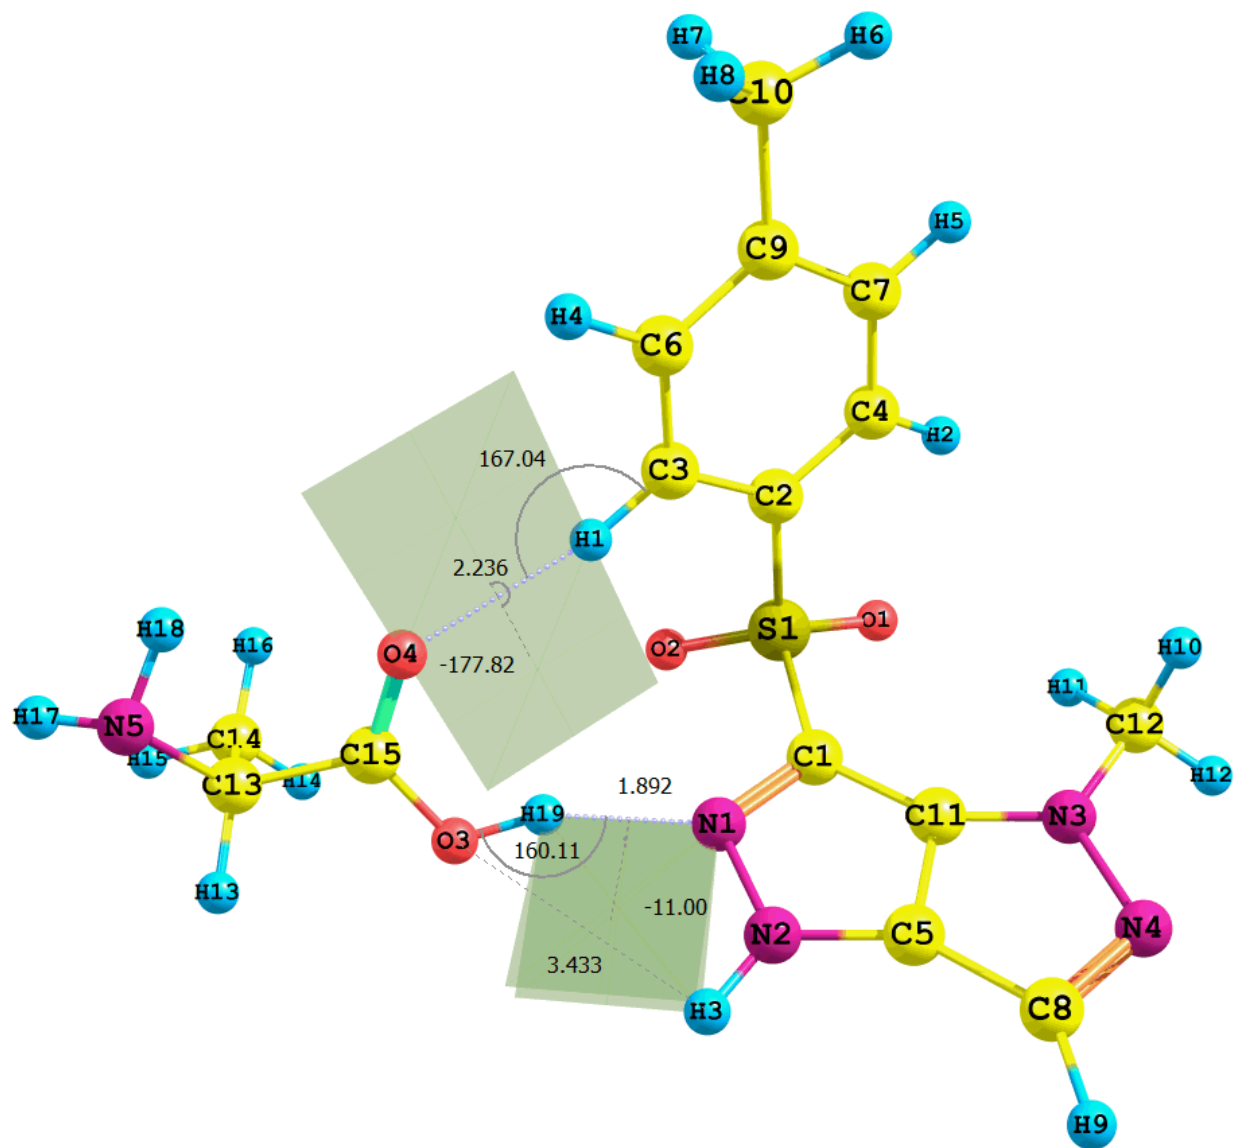

**Figure S12.** Hydrogen bond parameters within the 7-alanine adduct **7AlaB**, interaction energy  $E = -9.36$  ( $-8.77$ ) kcal/mole,  $J_{\text{H-N}} = -2.05$  Hz,  $J_{\text{H-O}} = 1.39$  Hz.

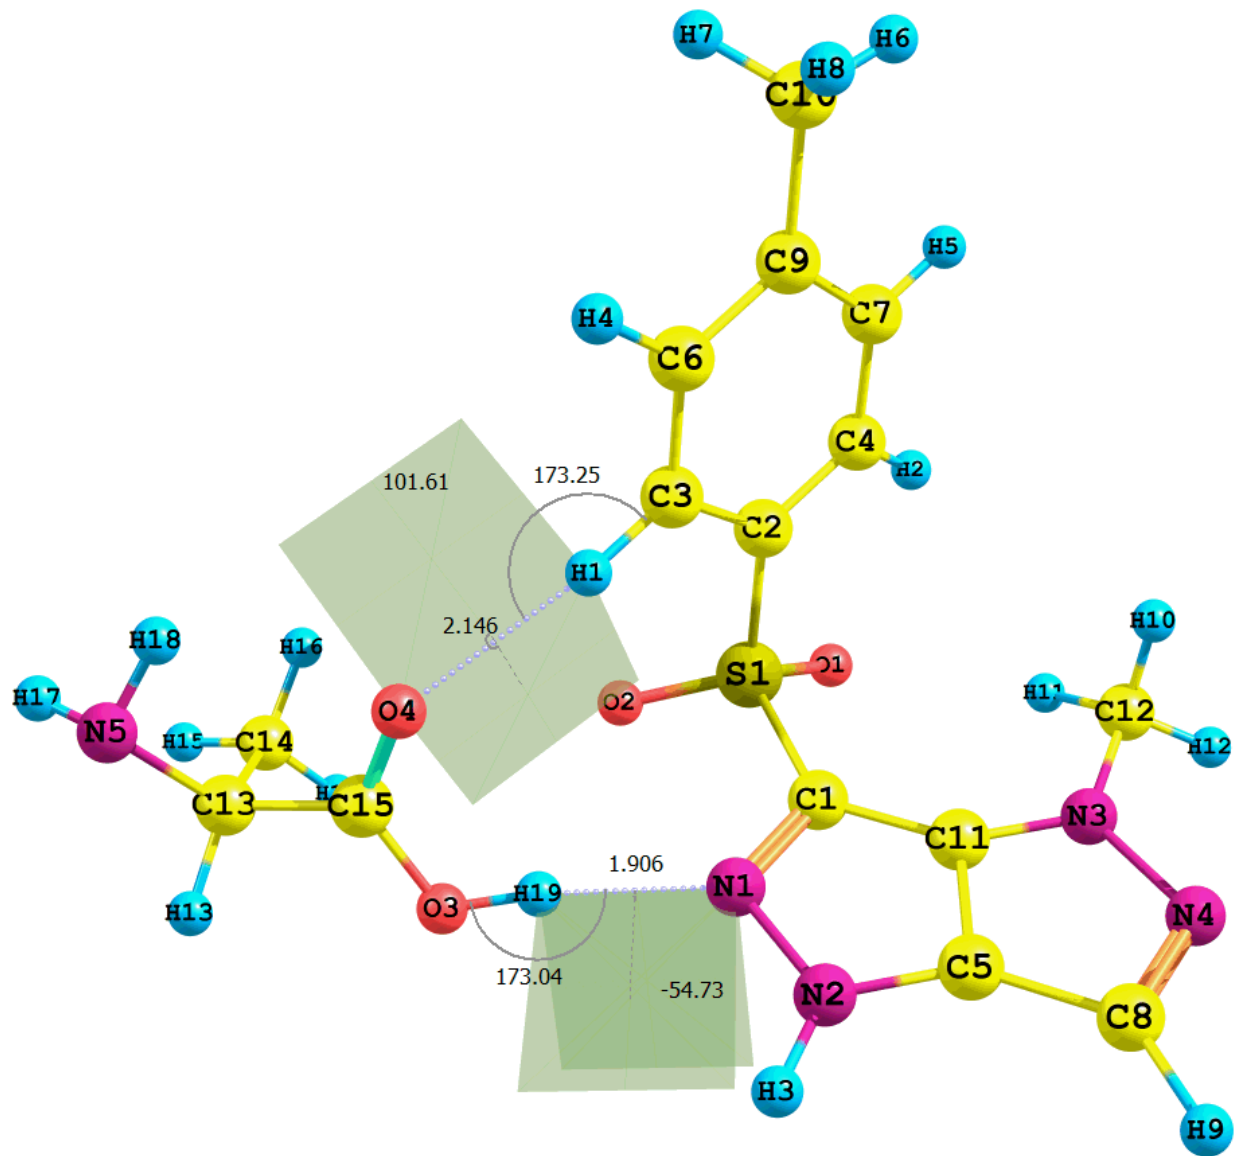

**Figure S13.** Hydrogen bond parameters within the 7-alanine adduct **7AlaM**, interaction energy  $E = -8.56$  ( $-8.07$ ) kcal/mole,  $J_{\text{H-N}} = -2.16$  Hz,  $J_{\text{H-O}} = 2.24$  Hz.

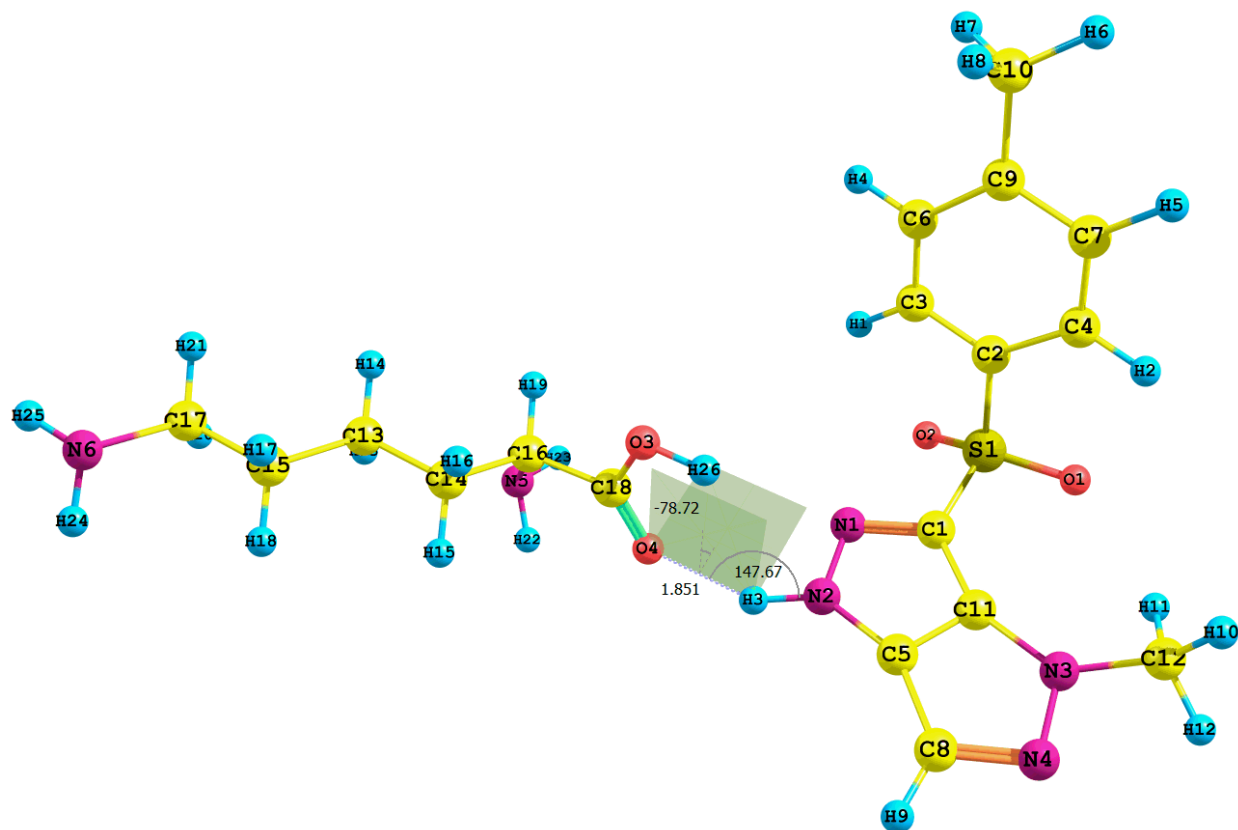

**Figure S14.** Hydrogen bond parameters within the 7-lysine adduct **7LysB**, interaction energy  $E = -5.11$  ( $-4.73$ ) kcal/mole,  $J_{\text{H-O}} = 5.16$  Hz.

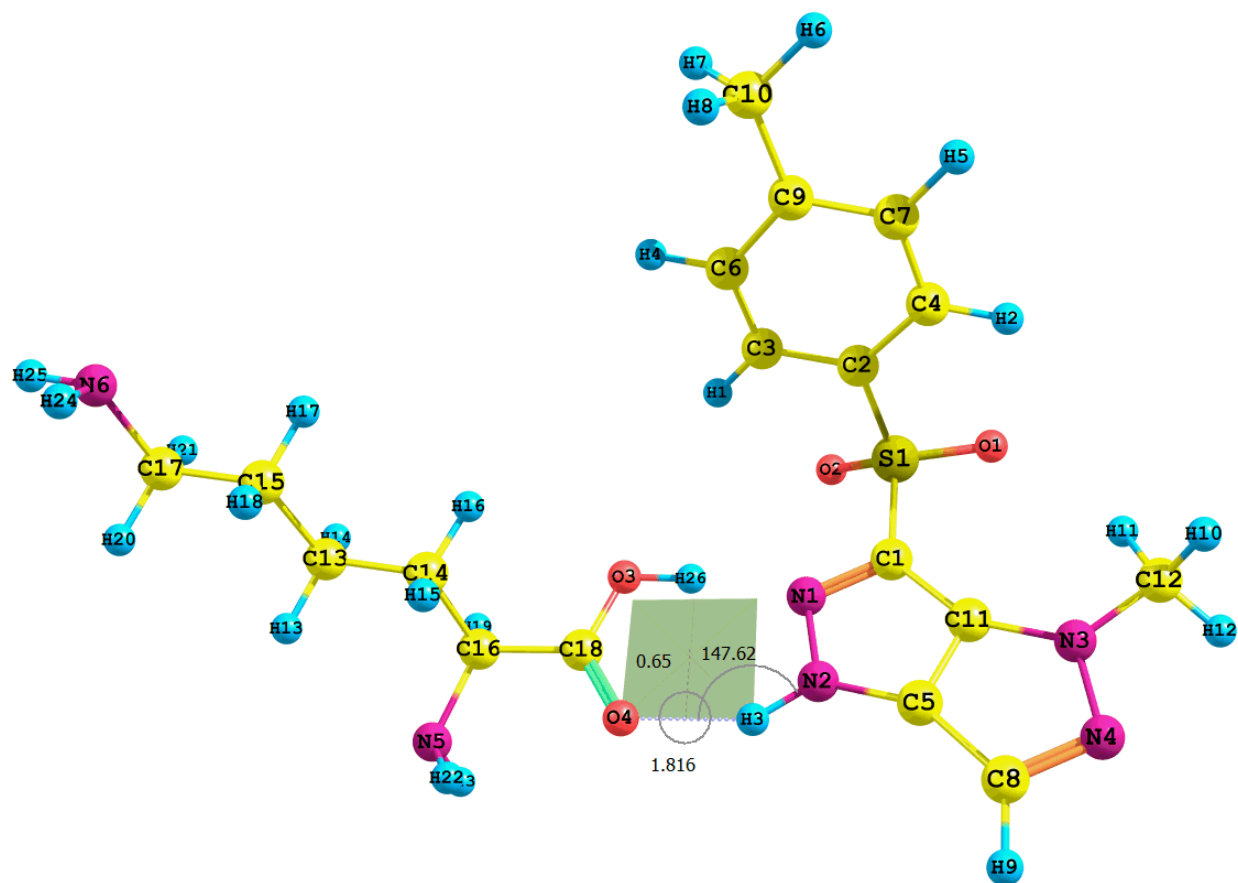

**Figure S15.** Hydrogen bond parameters within the 7-lysine adduct **7LysP**, interaction energy  $E = -15.96$  ( $-15.06$ ) kcal/mole,  $J_{\text{H-O}} = 5.78$  Hz.

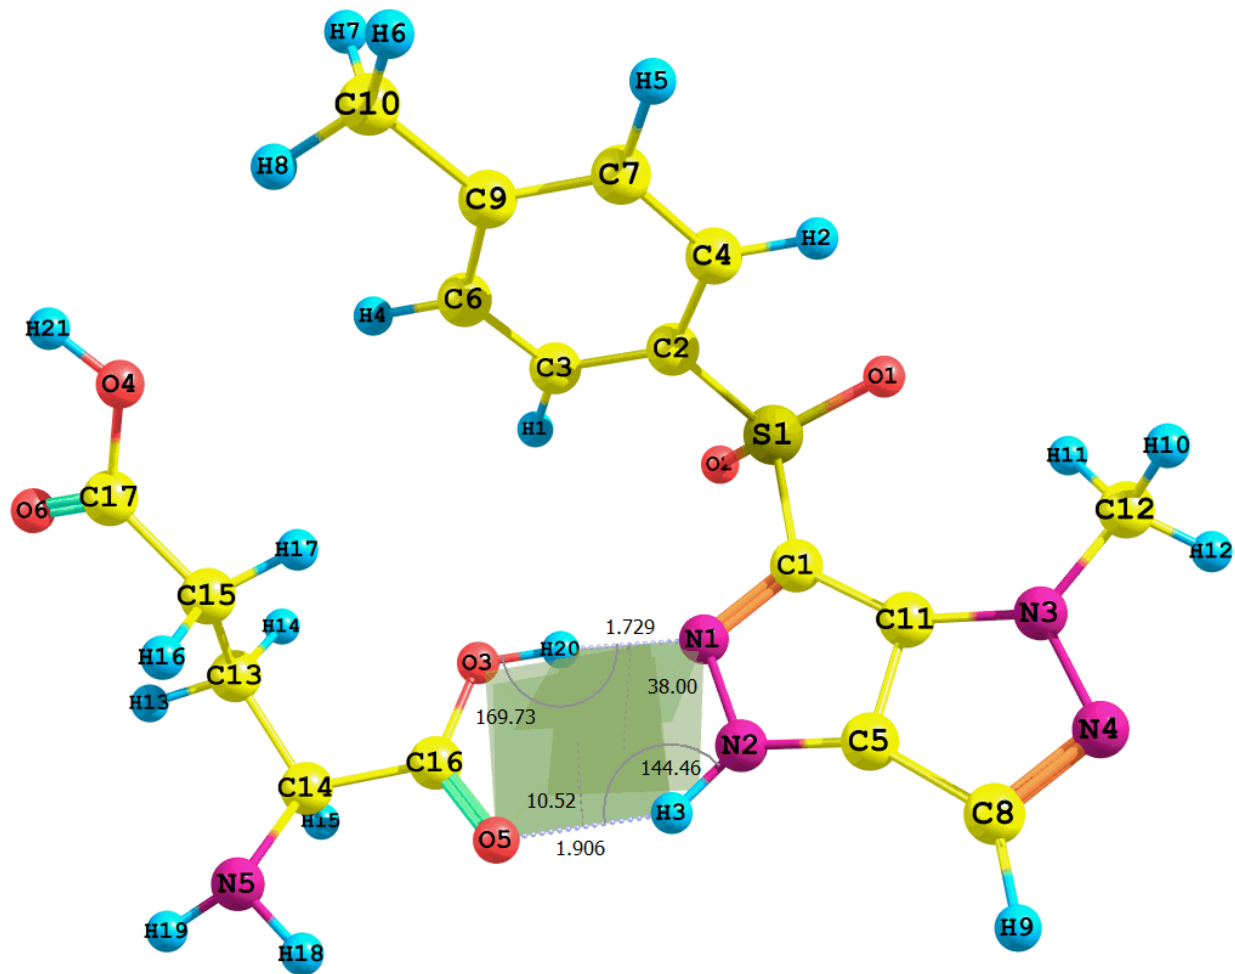

**Figure S16.** Hydrogen bond parameters within the 7-glutamic acid adduct **7GluB**, interaction energy  $E = -15.88$  ( $-14.85$ ) kcal/mole,  $J_{\text{H-O}} = 4.56$  Hz,  $J_{\text{H-N}} = -1.18$  Hz.

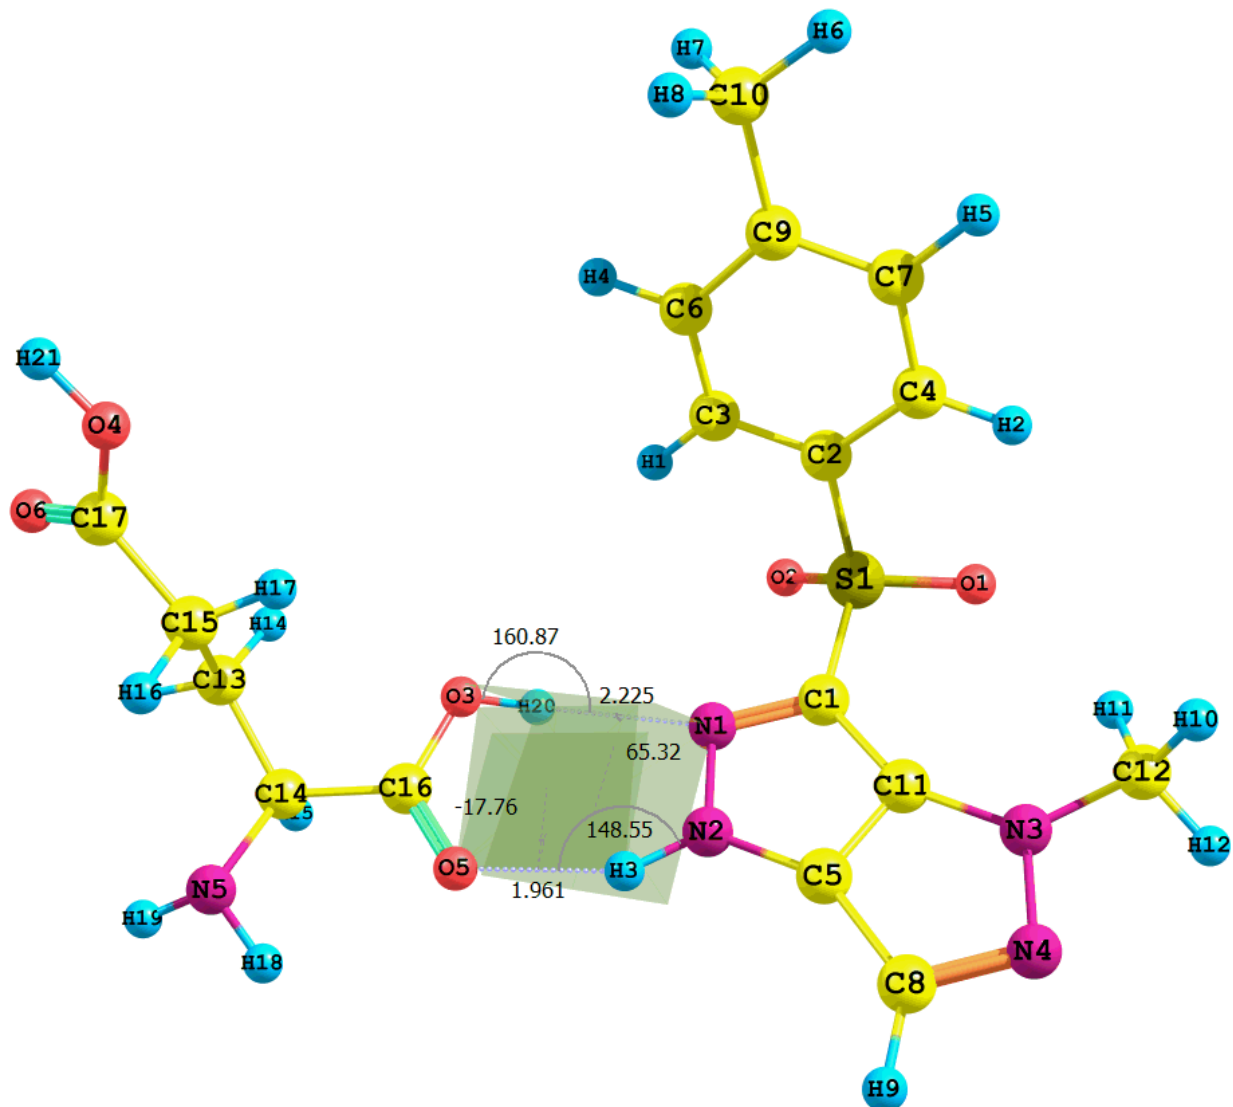

**Figure S17.** Hydrogen bond parameters within the 7-glutamic acid adduct **7GluB6**, interaction energy  $E = -10.90$  ( $-9.97$ ) kcal/mole,  $J_{\text{H-O}} = 4.17$  Hz,  $J_{\text{H-N}} = -9.38$  Hz.

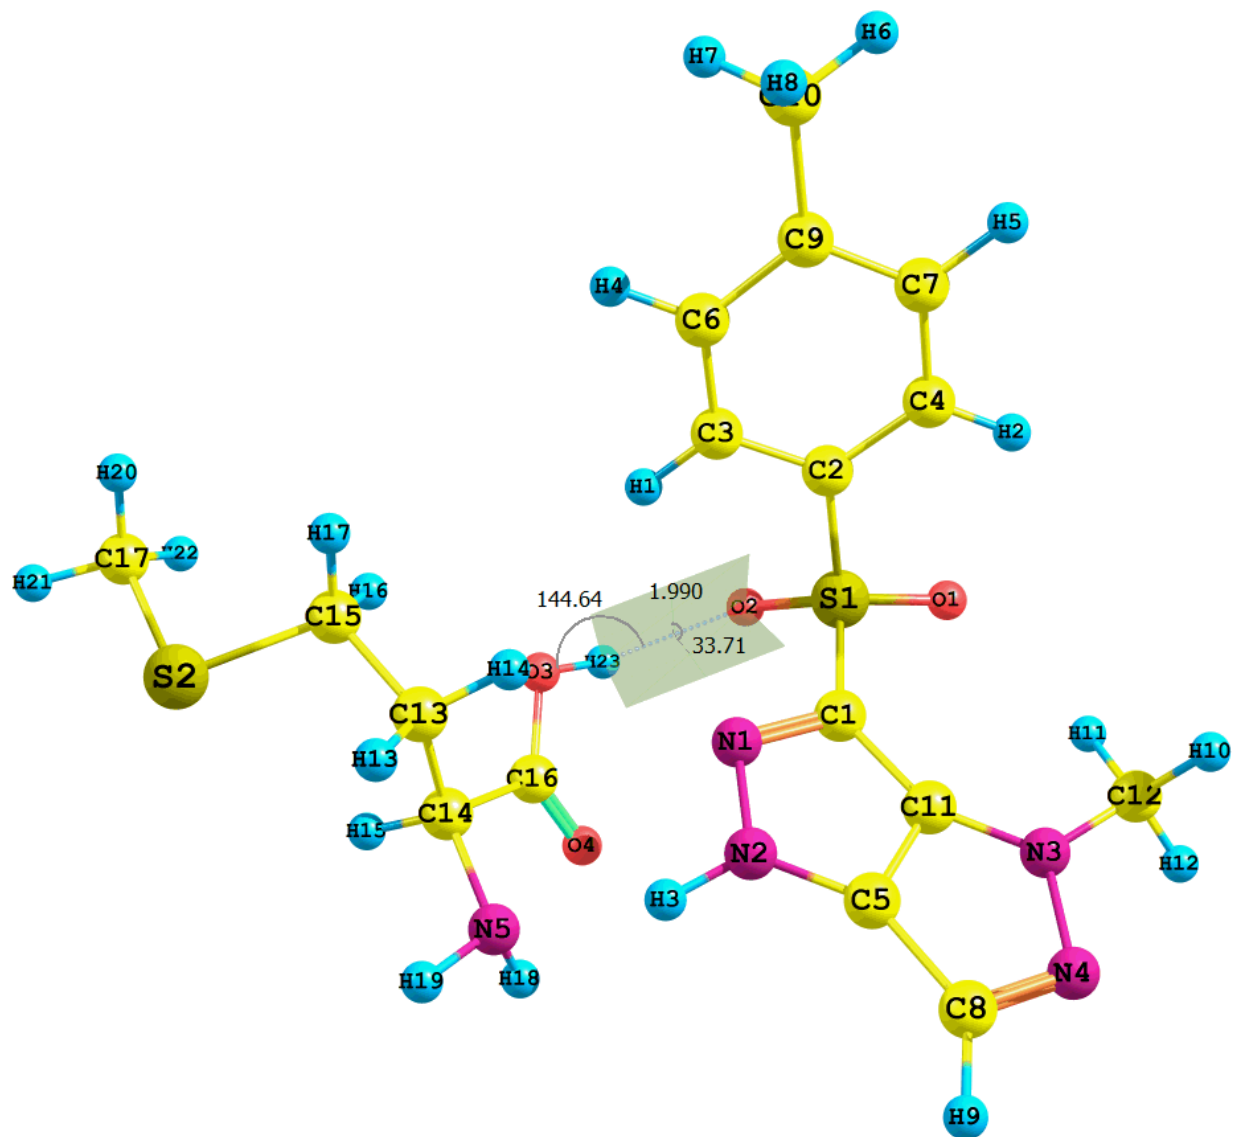

**Figure S18.** Hydrogen bond parameters within the 7-methionine adduct **7MetB**, interaction energy  $E = -13.69$  ( $-11.67$ ) kcal/mole,  $J_{\text{H-O}} = 4.03$  Hz.

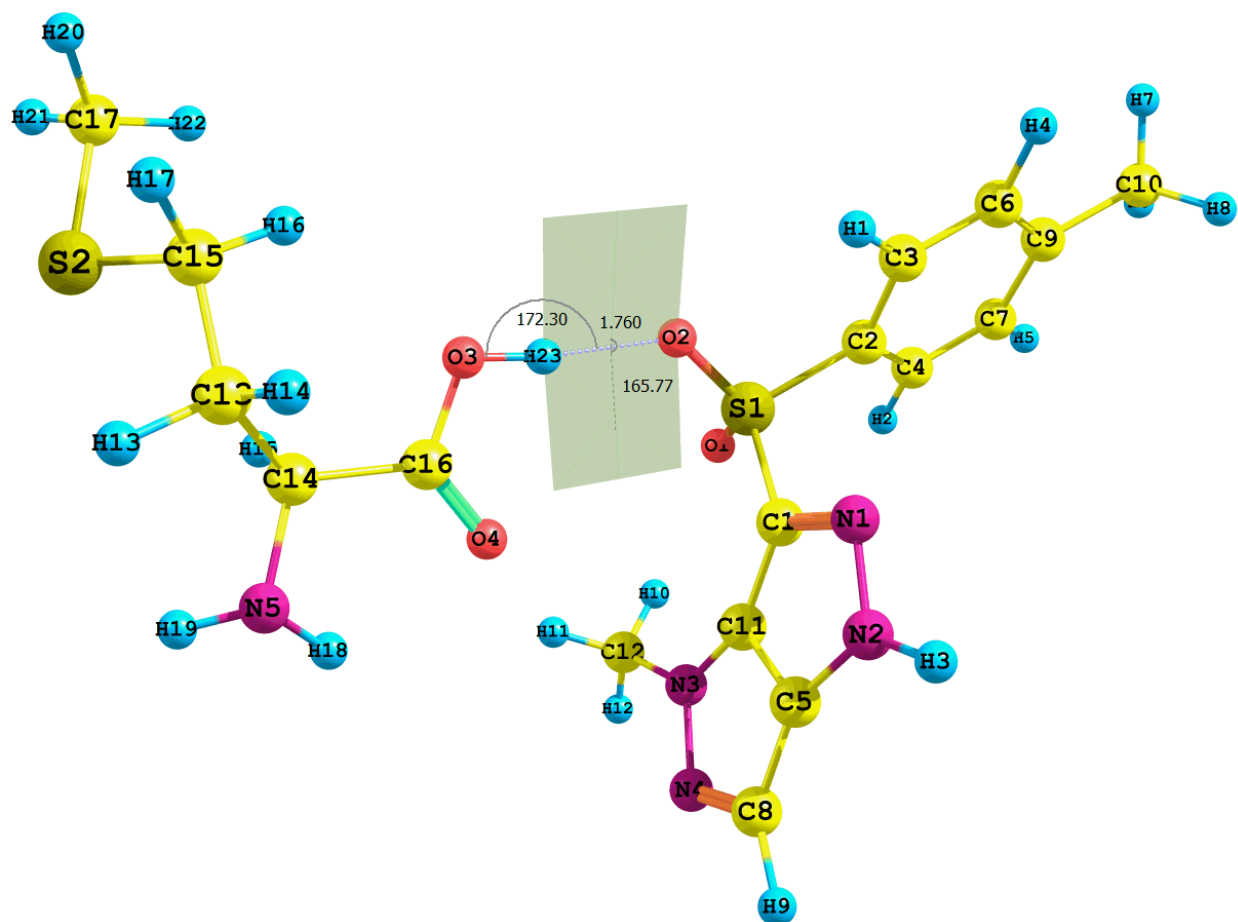

**Figure S19.** Hydrogen bond parameters within the 7-methionine adduct **7MetB6**, interaction energy  $E = -8.63$  (-8.39) kcal/mole,  $J_{\text{H-O}} = 7.43$  Hz.

**Table S1.** Values of electron densities ( $\rho$ ) and Laplacian fields ( $\nabla^2\rho$ ) (in eÅ) of the hydrogen-bonded **7-Ala** adducts.

| Parameter      | Adduct       | Hydrogen bond  |                  |
|----------------|--------------|----------------|------------------|
|                |              | O-H $\cdots$ N | C-H $\cdots$ O=C |
| $\rho$         | <b>7AlaB</b> | 0.032687       | 0.014820         |
| $\nabla^2\rho$ | <b>7AlaB</b> | 0.082415       | 0.042042         |
| $\rho$         | <b>7AlaM</b> | 0.030902       | 0.017124         |
| $\nabla^2\rho$ | <b>7AlaM</b> | 0.079888       | 0.052129         |

**Table S2.** Values of electron densities ( $\rho$ ) and Laplacian fields ( $\nabla^2\rho$ ) (in eÅ) of the hydrogen-bonded **7-Glu** adducts.

| Parameter      | Adduct               | Hydrogen bond    |                |
|----------------|----------------------|------------------|----------------|
|                |                      | N-H $\cdots$ O=C | O-H $\cdots$ N |
| $\rho$         | <b>7GluB (7GluP)</b> | 0.029184         | 0.048345       |
| $\nabla^2\rho$ | <b>7GluB (7GluP)</b> | 0.083141         | 0.106983       |
| $\rho$         | <b>7GluB6</b>        | 0.024299         | 0.015119       |
| $\nabla^2\rho$ | <b>7GluB6</b>        | 0.090097         | 0.049104       |

**Table S3.** Values of electron densities ( $\rho$ ) and Laplacian fields ( $\nabla^2\rho$ ) (in eÅ) of the hydrogen-bonded **7-Met** adducts; nd – no data were calculated.

| Parameter      | Adduct        | Hydrogen bond                |                               |
|----------------|---------------|------------------------------|-------------------------------|
|                |               | N-H $\cdots$ NH <sub>2</sub> | O-H $\cdots$ O <sub>2</sub> S |
| $\rho$         | <b>7MetB</b>  | 0.031705                     | 0.021761                      |
| $\nabla^2\rho$ | <b>7MetB</b>  | 0.067738                     | 0.065721                      |
| $\rho$         | <b>7MetB6</b> | nd                           | 0.035009                      |
| $\nabla^2\rho$ | <b>7MetB6</b> | nd                           | 0.126416                      |

**Table S4.** Experimental ( $\delta_{\text{exp}}$ ) and calculated chemical shifts (rotamers **7AlaB**–**7AlaB<sub>c</sub>**) for compound **7** within the **7–Ala** adduct; absolute errors ( $\delta_{\text{I}} - \delta_{\text{Ic}}$ ), average absolute error ( $\delta$ ), relative percentage errors ( $\Delta\delta$ ); calculated NMR shielding for proton  $H_{\text{ref}} = 31.755$  ppm for TMS (B3LYP/6-31G(d,p)/GIAO); MAD = 1.09.

| Locant    | $\delta_{\text{exp}}$ | <b>7AlaB</b> | <b>7AlaB<sub>a</sub></b> | <b>7AlaB<sub>b</sub></b> | <b>7AlaB<sub>c</sub></b> | $\Delta_{7\text{AlaB}}$ | $\Delta_{7\text{AlaBa}}$ | $\Delta_{7\text{AlaBb}}$ | $\Delta_{7\text{AlaBc}}$ | $\delta$ | $\Delta\delta$ |
|-----------|-----------------------|--------------|--------------------------|--------------------------|--------------------------|-------------------------|--------------------------|--------------------------|--------------------------|----------|----------------|
| <b>A</b>  | 2.37                  | 2.22         | 2.26                     | 2.24                     | 2.24                     | 0.15                    | 0.11                     | 0.14                     | 0.14                     | 0.13     | 6              |
| <b>B</b>  | 7.65                  | 7.06         | 7.19                     | 7.15                     | 7.16                     | 0.59                    | 0.46                     | 0.50                     | 0.49                     | 0.51     | 7              |
| <b>NH</b> | 13.67                 | 8.78         | 8.71                     | 8.71                     | 8.65                     | 4.90                    | 4.96                     | 4.96                     | 5.02                     | 4.96     | 36             |
| <b>C</b>  | 7.85                  | 8.55         | 8.70                     | 8.77                     | 8.75                     | 0.69                    | 0.85                     | 0.91                     | 0.90                     | 0.84     | 11             |
| <b>D</b>  | 7.43                  | 7.37         | 7.43                     | 7.40                     | 7.41                     | 0.06                    | 0.01                     | 0.03                     | 0.03                     | 0.03     | 0              |
| <b>E</b>  | 4.08                  | 4.05         | 4.13                     | 4.21                     | 4.19                     | 0.03                    | 0.06                     | 0.14                     | 0.12                     | 0.08     | 2              |

**Table S5.** Experimental ( $\delta_{\text{exp}}$ ) and calculated chemical shifts (rotamers **7AlaB6**–**7AlaB6<sub>c</sub>**) for compound **7** within the **7–Ala** adduct; absolute errors ( $\delta_{\text{II}} - \delta_{\text{IIc}}$ ), average absolute error ( $\delta$ ), relative percentage errors ( $\Delta\delta$ ); calculated NMR shielding for proton  $H_{\text{ref}} = 31.9844$  ppm for TMS (B3LYP/6-311+G(d,p)/GIAO); MAD = 1.82.

| Locant    | $\delta_{\text{exp}}$ | <b>7AlaB6</b> | <b>7AlaB6<sub>a</sub></b> | <b>7AlaB6<sub>b</sub></b> | <b>7AlaB6<sub>c</sub></b> | $\Delta_{7\text{AlaB6}}$ | $\Delta_{7\text{AlaB6a}}$ | $\Delta_{7\text{AlaB6b}}$ | $\Delta_{7\text{AlaB6c}}$ | $\delta$ | $\Delta\delta$ |
|-----------|-----------------------|---------------|---------------------------|---------------------------|---------------------------|--------------------------|---------------------------|---------------------------|---------------------------|----------|----------------|
| <b>A</b>  | 2.37                  | 2.35          | 2.61                      | 2.36                      | 7.68                      | 0.02                     | 0.24                      | 0.02                      | 5.31                      | 1.40     | 59             |
| <b>B</b>  | 7.65                  | 6.98          | 7.53                      | 7.40                      | 7.24                      | 0.67                     | 0.12                      | 0.25                      | 0.41                      | 0.36     | 5              |
| <b>NH</b> | 13.67                 | 8.87          | 9.02                      | 8.78                      | 6.74                      | 4.80                     | 4.65                      | 4.89                      | 6.93                      | 5.32     | 39             |
| <b>C</b>  | 7.85                  | 8.74          | 9.28                      | 8.94                      | 3.71                      | 0.89                     | 1.43                      | 1.09                      | 4.15                      | 1.89     | 24             |
| <b>D</b>  | 7.43                  | 7.44          | 7.85                      | 7.55                      | 4.51                      | 0.00                     | 0.42                      | 0.12                      | 2.92                      | 0.87     | 12             |
| <b>E</b>  | 4.08                  | 4.02          | 4.53                      | 4.47                      | 7.56                      | 0.06                     | 0.45                      | 0.39                      | 3.49                      | 1.10     | 27             |

**Table S6.** Experimental ( $\delta_{\text{exp}}$ ) and calculated chemical shifts (rotamers **7AlaC**–**7AlaC<sub>c</sub>**) for compound **7** within the **7–Ala** adduct; absolute errors ( $\delta_{\text{III}} - \delta_{\text{IIIc}}$ ), average absolute error ( $\delta$ ), relative percentage errors ( $\Delta\delta$ ); calculated NMR shielding for proton  $H_{\text{ref}} = 31.7749$  ppm for TMS (CAM-B3LYP/6-31G(d,p)/GIAO); MAD = 1.12.

| Locant    | $\delta_{\text{exp}}$ | <b>7AlaC</b> | <b>7AlaC<sub>a</sub></b> | <b>7AlaC<sub>b</sub></b> | <b>7AlaC<sub>c</sub></b> | $\Delta_{7\text{AlaC}}$ | $\Delta_{7\text{AlaCa}}$ | $\Delta_{7\text{AlaCb}}$ | $\Delta_{7\text{AlaCc}}$ | $\delta$ | $\Delta\delta$ |
|-----------|-----------------------|--------------|--------------------------|--------------------------|--------------------------|-------------------------|--------------------------|--------------------------|--------------------------|----------|----------------|
| <b>A</b>  | 2.37                  | 2.26         | 2.27                     | 2.26                     | 2.27                     | 0.11                    | 0.10                     | 0.11                     | 0.10                     | 0.11     | 5              |
| <b>B</b>  | 7.65                  | 7.24         | 7.28                     | 7.25                     | 7.21                     | 0.41                    | 0.37                     | 0.40                     | 0.44                     | 0.40     | 5              |
| <b>NH</b> | 13.67                 | 8.78         | 8.78                     | 8.79                     | 8.79                     | 4.89                    | 4.89                     | 4.89                     | 4.88                     | 4.89     | 36             |
| <b>C</b>  | 7.85                  | 9.00         | 8.98                     | 9.02                     | 9.00                     | 1.15                    | 1.13                     | 1.17                     | 1.15                     | 1.15     | 15             |
| <b>D</b>  | 7.43                  | 7.49         | 7.49                     | 7.48                     | 7.49                     | 0.06                    | 0.06                     | 0.04                     | 0.05                     | 0.05     | 1              |
| <b>E</b>  | 4.08                  | 4.20         | 4.20                     | 4.23                     | 4.20                     | 0.13                    | 0.12                     | 0.15                     | 0.13                     | 0.13     | 3              |

**Table S7.** Experimental ( $\delta_{\text{exp}}$ ) and calculated chemical shifts (rotamers **7AlaP**–**7AlaP<sub>c</sub>**) for compound **7** within the **7–Ala** adduct; absolute errors ( $\delta_{\text{IV}} - \delta_{\text{IVc}}$ ), average absolute error ( $\delta$ ), relative percentage errors ( $\Delta\delta$ ); calculated NMR shielding for proton  $H_{\text{ref}} = 31.6651$  ppm for TMS (PBE1PBE/6-31G(d,p)/GIAO); MAD = 1.13.

| Locant    | $\delta_{\text{exp}}$ | <b>7AlaP</b> | <b>7AlaP<sub>a</sub></b> | <b>7AlaP<sub>b</sub></b> | <b>7AlaP<sub>c</sub></b> | $\Delta_{7\text{AlaP}}$ | $\Delta_{7\text{AlaPa}}$ | $\Delta_{7\text{AlaPb}}$ | $\Delta_{7\text{AlaPc}}$ | $\delta$ | $\Delta\delta$ |
|-----------|-----------------------|--------------|--------------------------|--------------------------|--------------------------|-------------------------|--------------------------|--------------------------|--------------------------|----------|----------------|
| <b>A</b>  | 2.37                  | 2.29         | 2.30                     | 2.28                     | 2.29                     | 0.09                    | 0.07                     | 0.09                     | 0.08                     | 0.09     | 4              |
| <b>B</b>  | 7.65                  | 7.25         | 7.27                     | 7.24                     | 7.21                     | 0.40                    | 0.38                     | 0.41                     | 0.44                     | 0.41     | 5              |
| <b>NH</b> | 13.67                 | 8.72         | 8.72                     | 8.72                     | 8.70                     | 4.95                    | 4.95                     | 4.95                     | 4.97                     | 4.96     | 36             |
| <b>C</b>  | 7.85                  | 8.96         | 8.93                     | 8.99                     | 8.97                     | 1.11                    | 1.08                     | 1.14                     | 1.11                     | 1.11     | 14             |
| <b>D</b>  | 7.43                  | 7.55         | 7.55                     | 7.53                     | 7.53                     | 0.11                    | 0.12                     | 0.09                     | 0.10                     | 0.10     | 1              |
| <b>E</b>  | 4.08                  | 4.18         | 4.19                     | 4.23                     | 4.21                     | 0.10                    | 0.11                     | 0.16                     | 0.13                     | 0.13     | 3              |

**Table S8.** Experimental ( $\delta_{\text{exp}}$ ) and calculated chemical shifts (rotamers **7AlaM**–**7AlaM<sub>c</sub>**) for compound **7** within the **7–Ala** adduct; absolute errors ( $\delta_{\text{V}}-\delta_{\text{Vc}}$ ), average absolute error ( $\delta$ ), relative percentage errors ( $\Delta\delta$ ); calculated NMR shielding for proton  $H_{\text{ref}} = 31.9579$  ppm for TMS (M06L/6-31G(d,p)/GIAO); MAD = 0.97.

| Locant    | $\delta_{\text{exp}}$ | <b>7AlaM</b> | <b>7AlaM<sub>a</sub></b> | <b>7AlaM<sub>b</sub></b> | <b>7AlaM<sub>c</sub></b> | $\Delta_{\text{7AlaM}}$ | $\Delta_{\text{7AlaMa}}$ | $\Delta_{\text{7AlaMb}}$ | $\Delta_{\text{7AlaMc}}$ | $\Delta$ | $\Delta\delta$ |
|-----------|-----------------------|--------------|--------------------------|--------------------------|--------------------------|-------------------------|--------------------------|--------------------------|--------------------------|----------|----------------|
| <b>A</b>  | 2.37                  | 2.29         | 2.30                     | 2.28                     | 2.29                     | 0.09                    | 0.07                     | 0.09                     | 0.08                     | 0.09     | 4              |
| <b>B</b>  | 7.65                  | 7.25         | 7.27                     | 7.24                     | 7.21                     | 0.40                    | 0.38                     | 0.41                     | 0.44                     | 0.41     | 5              |
| <b>NH</b> | 13.67                 | 8.72         | 8.72                     | 8.72                     | 8.70                     | 4.95                    | 4.95                     | 4.95                     | 4.97                     | 4.96     | 36             |
| <b>C</b>  | 7.85                  | 8.96         | 8.93                     | 8.99                     | 8.97                     | 1.11                    | 1.08                     | 1.14                     | 1.11                     | 1.11     | 14             |
| <b>D</b>  | 7.43                  | 7.55         | 7.55                     | 7.53                     | 7.53                     | 0.11                    | 0.12                     | 0.09                     | 0.10                     | 0.10     | 1              |
| <b>E</b>  | 4.08                  | 4.18         | 4.19                     | 4.23                     | 4.21                     | 0.10                    | 0.11                     | 0.16                     | 0.13                     | 0.13     | 3              |

**Table S9.** Experimental ( $\delta_{\text{exp}}$ ) and calculated chemical shifts (rotamers **7LysB**–**7LysB<sub>c</sub>**) for compound **7** within the **7–Lys** adduct; absolute errors ( $\delta_{\text{VI}}-\delta_{\text{VIC}}$ ), average absolute error ( $\delta$ ), relative percentage errors ( $\Delta\delta$ ); calculated NMR shielding for proton  $H_{\text{ref}} = 31.755$  ppm for TMS (B3LYP/6-31G(d,p)/GIAO); MAD = 0.34.

| Locant    | $\delta_{\text{exp}}$ | <b>7LysB</b> | <b>7LysB<sub>a</sub></b> | <b>7LysB<sub>b</sub></b> | <b>7LysB<sub>c</sub></b> | $\Delta_{\text{7LysB}}$ | $\Delta_{\text{7LysBa}}$ | $\Delta_{\text{7LysBb}}$ | $\Delta_{\text{7LysBc}}$ | $\delta$ | $\Delta\delta$ |
|-----------|-----------------------|--------------|--------------------------|--------------------------|--------------------------|-------------------------|--------------------------|--------------------------|--------------------------|----------|----------------|
| <b>A</b>  | 2.37                  | 2.26         | 2.24                     | 2.22                     | 2.27                     | 0.12                    | 0.13                     | 0.15                     | 0.10                     | 0.13     | 5              |
| <b>B</b>  | 7.65                  | 7.23         | 7.24                     | 7.12                     | 7.24                     | 0.42                    | 0.41                     | 0.53                     | 0.41                     | 0.44     | 6              |
| <b>NH</b> | 13.67                 | 12.87        | 12.87                    | 12.59                    | 12.83                    | 0.81                    | 0.81                     | 1.08                     | 0.85                     | 0.89     | 6              |
| <b>C</b>  | 7.85                  | 8.10         | 8.28                     | 8.05                     | 8.11                     | 0.24                    | 0.42                     | 0.20                     | 0.26                     | 0.28     | 4              |
| <b>D</b>  | 7.43                  | 7.36         | 7.34                     | 7.27                     | 7.37                     | 0.08                    | 0.09                     | 0.17                     | 0.06                     | 0.10     | 1              |
| <b>E</b>  | 4.08                  | 4.26         | 4.29                     | 4.24                     | 4.26                     | 0.19                    | 0.21                     | 0.16                     | 0.18                     | 0.19     | 5              |

**Table S10.** Experimental ( $\delta_{\text{exp}}$ ) and calculated chemical shifts (rotamers **7LysB6**–**7LysB6<sub>c</sub>**) for compound **7** within the **7–Lys** adduct; absolute errors ( $\delta_{\text{VII}}-\delta_{\text{VIIc}}$ ), average absolute error ( $\delta$ ), relative percentage errors ( $\Delta\delta$ ); calculated NMR shielding for proton  $H_{\text{ref}} = 31.9844$  ppm for TMS (B3LYP/6-311+G(d,p)/GIAO); MAD = 0.37.

| Locant    | $\delta_{\text{exp}}$ | <b>7LysB6</b> | <b>7LysB6<sub>a</sub></b> | <b>7LysB6<sub>b</sub></b> | <b>7LysB6<sub>c</sub></b> | $\Delta_{\text{7LysB6}}$ | $\Delta_{\text{7LysB6a}}$ | $\Delta_{\text{7LysB6b}}$ | $\Delta_{\text{7LysB6c}}$ | $\delta$ | $\Delta\delta$ |
|-----------|-----------------------|---------------|---------------------------|---------------------------|---------------------------|--------------------------|---------------------------|---------------------------|---------------------------|----------|----------------|
| <b>A</b>  | 2.37                  | 2.31          | 2.47                      | 2.49                      | 2.55                      | 0.06                     | 0.09                      | 0.12                      | 0.18                      | 0.11     | 5              |
| <b>B</b>  | 7.65                  | 7.23          | 7.36                      | 7.40                      | 7.46                      | 0.42                     | 0.29                      | 0.25                      | 0.19                      | 0.29     | 4              |
| <b>NH</b> | 13.67                 | 12.77         | 12.47                     | 12.73                     | 12.65                     | 0.91                     | 1.21                      | 0.94                      | 1.03                      | 1.02     | 7              |
| <b>C</b>  | 7.85                  | 8.31          | 8.02                      | 8.28                      | 8.14                      | 0.45                     | 0.16                      | 0.43                      | 0.29                      | 0.33     | 4              |
| <b>D</b>  | 7.43                  | 7.39          | 7.52                      | 7.51                      | 7.47                      | 0.04                     | 0.09                      | 0.07                      | 0.04                      | 0.06     | 1              |
| <b>E</b>  | 4.08                  | 4.42          | 4.55                      | 4.48                      | 4.48                      | 0.34                     | 0.48                      | 0.41                      | 0.40                      | 0.41     | 10             |

**Table S11.** Experimental ( $\delta_{\text{exp}}$ ) and calculated chemical shifts (rotamers **7LysC**–**7LysC<sub>c</sub>**) for compound **7** within the **7–Lys** adduct; absolute errors ( $\delta_{\text{VIII}}-\delta_{\text{VIIIc}}$ ), average absolute error ( $\delta$ ), relative percentage errors ( $\Delta\delta$ ); calculated NMR shielding for proton  $H_{\text{ref}} = 31.7749$  ppm for TMS (CAM-B3LYP/6-31G(d,p)/GIAO); MAD = 0.29.

| Locant    | $\delta_{\text{exp}}$ | <b>7LysC</b> | <b>7LysC<sub>a</sub></b> | <b>7LysC<sub>b</sub></b> | <b>7LysC<sub>c</sub></b> | $\Delta_{\text{7LysC}}$ | $\Delta_{\text{7LysCa}}$ | $\Delta_{\text{7LysCb}}$ | $\Delta_{\text{7LysCc}}$ | $\delta$ | $\Delta\delta$ |
|-----------|-----------------------|--------------|--------------------------|--------------------------|--------------------------|-------------------------|--------------------------|--------------------------|--------------------------|----------|----------------|
| <b>A</b>  | 2.37                  | 2.28         | 2.27                     | 2.28                     | 2.29                     | 0.09                    | 0.10                     | 0.09                     | 0.08                     | 0.09     | 4              |
| <b>B</b>  | 7.65                  | 7.31         | 7.31                     | 7.31                     | 7.31                     | 0.34                    | 0.34                     | 0.34                     | 0.34                     | 0.34     | 4              |
| <b>NH</b> | 13.67                 | 13.03        | 13.03                    | 13.04                    | 13.00                    | 0.64                    | 0.64                     | 0.63                     | 0.67                     | 0.65     | 5              |
| <b>C</b>  | 7.85                  | 8.28         | 8.27                     | 8.28                     | 8.29                     | 0.43                    | 0.42                     | 0.42                     | 0.43                     | 0.43     | 5              |
| <b>D</b>  | 7.43                  | 7.45         | 7.45                     | 7.46                     | 7.46                     | 0.02                    | 0.01                     | 0.03                     | 0.03                     | 0.02     | 0              |
| <b>E</b>  | 4.08                  | 4.31         | 4.32                     | 4.30                     | 4.31                     | 0.23                    | 0.24                     | 0.23                     | 0.23                     | 0.23     | 6              |

**Table S12.** Experimental ( $\delta_{\text{exp}}$ ) and calculated chemical shifts (rotamers **7LysM**–**7LysM<sub>c</sub>**) for compound **7** within the **7–Lys** adduct; absolute errors ( $\delta_{\text{X}} - \delta_{\text{Xc}}$ ), average absolute error ( $\delta$ ), relative percentage errors ( $\Delta\delta$ ); calculated NMR shielding for proton  $H_{\text{ref}} = 31.9579$  ppm for TMS (M06L/6-31G(d,p)/GIAO); MAD = 0.41.

| Locant    | $\delta_{\text{exp}}$ | <b>7LysM</b> | <b>7LysM<sub>a</sub></b> | <b>7LysM<sub>b</sub></b> | <b>7LysM<sub>c</sub></b> | $\Delta_{\text{7LysM}}$ | $\Delta_{\text{7LysMa}}$ | $\Delta_{\text{7LysMb}}$ | $\Delta_{\text{7LysMc}}$ | $\delta$ | $\Delta\delta$ |
|-----------|-----------------------|--------------|--------------------------|--------------------------|--------------------------|-------------------------|--------------------------|--------------------------|--------------------------|----------|----------------|
| <b>A</b>  | 2.37                  | 2.13         | 2.26                     | 2.25                     | 2.21                     | 0.25                    | 0.12                     | 0.13                     | 0.17                     | 0.17     | 7              |
| <b>B</b>  | 7.65                  | 7.74         | 6.99                     | 7.73                     | 7.65                     | 0.09                    | 0.66                     | 0.08                     | 0.01                     | 0.21     | 3              |
| <b>NH</b> | 13.67                 | 12.14        | 12.49                    | 12.59                    | 12.37                    | 1.53                    | 1.18                     | 1.08                     | 1.31                     | 1.27     | 9              |
| <b>C</b>  | 7.85                  | 7.97         | 8.16                     | 8.27                     | 8.30                     | 0.11                    | 0.31                     | 0.42                     | 0.45                     | 0.32     | 4              |
| <b>D</b>  | 7.43                  | 7.14         | 7.16                     | 7.07                     | 7.05                     | 0.29                    | 0.27                     | 0.36                     | 0.39                     | 0.33     | 4              |
| <b>E</b>  | 4.08                  | 4.52         | 4.22                     | 4.15                     | 4.16                     | 0.44                    | 0.14                     | 0.07                     | 0.09                     | 0.19     | 5              |

**Table S13.** Experimental ( $\delta_{\text{exp}}$ ) and calculated chemical shifts (rotamers **7GluB**–**7GluB<sub>c</sub>**) for compound **7** within the **7–Glu** adduct; absolute errors ( $\delta_{\text{XI}} - \delta_{\text{XIc}}$ ), average absolute error ( $\delta$ ), relative percentage errors ( $\Delta\delta$ ); calculated NMR shielding for proton  $H_{\text{ref}} = 31.755$  ppm for TMS (B3LYP/6-31G(d,p)/GIAO); MAD = 0.39.

| Locant    | $\delta_{\text{exp}}$ | <b>7GluB</b> | <b>7GluB<sub>a</sub></b> | <b>7GluB<sub>b</sub></b> | <b>7GluB<sub>c</sub></b> | $\Delta_{\text{7GluB}}$ | $\Delta_{\text{7GluBa}}$ | $\Delta_{\text{7GluBb}}$ | $\Delta_{\text{7GluBc}}$ | $\delta$ | $\Delta\delta$ |
|-----------|-----------------------|--------------|--------------------------|--------------------------|--------------------------|-------------------------|--------------------------|--------------------------|--------------------------|----------|----------------|
| <b>A</b>  | 2.37                  | 2.29         | 2.29                     | 2.32                     | 2.28                     | 0.09                    | 0.08                     | 0.06                     | 0.09                     | 0.08     | 3              |
| <b>B</b>  | 7.65                  | 7.37         | 7.27                     | 7.27                     | 7.30                     | 0.28                    | 0.38                     | 0.38                     | 0.35                     | 0.35     | 5              |
| <b>NH</b> | 13.67                 | 12.25        | 12.28                    | 12.29                    | 12.29                    | 1.42                    | 1.39                     | 1.39                     | 1.38                     | 1.40     | 10             |
| <b>C</b>  | 7.85                  | 8.05         | 8.07                     | 8.09                     | 8.08                     | 0.20                    | 0.22                     | 0.24                     | 0.22                     | 0.22     | 3              |
| <b>D</b>  | 7.43                  | 7.51         | 7.49                     | 7.53                     | 7.50                     | 0.07                    | 0.05                     | 0.10                     | 0.07                     | 0.07     | 1              |
| <b>E</b>  | 4.08                  | 4.32         | 4.32                     | 4.32                     | 4.30                     | 0.24                    | 0.25                     | 0.24                     | 0.23                     | 0.24     | 6              |

**Table S14.** Experimental ( $\delta_{\text{exp}}$ ) and calculated chemical shifts (rotamers **7GluB6**–**7GluB6<sub>c</sub>**) for compound **7** within the **7–Glu** adduct; absolute errors ( $\delta_{\text{XII}} - \delta_{\text{XIIc}}$ ), average absolute error ( $\delta$ ), relative percentage errors ( $\Delta\delta$ ); calculated NMR shielding for proton  $H_{\text{ref}} = 31.9844$  ppm for TMS (B3LYP/6-311+G(d,p)/GIAO); MAD = 0.51.

| Locant    | $\delta_{\text{exp}}$ | <b>7GluB6</b> | <b>7GluB6<sub>a</sub></b> | <b>7GluB6<sub>b</sub></b> | <b>7GluB6<sub>c</sub></b> | $\Delta_{\text{7GluB6}}$ | $\Delta_{\text{7GluB6a}}$ | $\Delta_{\text{7GluB6b}}$ | $\Delta_{\text{7GluB6c}}$ | $\delta$ | $\Delta\delta$ |
|-----------|-----------------------|---------------|---------------------------|---------------------------|---------------------------|--------------------------|---------------------------|---------------------------|---------------------------|----------|----------------|
| <b>A</b>  | 2.37                  | 2.31          | 2.50                      | 2.42                      | 2.44                      | 0.06                     | 0.13                      | 0.04                      | 0.07                      | 0.08     | 3              |
| <b>B</b>  | 7.65                  | 7.38          | 7.34                      | 7.49                      | 7.39                      | 0.27                     | 0.31                      | 0.16                      | 0.27                      | 0.25     | 3              |
| <b>NH</b> | 13.67                 | 12.08         | 12.28                     | 11.10                     | 11.64                     | 1.59                     | 1.39                      | 2.58                      | 2.04                      | 1.90     | 14             |
| <b>C</b>  | 7.85                  | 8.40          | 8.11                      | 8.03                      | 8.13                      | 0.55                     | 0.25                      | 0.18                      | 0.27                      | 0.31     | 4              |
| <b>D</b>  | 7.43                  | 7.63          | 7.49                      | 7.62                      | 7.31                      | 0.20                     | 0.05                      | 0.18                      | 0.13                      | 0.14     | 2              |
| <b>E</b>  | 4.08                  | 4.36          | 4.44                      | 4.58                      | 4.49                      | 0.29                     | 0.37                      | 0.51                      | 0.41                      | 0.39     | 10             |

**Table S15.** Experimental ( $\delta_{\text{exp}}$ ) and calculated chemical shifts (rotamers **7GluC**–**7GluC<sub>c</sub>**) for compound **7** within the **7–Glu** adduct; absolute errors ( $\delta_{\text{XIII}} - \delta_{\text{XIIIC}}$ ), average absolute error ( $\delta$ ), relative percentage errors ( $\Delta\delta$ ); calculated NMR shielding for proton  $H_{\text{ref}} = 31.7749$  ppm for TMS (CAM-B3LYP/6-31G(d,p)/GIAO); MAD = 0.40.

| Locant    | $\delta_{\text{exp}}$ | <b>7GluC</b> | <b>7GluC<sub>a</sub></b> | <b>7GluC<sub>b</sub></b> | <b>7GluC<sub>c</sub></b> | $\Delta_{\text{7GluC}}$ | $\Delta_{\text{7GluCa}}$ | $\Delta_{\text{7GluCb}}$ | $\Delta_{\text{7GluCc}}$ | $\Delta$ | $\Delta\delta$ |
|-----------|-----------------------|--------------|--------------------------|--------------------------|--------------------------|-------------------------|--------------------------|--------------------------|--------------------------|----------|----------------|
| <b>A</b>  | 2.37                  | 2.32         | 2.37                     | 2.35                     | 2.32                     | 0.05                    | 0.01                     | 0.03                     | 0.05                     | 0.03     | 1              |
| <b>B</b>  | 7.65                  | 7.41         | 7.45                     | 7.35                     | 7.36                     | 0.24                    | 0.20                     | 0.30                     | 0.29                     | 0.26     | 3              |
| <b>NH</b> | 13.67                 | 12.46        | 12.45                    | 12.48                    | 12.49                    | 1.21                    | 1.22                     | 1.19                     | 1.18                     | 1.20     | 9              |
| <b>C</b>  | 7.85                  | 8.24         | 8.29                     | 8.26                     | 8.25                     | 0.39                    | 0.44                     | 0.41                     | 0.40                     | 0.41     | 5              |
| <b>D</b>  | 7.43                  | 7.62         | 7.66                     | 7.64                     | 7.62                     | 0.19                    | 0.22                     | 0.20                     | 0.19                     | 0.20     | 3              |
| <b>E</b>  | 4.08                  | 4.38         | 4.40                     | 4.38                     | 4.37                     | 0.30                    | 0.32                     | 0.31                     | 0.29                     | 0.31     | 7              |

**Table S16.** Experimental ( $\delta_{\text{exp}}$ ) and calculated chemical shifts (rotamers **7GluP**–**7GluP<sub>c</sub>**) for compound **7** within the **7–Glu** adduct; absolute errors ( $\delta_{\text{XIV}}-\delta_{\text{XIVc}}$ ), average absolute error ( $\delta$ ), relative percentage errors ( $\Delta\delta$ ); calculated NMR shielding for proton  $H_{\text{ref}} = 31.6651$  ppm for TMS (PBE1PBE/6-31G(d,p)/GIAO); MAD = 0.39.

| Locant    | $\delta_{\text{exp}}$ | <b>7GluP</b> | <b>7GluP<sub>a</sub></b> | <b>7GluP<sub>b</sub></b> | <b>7GluP<sub>c</sub></b> | $\Delta_{\text{7GluP}}$ | $\Delta_{\text{7GluPa}}$ | $\Delta_{\text{7GluPb}}$ | $\Delta_{\text{7GluPc}}$ | $\delta$ | $\Delta\delta$ |
|-----------|-----------------------|--------------|--------------------------|--------------------------|--------------------------|-------------------------|--------------------------|--------------------------|--------------------------|----------|----------------|
| <b>A</b>  | 2.37                  | 2.34         | 2.34                     | 2.36                     | 2.33                     | 0.03                    | 0.03                     | 0.01                     | 0.04                     | 0.03     | 1              |
| <b>B</b>  | 7.65                  | 7.41         | 7.35                     | 7.35                     | 7.36                     | 0.24                    | 0.30                     | 0.30                     | 0.29                     | 0.28     | 4              |
| <b>NH</b> | 13.67                 | 12.57        | 12.56                    | 12.57                    | 12.56                    | 1.10                    | 1.12                     | 1.10                     | 1.11                     | 1.11     | 8              |
| <b>C</b>  | 7.85                  | 8.23         | 8.25                     | 8.26                     | 8.26                     | 0.38                    | 0.39                     | 0.40                     | 0.40                     | 0.39     | 5              |
| <b>D</b>  | 7.43                  | 7.62         | 7.62                     | 7.65                     | 7.64                     | 0.19                    | 0.18                     | 0.22                     | 0.21                     | 0.20     | 3              |
| <b>E</b>  | 4.08                  | 4.38         | 4.40                     | 4.38                     | 4.36                     | 0.30                    | 0.32                     | 0.30                     | 0.29                     | 0.30     | 7              |

**Table S17.** Experimental ( $\delta_{\text{exp}}$ ) and calculated chemical shifts (rotamers **7GluM**–**7GluM<sub>c</sub>**) for compound **7** within the **7–Glu** adduct; absolute errors ( $\delta_{\text{XV}}-\delta_{\text{XVc}}$ ), average absolute error ( $\delta$ ), relative percentage errors ( $\Delta\delta$ ); calculated NMR shielding for proton  $H_{\text{ref}} = 31.9579$  ppm for TMS (M06L/6-31G(d,p)/GIAO); MAD = 0.46.

| Locant    | $\delta_{\text{exp}}$ | <b>7GluM</b> | <b>7GluM<sub>a</sub></b> | <b>7GluM<sub>b</sub></b> | <b>7GluM<sub>c</sub></b> | $\Delta_{\text{7GluM}}$ | $\Delta_{\text{7GluMa}}$ | $\Delta_{\text{7GluMb}}$ | $\Delta_{\text{7GluMc}}$ | $\delta$ | $\Delta\delta$ |
|-----------|-----------------------|--------------|--------------------------|--------------------------|--------------------------|-------------------------|--------------------------|--------------------------|--------------------------|----------|----------------|
| <b>A</b>  | 2.37                  | 2.30         | 2.07                     | 2.31                     | 2.22                     | 0.08                    | 0.30                     | 0.06                     | 0.16                     | 0.15     | 6              |
| <b>B</b>  | 7.65                  | 7.52         | 7.49                     | 7.28                     | 7.90                     | 0.13                    | 0.16                     | 0.37                     | 0.25                     | 0.23     | 3              |
| <b>NH</b> | 13.67                 | 12.08        | 12.22                    | 11.46                    | 11.62                    | 1.59                    | 1.45                     | 2.21                     | 2.06                     | 1.83     | 13             |
| <b>C</b>  | 7.85                  | 7.93         | 8.04                     | 8.02                     | 7.93                     | 0.07                    | 0.19                     | 0.16                     | 0.07                     | 0.12     | 2              |
| <b>D</b>  | 7.43                  | 7.42         | 7.18                     | 7.19                     | 7.26                     | 0.01                    | 0.26                     | 0.25                     | 0.17                     | 0.17     | 2              |
| <b>E</b>  | 4.08                  | 4.33         | 4.13                     | 4.42                     | 4.35                     | 0.26                    | 0.06                     | 0.34                     | 0.27                     | 0.23     | 6              |

**Table S18.** Experimental ( $\delta_{\text{exp}}$ ) and calculated chemical shifts (rotamers **7MetB**–**7MetB<sub>c</sub>**) for compound **7** within the **7–Met** adduct; absolute errors ( $\delta_{\text{XVI}}-\delta_{\text{XVIc}}$ ), average absolute error ( $\delta$ ), relative percentage errors ( $\Delta\delta$ ); calculated NMR shielding for proton  $H_{\text{ref}} = 31.755$  ppm for TMS (B3LYP/6-31G(d,p)/GIAO); MAD = 0.26.

| Locant    | $\delta_{\text{exp}}$ | <b>7MetB</b> | <b>7MetB<sub>a</sub></b> | <b>7MetB<sub>b</sub></b> | <b>7MetB<sub>c</sub></b> | $\Delta_{\text{7MetB}}$ | $\Delta_{\text{7MetBa}}$ | $\Delta_{\text{7MetBb}}$ | $\Delta_{\text{7MetBc}}$ | $\delta$ | $\Delta\delta$ |
|-----------|-----------------------|--------------|--------------------------|--------------------------|--------------------------|-------------------------|--------------------------|--------------------------|--------------------------|----------|----------------|
| <b>A</b>  | 2.37                  | 2.28         | 2.28                     | 2.27                     | 2.24                     | 0.10                    | 0.10                     | 0.11                     | 0.13                     | 0.11     | 5              |
| <b>B</b>  | 7.65                  | 7.17         | 7.14                     | 7.18                     | 7.30                     | 0.48                    | 0.51                     | 0.47                     | 0.35                     | 0.45     | 6              |
| <b>NH</b> | 13.67                 | 13.29        | 13.26                    | 13.33                    | 12.85                    | 0.38                    | 0.41                     | 0.34                     | 0.82                     | 0.49     | 4              |
| <b>C</b>  | 7.85                  | 8.19         | 8.18                     | 8.21                     | 8.05                     | 0.34                    | 0.32                     | 0.35                     | 0.20                     | 0.30     | 4              |
| <b>D</b>  | 7.43                  | 7.35         | 7.37                     | 7.33                     | 7.33                     | 0.09                    | 0.07                     | 0.10                     | 0.11                     | 0.09     | 1              |
| <b>E</b>  | 4.08                  | 4.20         | 4.17                     | 4.18                     | 4.23                     | 0.12                    | 0.10                     | 0.11                     | 0.16                     | 0.12     | 3              |

**Table S19.** Experimental ( $\delta_{\text{exp}}$ ) and calculated chemical shifts (rotamers **7MetB6**–**7MetB6<sub>c</sub>**) for compound **7** within the **7–Met** adduct; absolute errors ( $\delta_{\text{XVII}}-\delta_{\text{XVIIc}}$ ), average absolute error ( $\delta$ ), relative percentage errors ( $\Delta\delta$ ); calculated NMR shielding for proton  $H_{\text{ref}} = 31.9844$  ppm for TMS (B3LYP/6-311+G(d,p)/GIAO); MAD = 0.53.

| Locant    | $\delta_{\text{exp}}$ | <b>7MetB6</b> | <b>7MetB6<sub>a</sub></b> | <b>7MetB6<sub>b</sub></b> | <b>7MetB6<sub>c</sub></b> | $\Delta_{\text{7MetB6}}$ | $\Delta_{\text{7MetB6a}}$ | $\Delta_{\text{7MetB6b}}$ | $\Delta_{\text{7MetB6c}}$ | $\delta$ | $\Delta\delta$ |
|-----------|-----------------------|---------------|---------------------------|---------------------------|---------------------------|--------------------------|---------------------------|---------------------------|---------------------------|----------|----------------|
| <b>A</b>  | 2.37                  | 2.57          | 2.45                      | 2.42                      | 2.41                      | 0.20                     | 0.08                      | 0.05                      | 0.04                      | 0.09     | 4              |
| <b>B</b>  | 7.65                  | 7.48          | 7.31                      | 7.40                      | 7.40                      | 0.18                     | 0.34                      | 0.25                      | 0.25                      | 0.25     | 3              |
| <b>NH</b> | 13.67                 | 8.23          | 12.58                     | 12.88                     | 12.53                     | 5.44                     | 1.10                      | 0.79                      | 1.14                      | 2.12     | 15             |
| <b>C</b>  | 7.85                  | 8.14          | 8.19                      | 8.38                      | 8.21                      | 0.29                     | 0.34                      | 0.53                      | 0.36                      | 0.38     | 5              |
| <b>D</b>  | 7.43                  | 7.48          | 7.57                      | 7.51                      | 7.45                      | 0.04                     | 0.13                      | 0.08                      | 0.02                      | 0.07     | 1              |
| <b>E</b>  | 4.08                  | 4.61          | 4.32                      | 4.19                      | 4.26                      | 0.54                     | 0.24                      | 0.11                      | 0.18                      | 0.27     | 7              |

**Table S20.** Experimental ( $\delta_{\text{exp}}$ ) and calculated chemical shifts (rotamers **7MetC**–**7MetC<sub>c</sub>**) for compound **7** within the **7–Met** adduct; absolute errors ( $\delta_{\text{XVIII}} - \delta_{\text{XVIIIc}}$ ), average absolute error ( $\delta$ ), relative percentage errors ( $\Delta\delta$ ); calculated NMR shielding for proton  $H_{\text{ref}} = 31.7749$  ppm for TMS (CAM-B3LYP/6-31G(d,p)/GIAO); MAD = 0.23.

| Locant    | $\delta_{\text{exp}}$ | <b>7MetC</b> | <b>7MetC<sub>a</sub></b> | <b>7MetC<sub>b</sub></b> | <b>7MetC<sub>c</sub></b> | $\Delta_{\text{7MetC}}$ | $\Delta_{\text{7MetCa}}$ | $\Delta_{\text{7MetCb}}$ | $\Delta_{\text{7MetCc}}$ | $\delta$ | $\Delta\delta$ |
|-----------|-----------------------|--------------|--------------------------|--------------------------|--------------------------|-------------------------|--------------------------|--------------------------|--------------------------|----------|----------------|
| <b>A</b>  | 2.37                  | 2.30         | 2.30                     | 2.29                     | 2.29                     | 0.07                    | 0.07                     | 0.08                     | 0.08                     | 0.08     | 3              |
| <b>B</b>  | 7.65                  | 7.24         | 7.22                     | 7.25                     | 7.20                     | 0.41                    | 0.43                     | 0.41                     | 0.45                     | 0.42     | 6              |
| <b>NH</b> | 13.67                 | 13.53        | 13.51                    | 13.55                    | 13.48                    | 0.14                    | 0.16                     | 0.12                     | 0.19                     | 0.15     | 1              |
| <b>C</b>  | 7.85                  | 8.43         | 8.43                     | 8.44                     | 8.43                     | 0.58                    | 0.57                     | 0.59                     | 0.58                     | 0.58     | 7              |
| <b>D</b>  | 7.43                  | 7.45         | 7.46                     | 7.43                     | 7.44                     | 0.01                    | 0.02                     | 0.00                     | 0.00                     | 0.01     | 0              |
| <b>E</b>  | 4.08                  | 4.24         | 4.23                     | 4.24                     | 4.23                     | 0.16                    | 0.15                     | 0.16                     | 0.16                     | 0.16     | 4              |

**Table S21.** Experimental ( $\delta_{\text{exp}}$ ) and calculated chemical shifts (rotamers **7MetP**–**7MetP<sub>c</sub>**) for compound **7** within the **7–Met** adduct; absolute errors ( $\delta_{\text{XIX}} - \delta_{\text{XIXc}}$ ), average absolute error ( $\delta$ ), relative percentage errors ( $\Delta\delta$ ); calculated NMR shielding for proton  $H_{\text{ref}} = 31.6651$  ppm for TMS (PBE1PBE/6-31G(d,p)/GIAO); MAD = 0.24.

| Locant    | $\delta_{\text{exp}}$ | <b>7MetP</b> | <b>7MetP<sub>a</sub></b> | <b>7MetP<sub>b</sub></b> | <b>7MetP<sub>c</sub></b> | $\Delta_{\text{7MetP}}$ | $\Delta_{\text{7MetPa}}$ | $\Delta_{\text{7MetPb}}$ | $\Delta_{\text{7MetPc}}$ | $\delta$ | $\Delta\delta$ |
|-----------|-----------------------|--------------|--------------------------|--------------------------|--------------------------|-------------------------|--------------------------|--------------------------|--------------------------|----------|----------------|
| <b>A</b>  | 2.37                  | 2.29         | 2.32                     | 2.31                     | 2.31                     | 0.08                    | 0.05                     | 0.06                     | 0.07                     | 0.07     | 3              |
| <b>B</b>  | 7.65                  | 7.23         | 7.20                     | 7.23                     | 7.19                     | 0.42                    | 0.45                     | 0.42                     | 0.46                     | 0.44     | 6              |
| <b>NH</b> | 13.67                 | 13.46        | 13.86                    | 13.94                    | 13.88                    | 0.22                    | 0.19                     | 0.27                     | 0.21                     | 0.22     | 2              |
| <b>C</b>  | 7.85                  | 8.38         | 8.39                     | 8.42                     | 8.39                     | 0.52                    | 0.54                     | 0.56                     | 0.53                     | 0.54     | 7              |
| <b>D</b>  | 7.43                  | 7.46         | 7.50                     | 7.47                     | 7.47                     | 0.03                    | 0.06                     | 0.03                     | 0.04                     | 0.04     | 1              |
| <b>E</b>  | 4.08                  | 4.23         | 4.22                     | 4.24                     | 4.23                     | 0.15                    | 0.14                     | 0.16                     | 0.15                     | 0.15     | 4              |

**Table S22.** Experimental ( $\delta_{\text{exp}}$ ) and calculated chemical shifts (rotamers **7MetM**–**7MetM<sub>c</sub>**) for compound **7** within the 7–Met adduct; absolute errors ( $\delta_{\text{XX}} - \delta_{\text{XXc}}$ ), average absolute error ( $\delta$ ), relative percentage errors ( $\Delta\delta$ ); calculated NMR shielding for proton  $H_{\text{ref}} = 31.9579$  ppm for TMS (M06L/6-31G(d,p)/GIAO); MAD = 0.49.

| Locant    | $\delta_{\text{exp}}$ | <b>7MetM</b> | <b>7MetM<sub>a</sub></b> | <b>7MetM<sub>b</sub></b> | <b>7MetM<sub>c</sub></b> | $\Delta_{\text{7MetM}}$ | $\Delta_{\text{7MetMa}}$ | $\Delta_{\text{7MetMb}}$ | $\Delta_{\text{7MetMc}}$ | $\delta$ | $\Delta\delta$ |
|-----------|-----------------------|--------------|--------------------------|--------------------------|--------------------------|-------------------------|--------------------------|--------------------------|--------------------------|----------|----------------|
| <b>A</b>  | 2.37                  | 2.35         | 2.25                     | 2.30                     | 2.31                     | 0.03                    | 0.12                     | 0.07                     | 0.06                     | 0.07     | 3              |
| <b>B</b>  | 7.65                  | 7.51         | 6.93                     | 7.36                     | 6.98                     | 0.14                    | 0.72                     | 0.29                     | 0.67                     | 0.45     | 6              |
| <b>NH</b> | 13.67                 | 9.03         | 13.05                    | 13.09                    | 13.12                    | 4.65                    | 0.63                     | 0.58                     | 0.55                     | 1.60     | 12             |
| <b>C</b>  | 7.85                  | 8.43         | 8.30                     | 8.23                     | 8.30                     | 0.58                    | 0.45                     | 0.38                     | 0.45                     | 0.46     | 6              |
| <b>D</b>  | 7.43                  | 7.37         | 7.44                     | 7.36                     | 7.26                     | 0.07                    | 0.00                     | 0.08                     | 0.17                     | 0.08     | 1              |
| <b>E</b>  | 4.08                  | 3.81         | 4.43                     | 4.38                     | 4.25                     | 0.27                    | 0.35                     | 0.31                     | 0.17                     | 0.27     | 7              |

**Table S23.** Hydrogen bonding within the 7-aminoacid adducts; hydrogen bond (HB) length ( $d$ ), torsion angle (HB donor,  $\alpha$ ), dihedral angle (HB donor–acceptor,  $\tau$ ) and coupling constant (HB donor–acceptor,  $J$ ) are given in Angström [ $\text{\AA}$ ], degrees [ $^\circ$ ], and Herz, respectively.

| Adduct | Hydrogen bond                 | $d$   | HB angle |        | $J$   |
|--------|-------------------------------|-------|----------|--------|-------|
|        |                               |       | $\theta$ | $\tau$ |       |
| 7-Ala  |                               |       |          |        |       |
| 7AlaB  | O-H $\cdots$ N                | 1.892 | 160.1    | -11.0  | -2.05 |
| 7AlaM  | O-H $\cdots$ N                | 1.906 | 173.0    | -54.7  | -2.16 |
| 7AlaB  | C-H $\cdots$ O=C              | 2.236 | 167.0    | -177.8 | 1.39  |
| 7AlaM  | C-H $\cdots$ O=C              | 2.146 | 173.2    | 101.6  | 2.24  |
| 7-Lys  |                               |       |          |        |       |
| 7LysB  | N-H $\cdots$ O=C              | 1.851 | 147.7    | -78.7  | 5.16  |
| 7LysP  | N-H $\cdots$ O=C              | 1.816 | 147.6    | 0.6    | 5.78  |
| 7-Glu  |                               |       |          |        |       |
| 7GluB  | N-H $\cdots$ O=C              | 1.906 | 144.5    | 10.5   | 4.56  |
| 7GluB6 | N-H $\cdots$ O=C              | 1.961 | 148.5    | -17.8  | 4.17  |
| 7GluB  | O-H $\cdots$ N                | 1.729 | 169.7    | 38.0   | -1.18 |
| 7GluB6 | O-H $\cdots$ N                | 2.225 | 160.9    | 65.3   | -9.38 |
| 7-Met  |                               |       |          |        |       |
| 7MetB  | O-H $\cdots$ O <sub>2</sub> S | 1.990 | 144.6    | 33.7   | 4.03  |
| 7MetB6 | O-H $\cdots$ O <sub>2</sub> S | 1.760 | 172.3    | 165.8  | 7.43  |

**Cartesian coordinates** (charge=0, multiplicity=1):

**Adduct 7AlaB:**

|   |              |               |              |
|---|--------------|---------------|--------------|
| O | -4.639366000 | -11.233900000 | 3.797372000  |
| S | -3.367655000 | -10.706917000 | 3.268262000  |
| C | -2.169313000 | -10.975154000 | 4.568997000  |
| O | -3.230435000 | -9.310651000  | 2.840880000  |
| C | -2.839677000 | -11.781354000 | 1.933462000  |
| N | -1.061477000 | -10.234058000 | 4.600122000  |
| C | -1.708729000 | -11.443503000 | 1.183921000  |
| C | -3.584875000 | -12.926761000 | 1.654644000  |
| C | -0.963637000 | -11.660687000 | 6.328197000  |
| N | -0.335634000 | -10.647629000 | 5.659281000  |
| C | -1.328258000 | -12.284953000 | 0.142652000  |
| H | -1.131668000 | -10.548961000 | 1.402033000  |
| C | -3.187071000 | -13.750019000 | 0.602359000  |
| H | -4.464693000 | -13.153437000 | 2.246291000  |
| C | -0.949685000 | -12.562504000 | 7.417513000  |
| H | 0.535703000  | -10.181941000 | 5.858652000  |
| C | -2.057289000 | -13.443985000 | -0.167568000 |
| H | -0.447937000 | -12.032023000 | -0.442003000 |
| H | -3.764768000 | -14.642016000 | 0.375842000  |
| C | -1.642727000 | -14.323754000 | -1.321630000 |
| H | -2.101697000 | -15.313914000 | -1.257953000 |
| H | -1.944893000 | -13.880541000 | -2.278268000 |
| H | -0.556360000 | -14.451675000 | -1.355129000 |
| N | -2.803958000 | -12.893247000 | 6.324395000  |
| C | -2.160091000 | -11.901783000 | 5.643927000  |
| N | -2.063073000 | -13.294477000 | 7.388061000  |
| C | -4.054501000 | -13.568428000 | 6.016278000  |
| H | -0.221594000 | -12.711450000 | 8.200730000  |
| H | -3.875912000 | -14.457852000 | 5.402920000  |
| H | -4.701984000 | -12.877020000 | 5.476876000  |
| H | -4.515467000 | -13.868862000 | 6.957290000  |
| O | -0.086615000 | -7.830152000  | 3.436883000  |
| O | 0.358998000  | -8.884253000  | 1.487841000  |
| N | 2.111502000  | -6.895849000  | 0.791185000  |
| C | 1.071816000  | -6.592701000  | 1.771637000  |
| C | -0.047366000 | -5.650746000  | 1.273201000  |
| C | 0.429689000  | -7.903833000  | 2.209202000  |
| H | 1.532383000  | -6.140113000  | 2.658114000  |
| H | -0.784984000 | -5.455103000  | 2.057343000  |
| H | 0.383997000  | -4.693084000  | 0.962652000  |
| H | -0.562401000 | -6.092392000  | 0.413710000  |

|   |              |              |             |
|---|--------------|--------------|-------------|
| H | 2.325794000  | -6.064424000 | 0.246796000 |
| H | 1.748085000  | -7.598395000 | 0.150135000 |
| H | -0.555210000 | -8.673356000 | 3.657049000 |

**Adduct 7AlaB<sub>a</sub>:**

|   |              |               |              |
|---|--------------|---------------|--------------|
| O | -4.639366000 | -11.233900000 | 3.797372000  |
| S | -3.367655000 | -10.706917000 | 3.268262000  |
| C | -2.169313000 | -10.975154000 | 4.568997000  |
| O | -3.230435000 | -9.310651000  | 2.840880000  |
| C | -2.839677000 | -11.781354000 | 1.933462000  |
| N | -1.061477000 | -10.234058000 | 4.600122000  |
| C | -1.708729000 | -11.443503000 | 1.183921000  |
| C | -3.584875000 | -12.926761000 | 1.654644000  |
| C | -0.963637000 | -11.660687000 | 6.328197000  |
| N | -0.335634000 | -10.647629000 | 5.659281000  |
| C | -1.328258000 | -12.284953000 | 0.142652000  |
| H | -1.131668000 | -10.548961000 | 1.402033000  |
| C | -3.187071000 | -13.750019000 | 0.602359000  |
| H | -4.464693000 | -13.153437000 | 2.246291000  |
| C | -0.949685000 | -12.562504000 | 7.417513000  |
| H | 0.535703000  | -10.181941000 | 5.858652000  |
| C | -2.057289000 | -13.443985000 | -0.167568000 |
| H | -0.447937000 | -12.032023000 | -0.442003000 |
| H | -3.764768000 | -14.642016000 | 0.375842000  |
| C | -1.642727000 | -14.323754000 | -1.321630000 |
| H | -2.101697000 | -15.313914000 | -1.257953000 |
| H | -1.944893000 | -13.880541000 | -2.278268000 |
| H | -0.556360000 | -14.451675000 | -1.355129000 |
| N | -2.803958000 | -12.893247000 | 6.324395000  |
| C | -2.160091000 | -11.901783000 | 5.643927000  |
| N | -2.063073000 | -13.294477000 | 7.388061000  |
| C | -4.054501000 | -13.568428000 | 6.016278000  |
| H | -0.221594000 | -12.711450000 | 8.200730000  |
| H | -3.875912000 | -14.457852000 | 5.402920000  |
| H | -4.701984000 | -12.877020000 | 5.476876000  |
| H | -4.515467000 | -13.868862000 | 6.957290000  |
| O | -0.086615000 | -7.830152000  | 3.436883000  |
| O | 0.358998000  | -8.884253000  | 1.487841000  |
| N | 2.111502000  | -6.895849000  | 0.791185000  |
| C | 1.071816000  | -6.592701000  | 1.771637000  |
| C | -0.047366000 | -5.650746000  | 1.273201000  |
| C | 0.429689000  | -7.903833000  | 2.209202000  |
| H | 1.532383000  | -6.140113000  | 2.658114000  |

|   |              |              |             |
|---|--------------|--------------|-------------|
| H | -0.784984000 | -5.455103000 | 2.057343000 |
| H | 0.383997000  | -4.693084000 | 0.962652000 |
| H | -0.562401000 | -6.092392000 | 0.413710000 |
| H | 2.325794000  | -6.064424000 | 0.246796000 |
| H | 1.748085000  | -7.598395000 | 0.150135000 |
| H | -0.555210000 | -8.673356000 | 3.657049000 |

**Adduct 7AlaB<sub>6</sub>:**

|   |              |               |              |
|---|--------------|---------------|--------------|
| O | -4.144398000 | -12.132113000 | 3.129992000  |
| S | -2.925981000 | -11.361371000 | 2.818828000  |
| C | -2.056403000 | -11.212264000 | 4.375637000  |
| O | -2.992282000 | -10.018422000 | 2.233638000  |
| C | -1.869606000 | -12.390820000 | 1.799803000  |
| N | -1.158943000 | -10.239271000 | 4.534005000  |
| C | -0.696149000 | -11.854173000 | 1.261622000  |
| C | -2.253258000 | -13.707712000 | 1.546414000  |
| C | -1.217911000 | -11.413998000 | 6.443650000  |
| N | -0.653840000 | -10.361539000 | 5.778958000  |
| C | 0.099323000  | -12.669380000 | 0.461476000  |
| H | -0.399799000 | -10.827887000 | 1.459682000  |
| C | -1.443192000 | -14.501885000 | 0.736676000  |
| H | -3.176031000 | -14.089958000 | 1.968074000  |
| C | -1.299390000 | -12.168250000 | 7.637149000  |
| H | 0.030922000  | -9.690079000  | 6.089208000  |
| C | -0.258717000 | -13.997804000 | 0.183141000  |
| H | 1.015614000  | -12.261522000 | 0.043489000  |
| H | -1.737100000 | -15.527516000 | 0.530708000  |
| C | 0.602586000  | -14.852571000 | -0.714254000 |
| H | 0.402914000  | -15.917486000 | -0.567830000 |
| H | 0.412831000  | -14.623942000 | -1.770110000 |
| H | 1.666922000  | -14.675504000 | -0.532355000 |
| N | -2.718741000 | -13.028592000 | 6.227144000  |
| C | -2.134061000 | -11.993137000 | 5.558494000  |
| N | -2.203043000 | -13.134707000 | 7.477734000  |
| C | -3.690539000 | -14.004186000 | 5.759409000  |
| H | -0.775482000 | -12.062953000 | 8.575323000  |
| H | -3.188879000 | -14.893408000 | 5.363480000  |
| H | -4.295179000 | -13.546914000 | 4.976310000  |
| H | -4.314284000 | -14.291929000 | 6.605901000  |
| O | -0.279203000 | -7.819869000  | 3.369611000  |
| O | 0.725185000  | -8.890970000  | 1.651315000  |
| N | 2.337641000  | -6.720420000  | 1.211943000  |
| C | 1.074361000  | -6.514383000  | 1.915993000  |
| C | -0.006389000 | -5.749943000  | 1.118768000  |
| C | 0.510654000  | -7.878698000  | 2.295527000  |

|   |              |              |             |
|---|--------------|--------------|-------------|
| H | 1.265190000  | -5.967179000 | 2.847187000 |
| H | -0.918724000 | -5.617146000 | 1.708049000 |
| H | 0.368340000  | -4.759115000 | 0.840584000 |
| H | -0.260150000 | -6.292920000 | 0.202330000 |
| H | 2.568306000  | -5.894100000 | 0.666638000 |
| H | 2.216884000  | -7.494751000 | 0.562053000 |
| H | -0.676034000 | -8.709335000 | 3.547184000 |

**Adduct 7AlaB<sub>c</sub>:**

|   |              |               |              |
|---|--------------|---------------|--------------|
| O | -4.098274000 | -9.457132000  | 6.646963000  |
| S | -3.347403000 | -9.222539000  | 5.399485000  |
| C | -2.067799000 | -10.472868000 | 5.379886000  |
| O | -2.695808000 | -7.938245000  | 5.122821000  |
| C | -4.419222000 | -9.642628000  | 4.025200000  |
| N | -0.975457000 | -10.279294000 | 4.640526000  |
| C | -3.987099000 | -9.404536000  | 2.716779000  |
| C | -5.677981000 | -10.181139000 | 4.291341000  |
| C | -0.761979000 | -12.274275000 | 5.642947000  |
| N | -0.189916000 | -11.364582000 | 4.798556000  |
| C | -4.843012000 | -9.725586000  | 1.667278000  |
| H | -3.007395000 | -8.981739000  | 2.511876000  |
| C | -6.519396000 | -10.488183000 | 3.223181000  |
| H | -5.989867000 | -10.340164000 | 5.317460000  |
| C | -0.656381000 | -13.516889000 | 6.309791000  |
| H | 0.701262000  | -11.387462000 | 4.328200000  |
| C | -6.117367000 | -10.266885000 | 1.899466000  |
| H | -4.513022000 | -9.547953000  | 0.647349000  |
| H | -7.503417000 | -10.903921000 | 3.422040000  |
| C | -7.039301000 | -10.578625000 | 0.745945000  |
| H | -7.844601000 | -11.254326000 | 1.046032000  |
| H | -7.503123000 | -9.663393000  | 0.358482000  |
| H | -6.496530000 | -11.040768000 | -0.084392000 |
| N | -2.550227000 | -12.620333000 | 6.903247000  |
| C | -1.987912000 | -11.727676000 | 6.038449000  |
| N | -1.745762000 | -13.702524000 | 7.054681000  |
| C | -3.845687000 | -12.583112000 | 7.562972000  |
| H | 0.127083000  | -14.259696000 | 6.297606000  |
| H | -4.604806000 | -13.090883000 | 6.958773000  |
| H | -4.132964000 | -11.542141000 | 7.711070000  |
| H | -3.750553000 | -13.093719000 | 8.521393000  |
| O | 0.386944000  | -8.209682000  | 3.267839000  |
| O | -1.116681000 | -8.221204000  | 1.580479000  |
| N | 0.701920000  | -7.022303000  | -0.079875000 |
| C | 0.880012000  | -6.877172000  | 1.362780000  |
| C | 0.606457000  | -5.462124000  | 1.920516000  |

|   |              |              |              |
|---|--------------|--------------|--------------|
| C | -0.058249000 | -7.854341000 | 2.061259000  |
| H | 1.905750000  | -7.158850000 | 1.630128000  |
| H | 0.771863000  | -5.419220000 | 3.001253000  |
| H | 1.276154000  | -4.738880000 | 1.443024000  |
| H | -0.426840000 | -5.163816000 | 1.714663000  |
| H | 1.044378000  | -6.191762000 | -0.555684000 |
| H | -0.295278000 | -7.097739000 | -0.270768000 |
| H | -0.278511000 | -8.788981000 | 3.716515000  |

**Adduct 7AlaB6:**

|   |              |               |              |
|---|--------------|---------------|--------------|
| O | -4.604490000 | -11.175054000 | 3.767244000  |
| S | -3.318186000 | -10.684302000 | 3.252618000  |
| C | -2.137467000 | -10.985962000 | 4.567665000  |
| O | -3.140774000 | -9.298649000  | 2.824377000  |
| C | -2.807580000 | -11.775925000 | 1.920190000  |
| N | -1.011175000 | -10.279494000 | 4.608017000  |
| C | -1.703394000 | -11.433448000 | 1.140003000  |
| C | -3.537215000 | -12.937562000 | 1.680022000  |
| C | -0.968922000 | -11.706342000 | 6.333738000  |
| N | -0.305750000 | -10.712483000 | 5.670624000  |
| C | -1.331011000 | -12.285966000 | 0.106409000  |
| H | -1.139469000 | -10.526503000 | 1.328093000  |
| C | -3.149549000 | -13.771683000 | 0.635248000  |
| H | -4.399806000 | -13.169310000 | 2.291779000  |
| C | -0.990140000 | -12.603168000 | 7.424906000  |
| H | 0.577740000  | -10.275196000 | 5.878861000  |
| C | -2.044396000 | -13.461059000 | -0.165330000 |
| H | -0.470074000 | -12.027355000 | -0.500805000 |
| H | -3.717290000 | -14.675143000 | 0.439223000  |
| C | -1.647610000 | -14.352818000 | -1.315015000 |
| H | -1.987530000 | -15.379063000 | -1.161541000 |
| H | -2.090703000 | -13.995189000 | -2.250814000 |
| H | -0.564052000 | -14.366890000 | -1.452230000 |
| N | -2.844978000 | -12.880581000 | 6.319510000  |
| C | -2.165679000 | -11.912425000 | 5.641788000  |
| N | -2.124027000 | -13.297914000 | 7.386352000  |
| C | -4.116500000 | -13.516650000 | 6.006491000  |
| H | -0.275350000 | -12.774438000 | 8.213326000  |
| H | -3.957938000 | -14.422679000 | 5.415587000  |
| H | -4.730070000 | -12.814116000 | 5.445455000  |
| H | -4.602133000 | -13.779503000 | 6.944679000  |
| O | 0.011707000  | -7.871193000  | 3.447466000  |
| O | 0.413784000  | -8.875876000  | 1.473256000  |
| N | 2.077329000  | -6.809295000  | 0.744778000  |
| C | 1.057799000  | -6.566223000  | 1.762842000  |

|   |              |              |             |
|---|--------------|--------------|-------------|
| C | -0.105276000 | -5.651501000 | 1.318552000 |
| C | 0.478621000  | -7.905051000 | 2.197297000 |
| H | 1.532419000  | -6.116731000 | 2.640249000 |
| H | -0.821195000 | -5.494852000 | 2.129173000 |
| H | 0.289832000  | -4.676759000 | 1.018906000 |
| H | -0.631829000 | -6.087777000 | 0.465407000 |
| H | 2.273935000  | -5.963970000 | 0.220513000 |
| H | 1.753664000  | -7.521475000 | 0.096682000 |
| H | -0.438300000 | -8.720282000 | 3.672562000 |

**Adduct 7AlaB6<sub>a</sub>:**

|   |              |               |              |
|---|--------------|---------------|--------------|
| O | -4.604490000 | -11.175054000 | 3.767244000  |
| S | -3.318186000 | -10.684302000 | 3.252618000  |
| C | -2.137467000 | -10.985962000 | 4.567665000  |
| O | -3.140774000 | -9.298649000  | 2.824377000  |
| C | -2.807580000 | -11.775925000 | 1.920190000  |
| N | -1.011175000 | -10.279494000 | 4.608017000  |
| C | -1.703394000 | -11.433448000 | 1.140003000  |
| C | -3.537215000 | -12.937562000 | 1.680022000  |
| C | -0.968922000 | -11.706342000 | 6.333738000  |
| N | -0.305750000 | -10.712483000 | 5.670624000  |
| C | -1.331011000 | -12.285966000 | 0.106409000  |
| H | -1.139469000 | -10.526503000 | 1.328093000  |
| C | -3.149549000 | -13.771683000 | 0.635248000  |
| H | -4.399806000 | -13.169310000 | 2.291779000  |
| C | -0.990140000 | -12.603168000 | 7.424906000  |
| H | 0.577740000  | -10.275196000 | 5.878861000  |
| C | -2.044396000 | -13.461059000 | -0.165330000 |
| H | -0.470074000 | -12.027355000 | -0.500805000 |
| H | -3.717290000 | -14.675143000 | 0.439223000  |
| C | -1.647610000 | -14.352818000 | -1.315015000 |
| H | -1.987530000 | -15.379063000 | -1.161541000 |
| H | -2.090703000 | -13.995189000 | -2.250814000 |
| H | -0.564052000 | -14.366890000 | -1.452230000 |
| N | -2.844978000 | -12.880581000 | 6.319510000  |
| C | -2.165679000 | -11.912425000 | 5.641788000  |
| N | -2.124027000 | -13.297914000 | 7.386352000  |
| C | -4.116500000 | -13.516650000 | 6.006491000  |
| H | -0.275350000 | -12.774438000 | 8.213326000  |
| H | -3.957938000 | -14.422679000 | 5.415587000  |
| H | -4.730070000 | -12.814116000 | 5.445455000  |
| H | -4.602133000 | -13.779503000 | 6.944679000  |
| O | 0.011707000  | -7.871193000  | 3.447466000  |
| O | 0.413784000  | -8.875876000  | 1.473256000  |
| N | 2.077329000  | -6.809295000  | 0.744778000  |

|   |              |              |             |
|---|--------------|--------------|-------------|
| C | 1.057799000  | -6.566223000 | 1.762842000 |
| C | -0.105276000 | -5.651501000 | 1.318552000 |
| C | 0.478621000  | -7.905051000 | 2.197297000 |
| H | 1.532419000  | -6.116731000 | 2.640249000 |
| H | -0.821195000 | -5.494852000 | 2.129173000 |
| H | 0.289832000  | -4.676759000 | 1.018906000 |
| H | -0.631829000 | -6.087777000 | 0.465407000 |
| H | 2.273935000  | -5.963970000 | 0.220513000 |
| H | 1.753664000  | -7.521475000 | 0.096682000 |
| H | -0.438300000 | -8.720282000 | 3.672562000 |

**Adduct 7AlaB<sub>6</sub>:**

|   |              |               |              |
|---|--------------|---------------|--------------|
| O | -4.097313000 | -12.044778000 | 3.071545000  |
| S | -2.848835000 | -11.317311000 | 2.801309000  |
| C | -2.013086000 | -11.214273000 | 4.384599000  |
| O | -2.852206000 | -9.973474000  | 2.228036000  |
| C | -1.802208000 | -12.376524000 | 1.796283000  |
| N | -1.097315000 | -10.269425000 | 4.578739000  |
| C | -0.633632000 | -11.855425000 | 1.240275000  |
| C | -2.188363000 | -13.695976000 | 1.576035000  |
| C | -1.234454000 | -11.466267000 | 6.466581000  |
| N | -0.626584000 | -10.420103000 | 5.831794000  |
| C | 0.156470000  | -12.688291000 | 0.456100000  |
| H | -0.337997000 | -10.826382000 | 1.411915000  |
| C | -1.384389000 | -14.508861000 | 0.781491000  |
| H | -3.109580000 | -14.068093000 | 2.005918000  |
| C | -1.366988000 | -12.229221000 | 7.647986000  |
| H | 0.067609000  | -9.773695000  | 6.171586000  |
| C | -0.203593000 | -14.020574000 | 0.211293000  |
| H | 1.068695000  | -12.290173000 | 0.024512000  |
| H | -1.682857000 | -15.535937000 | 0.600231000  |
| C | 0.650672000  | -14.895676000 | -0.671302000 |
| H | 0.443126000  | -15.954782000 | -0.506647000 |
| H | 0.459836000  | -14.681072000 | -1.728268000 |
| H | 1.714525000  | -14.722677000 | -0.491933000 |
| N | -2.772198000 | -13.034387000 | 6.193334000  |
| C | -2.142185000 | -12.009232000 | 5.552878000  |
| N | -2.291288000 | -13.165661000 | 7.451682000  |
| C | -3.763071000 | -13.975254000 | 5.690802000  |
| H | -0.866488000 | -12.151691000 | 8.599487000  |
| H | -3.278537000 | -14.885752000 | 5.328338000  |
| H | -4.312330000 | -13.501856000 | 4.879098000  |
| H | -4.436766000 | -14.227383000 | 6.508079000  |
| O | -0.208857000 | -7.827419000  | 3.402213000  |
| O | 0.791263000  | -8.867801000  | 1.674077000  |

|   |              |              |             |
|---|--------------|--------------|-------------|
| N | 2.261795000  | -6.609118000 | 1.135987000 |
| C | 1.015835000  | -6.472068000 | 1.886374000 |
| C | -0.131222000 | -5.768373000 | 1.127753000 |
| C | 0.543542000  | -7.858881000 | 2.299256000 |
| H | 1.214450000  | -5.910554000 | 2.804429000 |
| H | -1.024022000 | -5.677916000 | 1.751306000 |
| H | 0.185285000  | -4.762720000 | 0.836952000 |
| H | -0.390827000 | -6.323720000 | 0.222288000 |
| H | 2.449129000  | -5.775806000 | 0.589633000 |
| H | 2.198036000  | -7.401253000 | 0.503245000 |
| H | -0.569111000 | -8.724282000 | 3.603292000 |

**Adduct 7AlaB6<sub>c</sub>:**

|   |              |               |              |
|---|--------------|---------------|--------------|
| O | -4.230806000 | -9.812342000  | 6.677874000  |
| S | -3.468310000 | -9.418780000  | 5.485081000  |
| C | -2.147951000 | -10.626849000 | 5.361202000  |
| O | -2.852781000 | -8.099534000  | 5.361922000  |
| C | -4.502526000 | -9.694116000  | 4.041338000  |
| N | -1.136425000 | -10.378079000 | 4.536856000  |
| C | -4.158322000 | -9.087364000  | 2.833720000  |
| C | -5.645110000 | -10.480681000 | 4.156252000  |
| C | -0.737381000 | -12.352219000 | 5.523928000  |
| N | -0.291157000 | -11.423781000 | 4.623827000  |
| C | -4.972419000 | -9.293689000  | 1.725450000  |
| H | -3.287033000 | -8.446648000  | 2.762181000  |
| C | -6.448192000 | -10.671236000 | 3.034672000  |
| H | -5.908489000 | -10.913864000 | 5.112586000  |
| C | -0.515010000 | -13.586029000 | 6.174160000  |
| H | 0.574721000  | -11.389439000 | 4.107935000  |
| C | -6.123250000 | -10.089291000 | 1.804606000  |
| H | -4.714360000 | -8.815829000  | 0.786254000  |
| H | -7.346166000 | -11.273402000 | 3.121569000  |
| C | -6.981835000 | -10.320698000 | 0.586428000  |
| H | -7.997273000 | -10.611213000 | 0.862891000  |
| H | -7.038473000 | -9.423960000  | -0.034754000 |
| H | -6.565813000 | -11.121874000 | -0.033911000 |
| N | -2.395384000 | -12.788716000 | 6.922452000  |
| C | -1.952966000 | -11.871561000 | 6.016269000  |
| N | -1.526985000 | -13.822466000 | 7.005835000  |
| C | -3.623511000 | -12.806124000 | 7.704203000  |
| H | 0.298768000  | -14.288625000 | 6.097836000  |
| H | -4.341384000 | -13.506195000 | 7.269684000  |
| H | -4.038908000 | -11.800202000 | 7.714858000  |
| H | -3.385976000 | -13.120328000 | 8.719932000  |
| O | 0.169218000  | -8.449248000  | 3.039534000  |

|   |              |              |              |
|---|--------------|--------------|--------------|
| O | -1.466301000 | -7.750109000 | 1.664306000  |
| N | 0.400686000  | -6.656539000 | -0.029356000 |
| C | 0.762108000  | -6.860506000 | 1.367631000  |
| C | 0.913414000  | -5.570925000 | 2.208451000  |
| C | -0.309257000 | -7.729152000 | 2.011271000  |
| H | 1.705018000  | -7.413643000 | 1.416422000  |
| H | 1.206404000  | -5.797334000 | 3.236722000  |
| H | 1.685491000  | -4.936239000 | 1.764861000  |
| H | -0.025307000 | -5.010676000 | 2.223858000  |
| H | 0.935846000  | -5.900327000 | -0.439095000 |
| H | -0.587804000 | -6.439970000 | -0.109945000 |
| H | -0.574806000 | -8.909491000 | 3.479734000  |

**Adduct 7AlaC:**

|   |              |               |              |
|---|--------------|---------------|--------------|
| O | -4.541589000 | -11.075495000 | 3.766341000  |
| S | -3.242606000 | -10.625700000 | 3.259539000  |
| C | -2.089932000 | -10.957142000 | 4.566573000  |
| O | -3.016429000 | -9.248642000  | 2.839948000  |
| C | -2.762395000 | -11.721436000 | 1.945985000  |
| N | -0.969489000 | -10.256457000 | 4.640852000  |
| C | -1.615980000 | -11.440730000 | 1.207050000  |
| C | -3.552479000 | -12.830126000 | 1.672808000  |
| C | -0.954831000 | -11.714903000 | 6.327289000  |
| N | -0.283141000 | -10.708874000 | 5.698790000  |
| C | -1.265994000 | -12.304367000 | 0.181029000  |
| H | -1.005068000 | -10.568355000 | 1.423615000  |
| C | -3.184185000 | -13.677336000 | 0.636269000  |
| H | -4.446357000 | -13.009052000 | 2.258824000  |
| C | -0.994748000 | -12.641085000 | 7.393389000  |
| H | 0.598282000  | -10.278016000 | 5.925592000  |
| C | -2.040327000 | -13.428163000 | -0.121918000 |
| H | -0.372319000 | -12.097667000 | -0.400015000 |
| H | -3.797165000 | -14.544660000 | 0.411297000  |
| C | -1.655133000 | -14.334088000 | -1.259969000 |
| H | -2.172998000 | -15.293606000 | -1.201616000 |
| H | -1.909718000 | -13.877711000 | -2.222090000 |
| H | -0.579189000 | -14.525923000 | -1.267419000 |
| N | -2.821410000 | -12.886872000 | 6.254689000  |
| C | -2.133601000 | -11.903503000 | 5.617523000  |
| N | -2.122848000 | -13.330193000 | 7.317365000  |
| C | -4.084377000 | -13.503652000 | 5.902536000  |
| H | -0.290860000 | -12.832226000 | 8.188600000  |
| H | -3.925384000 | -14.381507000 | 5.270052000  |
| H | -4.692779000 | -12.773868000 | 5.369227000  |
| H | -4.577985000 | -13.809801000 | 6.823652000  |

|   |              |              |             |
|---|--------------|--------------|-------------|
| O | -0.064866000 | -7.845938000 | 3.456537000 |
| O | 0.403746000  | -8.927736000 | 1.542953000 |
| N | 2.000165000  | -6.890363000 | 0.724448000 |
| C | 1.011283000  | -6.609620000 | 1.751451000 |
| C | -0.157444000 | -5.718196000 | 1.302155000 |
| C | 0.437018000  | -7.928214000 | 2.232875000 |
| H | 1.498279000  | -6.134709000 | 2.610414000 |
| H | -0.860801000 | -5.542360000 | 2.119535000 |
| H | 0.221921000  | -4.750670000 | 0.960980000 |
| H | -0.696670000 | -6.188574000 | 0.474819000 |
| H | 2.141515000  | -6.075301000 | 0.137599000 |
| H | 1.652555000  | -7.646255000 | 0.141179000 |
| H | -0.496699000 | -8.698766000 | 3.703405000 |

**Adduct 7AlaC<sub>a</sub>:**

|   |              |               |              |
|---|--------------|---------------|--------------|
| O | -4.541589000 | -11.075495000 | 3.766341000  |
| S | -3.242606000 | -10.625700000 | 3.259539000  |
| C | -2.089932000 | -10.957142000 | 4.566573000  |
| O | -3.016429000 | -9.248642000  | 2.839948000  |
| C | -2.762395000 | -11.721436000 | 1.945985000  |
| N | -0.969489000 | -10.256457000 | 4.640852000  |
| C | -1.615980000 | -11.440730000 | 1.207050000  |
| C | -3.552479000 | -12.830126000 | 1.672808000  |
| C | -0.954831000 | -11.714903000 | 6.327289000  |
| N | -0.283141000 | -10.708874000 | 5.698790000  |
| C | -1.265994000 | -12.304367000 | 0.181029000  |
| H | -1.005068000 | -10.568355000 | 1.423615000  |
| C | -3.184185000 | -13.677336000 | 0.636269000  |
| H | -4.446357000 | -13.009052000 | 2.258824000  |
| C | -0.994748000 | -12.641085000 | 7.393389000  |
| H | 0.598282000  | -10.278016000 | 5.925592000  |
| C | -2.040327000 | -13.428163000 | -0.121918000 |
| H | -0.372319000 | -12.097667000 | -0.400015000 |
| H | -3.797165000 | -14.544660000 | 0.411297000  |
| C | -1.655133000 | -14.334088000 | -1.259969000 |
| H | -2.172998000 | -15.293606000 | -1.201616000 |
| H | -1.909718000 | -13.877711000 | -2.222090000 |
| H | -0.579189000 | -14.525923000 | -1.267419000 |
| N | -2.821410000 | -12.886872000 | 6.254689000  |
| C | -2.133601000 | -11.903503000 | 5.617523000  |
| N | -2.122848000 | -13.330193000 | 7.317365000  |
| C | -4.084377000 | -13.503652000 | 5.902536000  |
| H | -0.290860000 | -12.832226000 | 8.188600000  |
| H | -3.925384000 | -14.381507000 | 5.270052000  |
| H | -4.692779000 | -12.773868000 | 5.369227000  |

|   |              |               |             |
|---|--------------|---------------|-------------|
| H | -4.577985000 | -13.809801000 | 6.823652000 |
| O | -0.064866000 | -7.845938000  | 3.456537000 |
| O | 0.403746000  | -8.927736000  | 1.542953000 |
| N | 2.000165000  | -6.890363000  | 0.724448000 |
| C | 1.011283000  | -6.609620000  | 1.751451000 |
| C | -0.157444000 | -5.718196000  | 1.302155000 |
| C | 0.437018000  | -7.928214000  | 2.232875000 |
| H | 1.498279000  | -6.134709000  | 2.610414000 |
| H | -0.860801000 | -5.542360000  | 2.119535000 |
| H | 0.221921000  | -4.750670000  | 0.960980000 |
| H | -0.696670000 | -6.188574000  | 0.474819000 |
| H | 2.141515000  | -6.075301000  | 0.137599000 |
| H | 1.652555000  | -7.646255000  | 0.141179000 |
| H | -0.496699000 | -8.698766000  | 3.703405000 |

**Adduct 7AlaC<sub>b</sub>:**

|   |              |               |              |
|---|--------------|---------------|--------------|
| O | -4.046647000 | -11.850298000 | 3.094281000  |
| S | -2.762680000 | -11.191142000 | 2.842493000  |
| C | -1.936362000 | -11.160977000 | 4.412198000  |
| O | -2.685738000 | -9.840101000  | 2.302132000  |
| C | -1.780695000 | -12.277938000 | 1.837036000  |
| N | -1.015115000 | -10.239777000 | 4.645667000  |
| C | -0.556332000 | -11.832225000 | 1.345391000  |
| C | -2.262900000 | -13.547917000 | 1.549740000  |
| C | -1.166809000 | -11.506437000 | 6.474157000  |
| N | -0.549175000 | -10.443515000 | 5.885183000  |
| C | 0.190296000  | -12.694300000 | 0.557839000  |
| H | -0.188916000 | -10.834270000 | 1.569434000  |
| C | -1.499063000 | -14.391217000 | 0.753791000  |
| H | -3.227753000 | -13.855776000 | 1.935430000  |
| C | -1.308717000 | -12.321497000 | 7.619342000  |
| H | 0.154049000  | -9.820473000  | 6.247531000  |
| C | -0.266086000 | -13.979071000 | 0.248791000  |
| H | 1.148034000  | -12.359131000 | 0.171309000  |
| H | -1.868405000 | -15.384765000 | 0.519169000  |
| C | 0.551927000  | -14.886156000 | -0.630063000 |
| H | 0.199683000  | -15.918355000 | -0.578973000 |
| H | 0.496177000  | -14.567217000 | -1.675899000 |
| H | 1.606487000  | -14.870341000 | -0.342953000 |
| N | -2.713005000 | -13.041645000 | 6.135138000  |
| C | -2.074218000 | -11.997957000 | 5.544682000  |
| N | -2.238423000 | -13.233649000 | 7.380796000  |
| C | -3.713349000 | -13.936331000 | 5.588914000  |
| H | -0.806527000 | -12.290515000 | 8.573908000  |
| H | -3.244274000 | -14.816640000 | 5.140640000  |

|   |              |               |             |
|---|--------------|---------------|-------------|
| H | -4.284597000 | -13.400362000 | 4.831538000 |
| H | -4.363993000 | -14.251966000 | 6.403104000 |
| O | -0.253173000 | -7.813202000  | 3.405537000 |
| O | 0.817178000  | -8.927523000  | 1.773190000 |
| N | 2.207346000  | -6.701067000  | 1.089162000 |
| C | 0.982017000  | -6.528717000  | 1.850675000 |
| C | -0.180506000 | -5.887519000  | 1.076352000 |
| C | 0.527990000  | -7.891478000  | 2.337739000 |
| H | 1.183767000  | -5.918528000  | 2.738224000 |
| H | -1.066161000 | -5.779311000  | 1.706875000 |
| H | 0.111462000  | -4.895206000  | 0.720597000 |
| H | -0.443939000 | -6.500774000  | 0.209657000 |
| H | 2.345723000  | -5.918000000  | 0.459606000 |
| H | 2.124194000  | -7.546902000  | 0.532412000 |
| H | -0.588807000 | -8.709928000  | 3.646806000 |

**Adduct 7AlaC<sub>c</sub>:**

|   |              |               |             |
|---|--------------|---------------|-------------|
| O | -3.927450000 | -9.314805000  | 6.541111000 |
| S | -3.196233000 | -9.188906000  | 5.277802000 |
| C | -1.978320000 | -10.478365000 | 5.310900000 |
| O | -2.498856000 | -7.962493000  | 4.913256000 |
| C | -4.299731000 | -9.646915000  | 3.962748000 |
| N | -0.870110000 | -10.346951000 | 4.599415000 |
| C | -3.883838000 | -9.504235000  | 2.641171000 |
| C | -5.565793000 | -10.119454000 | 4.281266000 |
| C | -0.762817000 | -12.316129000 | 5.639783000 |
| N | -0.135403000 | -11.450338000 | 4.794115000 |
| C | -4.765120000 | -9.857639000  | 1.631673000 |
| H | -2.895666000 | -9.121648000  | 2.399571000 |
| C | -6.432871000 | -10.461531000 | 3.251913000 |
| H | -5.864615000 | -10.196361000 | 5.320171000 |
| C | -0.726713000 | -13.546713000 | 6.332856000 |
| H | 0.761133000  | -11.522348000 | 4.341341000 |
| C | -6.045478000 | -10.340961000 | 1.917688000 |
| H | -4.452831000 | -9.748814000  | 0.597435000 |
| H | -7.428504000 | -10.823184000 | 3.489595000 |
| C | -6.976993000 | -10.733033000 | 0.802810000 |
| H | -8.000512000 | -10.858972000 | 1.161381000 |
| H | -6.983357000 | -9.980603000  | 0.010005000 |
| H | -6.664332000 | -11.678982000 | 0.348804000 |
| N | -2.583596000 | -12.562603000 | 6.859150000 |
| C | -1.964395000 | -11.716966000 | 5.994647000 |
| N | -1.834069000 | -13.665309000 | 7.049069000 |
| C | -3.883647000 | -12.445615000 | 7.488137000 |
| H | 0.022609000  | -14.322882000 | 6.353710000 |

|   |              |               |              |
|---|--------------|---------------|--------------|
| H | -4.654416000 | -12.927649000 | 6.880298000  |
| H | -4.119232000 | -11.388482000 | 7.607370000  |
| H | -3.834050000 | -12.935718000 | 8.459346000  |
| O | 0.393230000  | -8.178184000  | 3.288039000  |
| O | -1.050390000 | -8.340375000  | 1.573194000  |
| N | 0.593054000  | -6.878610000  | -0.016260000 |
| C | 0.768920000  | -6.773826000  | 1.422289000  |
| C | 0.356004000  | -5.424463000  | 2.031429000  |
| C | -0.058047000 | -7.859786000  | 2.083477000  |
| H | 1.817242000  | -6.962690000  | 1.679099000  |
| H | 0.518214000  | -5.409740000  | 3.111773000  |
| H | 0.944597000  | -4.618200000  | 1.584214000  |
| H | -0.702283000 | -5.228084000  | 1.836412000  |
| H | 0.814549000  | -5.996243000  | -0.464679000 |
| H | -0.381009000 | -7.096693000  | -0.206033000 |
| H | -0.214868000 | -8.827796000  | 3.716040000  |

**Adduct 7AlaP:**

|   |              |               |              |
|---|--------------|---------------|--------------|
| O | -4.585991000 | -11.117474000 | 3.771430000  |
| S | -3.297109000 | -10.640560000 | 3.261395000  |
| C | -2.130906000 | -10.951678000 | 4.560397000  |
| O | -3.098425000 | -9.259427000  | 2.837960000  |
| C | -2.796114000 | -11.728347000 | 1.949805000  |
| N | -1.016724000 | -10.232065000 | 4.623790000  |
| C | -1.649553000 | -11.429894000 | 1.214368000  |
| C | -3.570810000 | -12.849834000 | 1.672501000  |
| C | -0.959385000 | -11.691675000 | 6.308557000  |
| N | -0.316071000 | -10.675957000 | 5.671577000  |
| C | -1.283925000 | -12.287580000 | 0.186210000  |
| H | -1.049143000 | -10.549535000 | 1.435923000  |
| C | -3.187229000 | -13.689917000 | 0.633344000  |
| H | -4.464150000 | -13.041584000 | 2.257905000  |
| C | -0.973516000 | -12.618393000 | 7.372093000  |
| H | 0.560454000  | -10.232083000 | 5.889396000  |
| C | -2.042695000 | -13.423235000 | -0.122969000 |
| H | -0.389910000 | -12.066553000 | -0.391085000 |
| H | -3.788271000 | -14.566065000 | 0.404505000  |
| C | -1.644213000 | -14.318884000 | -1.260564000 |
| H | -2.134059000 | -15.293733000 | -1.195848000 |
| H | -1.922705000 | -13.871594000 | -2.221824000 |
| H | -0.562298000 | -14.479430000 | -1.280564000 |
| N | -2.807378000 | -12.893627000 | 6.254936000  |
| C | -2.147434000 | -11.899841000 | 5.608985000  |
| N | -2.093727000 | -13.327862000 | 7.307304000  |
| C | -4.057488000 | -13.532067000 | 5.913433000  |

|   |              |               |             |
|---|--------------|---------------|-------------|
| H | -0.259549000 | -12.800217000 | 8.161489000 |
| H | -3.886834000 | -14.405857000 | 5.276471000 |
| H | -4.685386000 | -12.812486000 | 5.386443000 |
| H | -4.537503000 | -13.850345000 | 6.838814000 |
| O | -0.083761000 | -7.836840000  | 3.453315000 |
| O | 0.409472000  | -8.929489000  | 1.548836000 |
| N | 2.039489000  | -6.908414000  | 0.761801000 |
| C | 1.034614000  | -6.617162000  | 1.766333000 |
| C | -0.119410000 | -5.718651000  | 1.295572000 |
| C | 0.438493000  | -7.929099000  | 2.239647000 |
| H | 1.508414000  | -6.142408000  | 2.635071000 |
| H | -0.837156000 | -5.533190000  | 2.099871000 |
| H | 0.274174000  | -4.754011000  | 0.958586000 |
| H | -0.648043000 | -6.186916000  | 0.458820000 |
| H | 2.186240000  | -6.096854000  | 0.171909000 |
| H | 1.688878000  | -7.660907000  | 0.175392000 |
| H | -0.526387000 | -8.686116000  | 3.692824000 |

**Adduct 7AlaP<sub>a</sub>:**

|   |              |               |              |
|---|--------------|---------------|--------------|
| O | -4.585991000 | -11.117474000 | 3.771430000  |
| S | -3.297109000 | -10.640560000 | 3.261395000  |
| C | -2.130906000 | -10.951678000 | 4.560397000  |
| O | -3.098425000 | -9.259427000  | 2.837960000  |
| C | -2.796114000 | -11.728347000 | 1.949805000  |
| N | -1.016724000 | -10.232065000 | 4.623790000  |
| C | -1.649553000 | -11.429894000 | 1.214368000  |
| C | -3.570810000 | -12.849834000 | 1.672501000  |
| C | -0.959385000 | -11.691675000 | 6.308557000  |
| N | -0.316071000 | -10.675957000 | 5.671577000  |
| C | -1.283925000 | -12.287580000 | 0.186210000  |
| H | -1.049143000 | -10.549535000 | 1.435923000  |
| C | -3.187229000 | -13.689917000 | 0.633344000  |
| H | -4.464150000 | -13.041584000 | 2.257905000  |
| C | -0.973516000 | -12.618393000 | 7.372093000  |
| H | 0.560454000  | -10.232083000 | 5.889396000  |
| C | -2.042695000 | -13.423235000 | -0.122969000 |
| H | -0.389910000 | -12.066553000 | -0.391085000 |
| H | -3.788271000 | -14.566065000 | 0.404505000  |
| C | -1.644213000 | -14.318884000 | -1.260564000 |
| H | -2.134059000 | -15.293733000 | -1.195848000 |
| H | -1.922705000 | -13.871594000 | -2.221824000 |
| H | -0.562298000 | -14.479430000 | -1.280564000 |
| N | -2.807378000 | -12.893627000 | 6.254936000  |
| C | -2.147434000 | -11.899841000 | 5.608985000  |
| N | -2.093727000 | -13.327862000 | 7.307304000  |

|   |              |               |             |
|---|--------------|---------------|-------------|
| C | -4.057488000 | -13.532067000 | 5.913433000 |
| H | -0.259549000 | -12.800217000 | 8.161489000 |
| H | -3.886834000 | -14.405857000 | 5.276471000 |
| H | -4.685386000 | -12.812486000 | 5.386443000 |
| H | -4.537503000 | -13.850345000 | 6.838814000 |
| O | -0.083761000 | -7.836840000  | 3.453315000 |
| O | 0.409472000  | -8.929489000  | 1.548836000 |
| N | 2.039489000  | -6.908414000  | 0.761801000 |
| C | 1.034614000  | -6.617162000  | 1.766333000 |
| C | -0.119410000 | -5.718651000  | 1.295572000 |
| C | 0.438493000  | -7.929099000  | 2.239647000 |
| H | 1.508414000  | -6.142408000  | 2.635071000 |
| H | -0.837156000 | -5.533190000  | 2.099871000 |
| H | 0.274174000  | -4.754011000  | 0.958586000 |
| H | -0.648043000 | -6.186916000  | 0.458820000 |
| H | 2.186240000  | -6.096854000  | 0.171909000 |
| H | 1.688878000  | -7.660907000  | 0.175392000 |
| H | -0.526387000 | -8.686116000  | 3.692824000 |

**Adduct 7AlaP<sub>b</sub>:**

|   |              |               |              |
|---|--------------|---------------|--------------|
| O | -4.092559000 | -11.921454000 | 3.095372000  |
| S | -2.827261000 | -11.231243000 | 2.827804000  |
| C | -1.987214000 | -11.163151000 | 4.388251000  |
| O | -2.786604000 | -9.885386000  | 2.268390000  |
| C | -1.822309000 | -12.305085000 | 1.832282000  |
| N | -1.082197000 | -10.215032000 | 4.600131000  |
| C | -0.605003000 | -11.837862000 | 1.337101000  |
| C | -2.280622000 | -13.588168000 | 1.553113000  |
| C | -1.178491000 | -11.462000000 | 6.445881000  |
| N | -0.598892000 | -10.394517000 | 5.832922000  |
| C | 0.158785000  | -12.691121000 | 0.553078000  |
| H | -0.255313000 | -10.830802000 | 1.556458000  |
| C | -1.500193000 | -14.421560000 | 0.759619000  |
| H | -3.240223000 | -13.911467000 | 1.943149000  |
| C | -1.285840000 | -12.265849000 | 7.600234000  |
| H | 0.093487000  | -9.751040000  | 6.178402000  |
| C | -0.273190000 | -13.988497000 | 0.250258000  |
| H | 1.110731000  | -12.338635000 | 0.164521000  |
| H | -1.851133000 | -15.424263000 | 0.530215000  |
| C | 0.559859000  | -14.883007000 | -0.622184000 |
| H | 0.220627000  | -15.920732000 | -0.574683000 |
| H | 0.506818000  | -14.563440000 | -1.669266000 |
| H | 1.613727000  | -14.853822000 | -0.329283000 |
| N | -2.689739000 | -13.039324000 | 6.145237000  |
| C | -2.088958000 | -11.989562000 | 5.530994000  |

|   |              |               |             |
|---|--------------|---------------|-------------|
| N | -2.197297000 | -13.206518000 | 7.384082000 |
| C | -3.666866000 | -13.965421000 | 5.621215000 |
| H | -0.774139000 | -12.212339000 | 8.549575000 |
| H | -3.176906000 | -14.838287000 | 5.178071000 |
| H | -4.260405000 | -13.454243000 | 4.862114000 |
| H | -4.301607000 | -14.289685000 | 6.445865000 |
| O | -0.281649000 | -7.805113000  | 3.383162000 |
| O | 0.802394000  | -8.925612000  | 1.760202000 |
| N | 2.248811000  | -6.720144000  | 1.135175000 |
| C | 1.014110000  | -6.531866000  | 1.872239000 |
| C | -0.120852000 | -5.856900000  | 1.087047000 |
| C | 0.520409000  | -7.890448000  | 2.332226000 |
| H | 1.209589000  | -5.936081000  | 2.773260000 |
| H | -1.016534000 | -5.735959000  | 1.703038000 |
| H | 0.199012000  | -4.865582000  | 0.749368000 |
| H | -0.382221000 | -6.453216000  | 0.206638000 |
| H | 2.402674000  | -5.937820000  | 0.508820000 |
| H | 2.152969000  | -7.559111000  | 0.569620000 |
| H | -0.635820000 | -8.698755000  | 3.608864000 |

#### Adduct 7AlaP<sub>c</sub>:

|   |              |               |              |
|---|--------------|---------------|--------------|
| O | -3.984553000 | -9.423013000  | 6.561997000  |
| S | -3.240332000 | -9.237767000  | 5.312754000  |
| C | -2.006281000 | -10.510989000 | 5.304761000  |
| O | -2.558054000 | -7.987625000  | 5.000371000  |
| C | -4.320520000 | -9.665131000  | 3.969212000  |
| N | -0.892233000 | -10.335128000 | 4.604254000  |
| C | -3.892839000 | -9.468203000  | 2.656296000  |
| C | -5.584146000 | -10.169661000 | 4.257920000  |
| C | -0.763120000 | -12.345461000 | 5.560298000  |
| N | -0.148008000 | -11.434378000 | 4.758382000  |
| C | -4.759968000 | -9.798973000  | 1.624164000  |
| H | -2.906699000 | -9.062013000  | 2.438715000  |
| C | -6.436560000 | -10.487202000 | 3.206542000  |
| H | -5.891139000 | -10.287542000 | 5.292041000  |
| C | -0.715339000 | -13.601935000 | 6.200018000  |
| H | 0.751791000  | -11.475296000 | 4.309613000  |
| C | -6.037618000 | -10.312890000 | 1.878701000  |
| H | -4.438215000 | -9.647586000  | 0.597066000  |
| H | -7.430182000 | -10.871818000 | 3.421053000  |
| C | -6.949497000 | -10.681474000 | 0.743826000  |
| H | -7.983666000 | -10.793067000 | 1.078997000  |
| H | -6.925605000 | -9.925198000  | -0.046254000 |
| H | -6.642781000 | -11.631601000 | 0.291217000  |
| N | -2.588100000 | -12.668718000 | 6.755281000  |

|   |              |               |              |
|---|--------------|---------------|--------------|
| C | -1.980092000 | -11.776733000 | 5.933819000  |
| N | -1.828556000 | -13.767015000 | 6.904272000  |
| C | -3.892622000 | -12.598452000 | 7.371933000  |
| H | 0.043971000  | -14.369642000 | 6.195558000  |
| H | -4.653391000 | -13.047716000 | 6.725547000  |
| H | -4.138536000 | -11.551088000 | 7.552274000  |
| H | -3.850777000 | -13.147131000 | 8.312779000  |
| O | 0.384623000  | -8.146538000  | 3.362438000  |
| O | -1.037787000 | -8.263365000  | 1.622589000  |
| N | 0.632809000  | -6.765945000  | 0.098500000  |
| C | 0.787816000  | -6.699088000  | 1.538963000  |
| C | 0.370150000  | -5.367356000  | 2.181394000  |
| C | -0.051354000 | -7.798899000  | 2.161090000  |
| H | 1.833613000  | -6.897030000  | 1.807080000  |
| H | 0.518143000  | -5.381988000  | 3.265004000  |
| H | 0.967618000  | -4.549734000  | 1.764734000  |
| H | -0.685830000 | -5.161619000  | 1.977682000  |
| H | 0.850357000  | -5.866751000  | -0.316482000 |
| H | -0.341014000 | -6.975590000  | -0.103252000 |
| H | -0.231474000 | -8.804943000  | 3.764389000  |

#### Adduct 7AlaM:

|   |              |               |              |
|---|--------------|---------------|--------------|
| O | -4.307178000 | -10.607855000 | 3.731714000  |
| S | -2.939284000 | -10.357671000 | 3.268192000  |
| C | -1.887438000 | -10.871203000 | 4.600753000  |
| O | -2.482829000 | -9.038449000  | 2.843188000  |
| C | -2.573547000 | -11.541327000 | 1.991024000  |
| N | -0.706603000 | -10.275657000 | 4.786461000  |
| C | -1.363657000 | -11.441714000 | 1.301962000  |
| C | -3.497224000 | -12.541416000 | 1.702784000  |
| C | -0.921682000 | -11.873755000 | 6.350479000  |
| N | -0.130624000 | -10.883615000 | 5.844823000  |
| C | -1.089485000 | -12.372197000 | 0.309847000  |
| H | -0.655110000 | -10.648833000 | 1.537364000  |
| C | -3.201846000 | -13.459246000 | 0.700072000  |
| H | -4.436229000 | -12.579014000 | 2.247199000  |
| C | -1.104541000 | -12.879762000 | 7.318677000  |
| H | 0.767399000  | -10.554394000 | 6.156372000  |
| C | -1.998402000 | -13.391134000 | -0.007811000 |
| H | -0.150890000 | -12.305587000 | -0.235771000 |
| H | -3.918714000 | -14.240598000 | 0.458171000  |
| C | -1.682688000 | -14.378822000 | -1.088498000 |
| H | -2.467986000 | -15.131054000 | -1.192841000 |
| H | -1.565276000 | -13.883521000 | -2.058014000 |
| H | -0.741500000 | -14.901593000 | -0.889987000 |

|   |              |               |              |
|---|--------------|---------------|--------------|
| N | -2.877001000 | -12.860885000 | 6.064258000  |
| C | -2.070602000 | -11.890555000 | 5.558553000  |
| N | -2.286176000 | -13.468722000 | 7.123373000  |
| C | -4.142123000 | -13.346945000 | 5.563732000  |
| H | -0.474031000 | -13.203846000 | 8.132767000  |
| H | -3.992624000 | -14.114407000 | 4.797061000  |
| H | -4.699697000 | -12.512747000 | 5.135244000  |
| H | -4.691444000 | -13.779650000 | 6.398809000  |
| O | 0.189827000  | -7.793873000  | 3.615044000  |
| O | 0.694940000  | -8.996738000  | 1.769600000  |
| N | 1.742187000  | -6.774054000  | 0.581861000  |
| C | 0.801738000  | -6.594135000  | 1.677483000  |
| C | -0.580734000 | -6.065949000  | 1.271268000  |
| C | 0.583892000  | -7.931173000  | 2.350830000  |
| H | 1.230442000  | -5.907599000  | 2.419624000  |
| H | -1.241968000 | -5.955360000  | 2.135641000  |
| H | -0.485531000 | -5.090400000  | 0.783918000  |
| H | -1.058703000 | -6.755972000  | 0.567437000  |
| H | 1.619439000  | -6.024906000  | -0.090284000 |
| H | 1.492474000  | -7.638576000  | 0.108944000  |
| H | -0.112000000 | -8.672945000  | 3.942830000  |

**Adduct 7AlaM<sub>a</sub>:**

|   |              |               |              |
|---|--------------|---------------|--------------|
| O | -4.307178000 | -10.607855000 | 3.731714000  |
| S | -2.939284000 | -10.357671000 | 3.268192000  |
| C | -1.887438000 | -10.871203000 | 4.600753000  |
| O | -2.482829000 | -9.038449000  | 2.843188000  |
| C | -2.573547000 | -11.541327000 | 1.991024000  |
| N | -0.706603000 | -10.275657000 | 4.786461000  |
| C | -1.363657000 | -11.441714000 | 1.301962000  |
| C | -3.497224000 | -12.541416000 | 1.702784000  |
| C | -0.921682000 | -11.873755000 | 6.350479000  |
| N | -0.130624000 | -10.883615000 | 5.844823000  |
| C | -1.089485000 | -12.372197000 | 0.309847000  |
| H | -0.655110000 | -10.648833000 | 1.537364000  |
| C | -3.201846000 | -13.459246000 | 0.700072000  |
| H | -4.436229000 | -12.579014000 | 2.247199000  |
| C | -1.104541000 | -12.879762000 | 7.318677000  |
| H | 0.767399000  | -10.554394000 | 6.156372000  |
| C | -1.998402000 | -13.391134000 | -0.007811000 |
| H | -0.150890000 | -12.305587000 | -0.235771000 |
| H | -3.918714000 | -14.240598000 | 0.458171000  |
| C | -1.682688000 | -14.378822000 | -1.088498000 |
| H | -2.467986000 | -15.131054000 | -1.192841000 |
| H | -1.565276000 | -13.883521000 | -2.058014000 |

|   |              |               |              |
|---|--------------|---------------|--------------|
| H | -0.741500000 | -14.901593000 | -0.889987000 |
| N | -2.877001000 | -12.860885000 | 6.064258000  |
| C | -2.070602000 | -11.890555000 | 5.558553000  |
| N | -2.286176000 | -13.468722000 | 7.123373000  |
| C | -4.142123000 | -13.346945000 | 5.563732000  |
| H | -0.474031000 | -13.203846000 | 8.132767000  |
| H | -3.992624000 | -14.114407000 | 4.797061000  |
| H | -4.699697000 | -12.512747000 | 5.135244000  |
| H | -4.691444000 | -13.779650000 | 6.398809000  |
| O | 0.189827000  | -7.793873000  | 3.615044000  |
| O | 0.694940000  | -8.996738000  | 1.769600000  |
| N | 1.742187000  | -6.774054000  | 0.581861000  |
| C | 0.801738000  | -6.594135000  | 1.677483000  |
| C | -0.580734000 | -6.065949000  | 1.271268000  |
| C | 0.583892000  | -7.931173000  | 2.350830000  |
| H | 1.230442000  | -5.907599000  | 2.419624000  |
| H | -1.241968000 | -5.955360000  | 2.135641000  |
| H | -0.485531000 | -5.090400000  | 0.783918000  |
| H | -1.058703000 | -6.755972000  | 0.567437000  |
| H | 1.619439000  | -6.024906000  | -0.090284000 |
| H | 1.492474000  | -7.638576000  | 0.108944000  |
| H | -0.112000000 | -8.672945000  | 3.942830000  |

**Adduct 7AlaM<sub>p</sub>:**

|   |              |               |              |
|---|--------------|---------------|--------------|
| O | -3.881487000 | -11.298049000 | 3.017722000  |
| S | -2.499245000 | -10.831638000 | 2.874277000  |
| C | -1.769397000 | -11.010451000 | 4.480735000  |
| O | -2.167788000 | -9.493551000  | 2.395977000  |
| C | -1.618939000 | -12.035482000 | 1.904031000  |
| N | -0.805716000 | -10.174377000 | 4.875120000  |
| C | -0.301985000 | -11.769442000 | 1.525595000  |
| C | -2.256329000 | -13.219232000 | 1.545237000  |
| C | -1.144584000 | -11.658483000 | 6.527451000  |
| N | -0.435648000 | -10.569077000 | 6.111658000  |
| C | 0.374974000  | -12.720369000 | 0.775224000  |
| H | 0.177533000  | -10.834770000 | 1.812658000  |
| C | -1.558535000 | -14.154906000 | 0.788584000  |
| H | -3.287125000 | -13.386420000 | 1.843502000  |
| C | -1.397523000 | -12.605206000 | 7.538835000  |
| H | 0.273805000  | -10.041071000 | 6.590967000  |
| C | -0.237572000 | -13.922530000 | 0.394586000  |
| H | 1.401540000  | -12.525838000 | 0.472825000  |
| H | -2.047174000 | -15.080845000 | 0.493998000  |
| C | 0.510920000  | -14.928074000 | -0.424973000 |
| H | -0.068219000 | -15.842268000 | -0.574233000 |

|   |              |               |              |
|---|--------------|---------------|--------------|
| H | 0.759904000  | -14.528036000 | -1.413600000 |
| H | 1.459210000  | -15.203613000 | 0.047230000  |
| N | -2.744372000 | -13.043555000 | 5.892821000  |
| C | -2.018233000 | -11.969477000 | 5.484739000  |
| N | -2.359596000 | -13.436447000 | 7.132876000  |
| C | -3.720309000 | -13.815404000 | 5.158535000  |
| H | -0.960114000 | -12.731674000 | 8.517619000  |
| H | -3.235662000 | -14.593397000 | 4.559316000  |
| H | -4.279373000 | -13.148528000 | 4.500104000  |
| H | -4.390212000 | -14.284888000 | 5.877721000  |
| O | -0.076954000 | -7.674760000  | 3.623793000  |
| O | 1.093909000  | -8.915131000  | 2.141537000  |
| N | 1.973877000  | -6.653481000  | 0.899254000  |
| C | 0.780023000  | -6.564688000  | 1.726109000  |
| C | -0.533982000 | -6.370439000  | 0.957316000  |
| C | 0.645433000  | -7.846380000  | 2.518503000  |
| H | 0.888852000  | -5.736465000  | 2.439140000  |
| H | -1.390846000 | -6.295938000  | 1.632963000  |
| H | -0.489343000 | -5.456357000  | 0.356683000  |
| H | -0.709443000 | -7.216428000  | 0.283879000  |
| H | 1.885795000  | -6.016411000  | 0.115439000  |
| H | 2.005472000  | -7.593662000  | 0.514118000  |

**Adduct 7AlaM<sub>c</sub>:**

|   |              |               |             |
|---|--------------|---------------|-------------|
| O | -4.501431000 | -10.149590000 | 6.458473000 |
| S | -4.790552000 | -9.239511000  | 5.345181000 |
| C | -3.319522000 | -9.225247000  | 4.365749000 |
| O | -5.228070000 | -7.863508000  | 5.554530000 |
| C | -5.984164000 | -10.038274000 | 4.290134000 |
| N | -3.169855000 | -8.302832000  | 3.407815000 |
| C | -6.673808000 | -9.278198000  | 3.346535000 |
| C | -6.201980000 | -11.406690000 | 4.411491000 |
| C | -1.355299000 | -9.634856000  | 3.393521000 |
| N | -1.984818000 | -8.564869000  | 2.825250000 |
| C | -7.592059000 | -9.907038000  | 2.517964000 |
| H | -6.487021000 | -8.210458000  | 3.278994000 |
| C | -7.128494000 | -12.019275000 | 3.574316000 |
| H | -5.660541000 | -11.970428000 | 5.165748000 |
| C | -0.214492000 | -10.462477000 | 3.424951000 |
| H | -1.618646000 | -7.942105000  | 2.119699000 |
| C | -7.834798000 | -11.283681000 | 2.618182000 |
| H | -8.136744000 | -9.322990000  | 1.779377000 |
| H | -7.311062000 | -13.087726000 | 3.664350000 |
| C | -8.843671000 | -11.943113000 | 1.728718000 |

|   |              |               |             |
|---|--------------|---------------|-------------|
| H | -8.787548000 | -13.032455000 | 1.790588000 |
| H | -9.863893000 | -11.651328000 | 2.001488000 |
| H | -8.705636000 | -11.656540000 | 0.681740000 |
| N | -1.573022000 | -11.151955000 | 4.980152000 |
| C | -2.208238000 | -10.099993000 | 4.394975000 |
| N | -0.370206000 | -11.377772000 | 4.384426000 |
| C | -2.043464000 | -12.059376000 | 5.999557000 |
| H | 0.691983000  | -10.436997000 | 2.829413000 |
| H | -2.752342000 | -12.784974000 | 5.586009000 |
| H | -2.541389000 | -11.500086000 | 6.791507000 |
| H | -1.175862000 | -12.590287000 | 6.388736000 |
| O | 0.708838000  | -7.042965000  | 4.213603000 |
| O | 0.495969000  | -7.448673000  | 2.002480000 |
| N | 2.610194000  | -9.145672000  | 2.053961000 |
| C | 2.475020000  | -8.209964000  | 3.158924000 |
| C | 3.549709000  | -7.118541000  | 3.236143000 |
| C | 1.120928000  | -7.550465000  | 3.042188000 |
| H | 2.479344000  | -8.772978000  | 4.101670000 |
| H | 3.398904000  | -6.460003000  | 4.096107000 |
| H | 4.539325000  | -7.574371000  | 3.330439000 |
| H | 3.544661000  | -6.507103000  | 2.327435000 |
| H | 3.575289000  | -9.445960000  | 1.979563000 |
| H | 2.375100000  | -8.663952000  | 1.191269000 |
| H | -0.152634000 | -6.624019000  | 4.064181000 |

**Adduct 7LysB:**

|   |              |               |             |
|---|--------------|---------------|-------------|
| O | -4.399916000 | -10.946267000 | 6.655317000 |
| S | -3.440286000 | -10.114579000 | 5.906725000 |
| C | -2.342564000 | -11.267903000 | 5.101795000 |
| O | -2.613961000 | -9.100642000  | 6.570707000 |
| C | -4.329841000 | -9.314594000  | 4.569496000 |
| N | -1.248380000 | -10.808577000 | 4.485338000 |
| C | -3.750589000 | -8.222391000  | 3.918301000 |
| C | -5.594297000 | -9.781041000  | 4.211767000 |
| C | -1.261593000 | -13.020063000 | 4.224866000 |
| N | -0.599450000 | -11.860302000 | 3.958088000 |
| C | -4.451911000 | -7.603734000  | 2.887964000 |
| H | -2.776547000 | -7.857598000  | 4.225672000 |
| C | -6.282189000 | -9.145342000  | 3.179443000 |
| H | -6.034426000 | -10.612450000 | 4.751033000 |
| C | -1.291553000 | -14.429229000 | 4.095161000 |
| H | 0.272695000  | -11.633831000 | 3.467466000 |
| C | -5.722947000 | -8.055442000  | 2.499202000 |
| H | -4.009945000 | -6.750017000  | 2.381463000 |
| H | -7.272077000 | -9.497587000  | 2.902809000 |

|   |              |               |              |
|---|--------------|---------------|--------------|
| C | -6.459691000 | -7.388739000  | 1.363325000  |
| H | -7.532124000 | -7.596681000  | 1.403959000  |
| H | -6.321074000 | -6.303584000  | 1.380014000  |
| H | -6.090901000 | -7.747203000  | 0.394485000  |
| N | -3.047158000 | -13.848064000 | 5.247224000  |
| C | -2.404159000 | -12.677940000 | 4.962792000  |
| N | -2.374063000 | -14.899707000 | 4.710417000  |
| C | -4.312618000 | -14.077423000 | 5.925217000  |
| H | -0.603624000 | -15.105664000 | 3.610375000  |
| H | -5.132109000 | -14.157682000 | 5.203115000  |
| H | -4.504467000 | -13.243726000 | 6.599620000  |
| H | -4.235615000 | -15.011801000 | 6.482074000  |
| O | 0.186097000  | -9.664278000  | 1.159823000  |
| O | 1.458671000  | -10.327428000 | 2.908268000  |
| N | 3.286701000  | -8.250190000  | 2.464445000  |
| N | 6.176794000  | -8.168775000  | -3.587809000 |
| C | 3.887362000  | -8.077345000  | -0.502897000 |
| C | 2.987523000  | -9.119537000  | 0.169035000  |
| C | 4.630360000  | -8.630811000  | -1.723827000 |
| C | 2.297848000  | -8.587994000  | 1.446857000  |
| C | 5.519987000  | -7.591634000  | -2.408719000 |
| C | 1.267939000  | -9.614687000  | 1.924723000  |
| H | 4.599668000  | -7.698271000  | 0.237838000  |
| H | 3.271826000  | -7.219177000  | -0.808586000 |
| H | 3.581416000  | -10.004045000 | 0.440844000  |
| H | 2.216957000  | -9.460715000  | -0.531462000 |
| H | 3.920380000  | -9.019886000  | -2.464294000 |
| H | 5.251334000  | -9.485109000  | -1.414722000 |
| H | 1.743324000  | -7.680120000  | 1.180483000  |
| H | 6.220584000  | -7.171991000  | -1.663606000 |
| H | 4.897134000  | -6.755355000  | -2.751009000 |
| H | 3.625650000  | -9.117865000  | 2.877925000  |
| H | 2.832713000  | -7.752567000  | 3.227144000  |
| H | 6.841545000  | -8.880609000  | -3.290008000 |
| H | 6.727179000  | -7.455060000  | -4.059989000 |
| H | -0.448305000 | -10.365910000 | 1.488868000  |

**Adduct 7LysB<sub>a</sub>:**

|   |              |               |             |
|---|--------------|---------------|-------------|
| O | -4.356548000 | -10.339574000 | 6.233349000 |
| S | -3.237608000 | -9.782753000  | 5.451482000 |
| C | -2.225092000 | -11.186101000 | 5.014160000 |
| O | -2.356656000 | -8.744555000  | 5.997349000 |
| C | -3.895082000 | -9.186101000  | 3.892689000 |
| N | -1.057239000 | -10.983462000 | 4.394942000 |
| C | -3.141257000 | -8.290491000  | 3.129696000 |

|   |              |               |              |
|---|--------------|---------------|--------------|
| C | -5.154964000 | -9.610801000  | 3.472749000  |
| C | -1.283527000 | -13.183511000 | 4.651472000  |
| N | -0.491684000 | -12.182524000 | 4.176935000  |
| C | -3.662269000 | -7.828597000  | 1.925089000  |
| H | -2.173451000 | -7.952702000  | 3.483768000  |
| C | -5.660542000 | -9.133929000  | 2.264356000  |
| H | -5.731867000 | -10.284915000 | 4.096044000  |
| C | -1.451325000 | -14.575277000 | 4.846440000  |
| H | 0.417595000  | -12.157350000 | 3.702797000  |
| C | -4.924246000 | -8.243897000  | 1.471340000  |
| H | -3.083953000 | -7.127252000  | 1.329757000  |
| H | -6.645844000 | -9.452989000  | 1.936052000  |
| C | -5.464692000 | -7.748740000  | 0.152122000  |
| H | -6.543049000 | -7.909623000  | 0.074444000  |
| H | -5.268285000 | -6.680735000  | 0.016789000  |
| H | -4.990681000 | -8.272982000  | -0.686538000 |
| N | -3.198789000 | -13.587858000 | 5.694243000  |
| C | -2.423728000 | -12.578169000 | 5.200418000  |
| N | -2.608914000 | -14.790833000 | 5.467031000  |
| C | -4.516134000 | -13.541676000 | 6.308062000  |
| H | -0.811380000 | -15.404420000 | 4.584040000  |
| H | -5.295680000 | -13.757916000 | 5.570041000  |
| H | -4.673939000 | -12.546311000 | 6.721102000  |
| H | -4.553249000 | -14.294663000 | 7.096191000  |
| O | 0.704696000  | -9.161552000  | 3.318578000  |
| O | 1.734953000  | -11.130139000 | 2.896089000  |
| N | 3.974812000  | -9.813069000  | 1.838898000  |
| N | 2.734983000  | -5.856181000  | -3.438210000 |
| C | 3.021363000  | -7.629498000  | -0.041263000 |
| C | 2.127248000  | -8.627527000  | 0.701686000  |
| C | 2.461110000  | -7.234651000  | -1.412091000 |
| C | 2.726556000  | -9.088818000  | 2.050555000  |
| C | 3.341031000  | -6.226581000  | -2.153598000 |
| C | 1.676493000  | -9.905255000  | 2.807808000  |
| H | 4.020893000  | -8.064582000  | -0.148182000 |
| H | 3.139914000  | -6.728329000  | 0.577320000  |
| H | 1.962828000  | -9.516961000  | 0.076672000  |
| H | 1.141457000  | -8.185759000  | 0.886315000  |
| H | 1.456050000  | -6.806712000  | -1.309700000 |
| H | 2.349666000  | -8.136585000  | -2.032612000 |
| H | 2.934843000  | -8.196620000  | 2.653129000  |
| H | 4.363352000  | -6.638234000  | -2.240218000 |
| H | 3.426877000  | -5.313325000  | -1.550981000 |
| H | 3.745982000  | -10.745745000 | 1.497599000  |
| H | 4.436610000  | -9.963167000  | 2.733125000  |
| H | 2.734927000  | -6.664483000  | -4.057850000 |

|   |             |              |              |
|---|-------------|--------------|--------------|
| H | 3.307366000 | -5.152736000 | -3.899488000 |
| H | 0.020170000 | -9.736833000 | 3.770418000  |

**Adduct 7LysB<sub>b</sub>:**

|   |              |               |              |
|---|--------------|---------------|--------------|
| O | -5.236389000 | -12.771184000 | 2.657912000  |
| S | -4.299212000 | -11.653733000 | 2.442953000  |
| C | -2.740296000 | -12.211130000 | 3.109740000  |
| O | -4.562474000 | -10.312881000 | 2.976528000  |
| C | -4.016527000 | -11.501184000 | 0.677912000  |
| N | -1.712383000 | -11.357938000 | 3.169946000  |
| C | -3.467430000 | -10.320547000 | 0.171046000  |
| C | -4.365652000 | -12.555699000 | -0.165176000 |
| C | -0.995357000 | -13.298232000 | 3.993638000  |
| N | -0.664468000 | -12.010262000 | 3.700636000  |
| C | -3.259348000 | -10.209924000 | -1.200456000 |
| H | -3.223676000 | -9.501161000  | 0.838381000  |
| C | -4.152037000 | -12.423971000 | -1.536225000 |
| H | -4.816059000 | -13.450722000 | 0.249362000  |
| C | -0.577994000 | -14.540693000 | 4.527687000  |
| H | 0.192437000  | -11.454929000 | 3.798278000  |
| C | -3.592395000 | -11.257141000 | -2.073825000 |
| H | -2.838683000 | -9.292065000  | -1.602041000 |
| H | -4.431187000 | -13.237851000 | -2.199662000 |
| C | -3.336924000 | -11.130620000 | -3.555772000 |
| H | -3.948607000 | -11.831793000 | -4.129545000 |
| H | -3.550846000 | -10.118776000 | -3.912751000 |
| H | -2.286355000 | -11.341178000 | -3.790492000 |
| N | -2.665261000 | -14.756905000 | 3.941208000  |
| C | -2.336552000 | -13.471112000 | 3.620769000  |
| N | -1.594615000 | -15.398406000 | 4.478802000  |
| C | -3.899864000 | -15.490862000 | 3.714746000  |
| H | 0.372930000  | -14.846019000 | 4.938010000  |
| H | -3.834206000 | -16.087500000 | 2.798854000  |
| H | -4.718361000 | -14.777919000 | 3.624922000  |
| H | -4.062416000 | -16.157009000 | 4.562842000  |
| O | -0.775350000 | -8.824110000  | 2.638209000  |
| O | 1.050470000  | -9.835852000  | 3.509004000  |
| N | 2.515051000  | -7.444581000  | 3.395208000  |
| N | 3.197639000  | -4.842523000  | -2.754556000 |
| C | 2.077957000  | -6.176788000  | 0.671107000  |
| C | 1.508758000  | -7.520313000  | 1.137989000  |
| C | 2.395052000  | -6.155127000  | -0.828196000 |
| C | 1.260170000  | -7.576411000  | 2.663215000  |
| C | 2.949347000  | -4.812486000  | -1.308069000 |
| C | 0.501653000  | -8.864054000  | 2.993350000  |

|   |              |              |              |
|---|--------------|--------------|--------------|
| H | 2.977616000  | -5.954036000 | 1.254924000  |
| H | 1.353571000  | -5.382762000 | 0.902531000  |
| H | 2.202874000  | -8.330843000 | 0.873347000  |
| H | 0.566507000  | -7.731347000 | 0.619531000  |
| H | 1.498156000  | -6.388142000 | -1.415699000 |
| H | 3.125694000  | -6.945744000 | -1.056243000 |
| H | 0.605337000  | -6.739246000 | 2.932738000  |
| H | 3.838763000  | -4.554441000 | -0.704297000 |
| H | 2.207265000  | -4.027477000 | -1.114253000 |
| H | 3.010992000  | -8.332983000 | 3.335855000  |
| H | 2.319136000  | -7.314800000 | 4.385277000  |
| H | 3.957232000  | -5.491138000 | -2.953589000 |
| H | 3.522232000  | -3.930466000 | -3.067679000 |
| H | -1.223017000 | -9.699522000 | 2.830436000  |

**Adduct 7LysB<sub>c</sub>:**

|   |              |               |              |
|---|--------------|---------------|--------------|
| O | 1.321145000  | -14.314750000 | 8.082976000  |
| S | 1.695659000  | -13.233502000 | 7.153478000  |
| C | 0.650577000  | -13.457712000 | 5.724046000  |
| O | 3.074325000  | -13.065779000 | 6.681129000  |
| C | 1.164027000  | -11.678299000 | 7.872410000  |
| N | 0.838903000  | -12.686666000 | 4.647792000  |
| C | 1.707292000  | -10.482084000 | 7.397365000  |
| C | 0.228113000  | -11.686082000 | 8.906518000  |
| C | -0.852991000 | -14.055867000 | 4.178422000  |
| N | -0.064225000 | -13.045085000 | 3.719825000  |
| C | 1.291279000  | -9.281575000  | 7.965512000  |
| H | 2.452277000  | -10.495751000 | 6.609331000  |
| C | -0.173042000 | -10.473567000 | 9.464191000  |
| H | -0.157861000 | -12.629075000 | 9.277498000  |
| C | -1.913008000 | -14.953317000 | 3.906312000  |
| H | -0.016040000 | -12.522604000 | 2.838285000  |
| C | 0.344208000  | -9.256124000  | 9.000986000  |
| H | 1.714644000  | -8.348010000  | 7.605132000  |
| H | -0.893941000 | -10.473715000 | 10.277092000 |
| C | -0.116588000 | -7.944516000  | 9.588219000  |
| H | -0.516475000 | -8.075225000  | 10.597298000 |
| H | 0.700802000  | -7.219058000  | 9.635286000  |
| H | -0.910070000 | -7.499713000  | 8.975196000  |
| N | -1.203718000 | -15.381610000 | 5.921451000  |
| C | -0.423650000 | -14.351431000 | 5.480693000  |
| N | -2.106867000 | -15.731845000 | 4.968332000  |
| C | -1.238646000 | -16.040739000 | 7.217010000  |
| H | -2.520924000 | -15.076475000 | 3.022502000  |
| H | -2.023191000 | -15.612277000 | 7.849496000  |

|   |              |               |              |
|---|--------------|---------------|--------------|
| H | -0.271719000 | -15.910665000 | 7.701156000  |
| H | -1.448604000 | -17.098841000 | 7.056596000  |
| O | 2.288668000  | -10.656433000 | 3.475855000  |
| O | 0.790844000  | -11.171648000 | 1.861530000  |
| N | 1.982066000  | -9.368837000  | 0.075617000  |
| N | 2.133075000  | -2.983259000  | 2.113325000  |
| C | 2.515522000  | -6.761174000  | 1.523482000  |
| C | 1.828272000  | -7.992038000  | 2.123541000  |
| C | 1.977990000  | -5.443815000  | 2.093238000  |
| C | 2.309323000  | -9.321011000  | 1.496117000  |
| C | 2.663960000  | -4.209270000  | 1.505216000  |
| C | 1.718912000  | -10.488739000 | 2.290211000  |
| H | 2.391675000  | -6.785089000  | 0.435494000  |
| H | 3.596297000  | -6.827147000  | 1.713900000  |
| H | 0.740770000  | -7.917734000  | 1.979136000  |
| H | 2.000033000  | -8.030672000  | 3.205137000  |
| H | 2.095590000  | -5.418110000  | 3.183767000  |
| H | 0.896786000  | -5.378644000  | 1.898997000  |
| H | 3.398844000  | -9.375428000  | 1.608014000  |
| H | 2.575292000  | -4.240056000  | 0.403698000  |
| H | 3.737455000  | -4.253849000  | 1.729148000  |
| H | 0.984140000  | -9.555411000  | -0.014485000 |
| H | 2.441699000  | -10.169529000 | -0.352228000 |
| H | 1.160816000  | -2.861802000  | 1.835390000  |
| H | 2.629565000  | -2.173927000  | 1.747630000  |
| H | 1.848992000  | -11.404751000 | 3.975914000  |

**Adduct 7LysB6:**

|   |              |               |             |
|---|--------------|---------------|-------------|
| O | -3.995025000 | -9.999890000  | 6.306266000 |
| S | -2.996861000 | -9.606112000  | 5.302612000 |
| C | -2.109906000 | -11.106142000 | 4.906681000 |
| O | -2.009552000 | -8.560827000  | 5.565240000 |
| C | -3.874293000 | -9.171636000  | 3.794326000 |
| N | -0.947667000 | -11.029369000 | 4.255848000 |
| C | -3.241152000 | -8.370201000  | 2.845572000 |
| C | -5.176650000 | -9.624024000  | 3.602063000 |
| C | -1.359665000 | -13.188998000 | 4.604782000 |
| N | -0.496394000 | -12.279976000 | 4.072972000 |
| C | -3.925971000 | -8.034306000  | 1.683401000 |
| H | -2.239581000 | -8.001344000  | 3.028277000 |
| C | -5.846294000 | -9.276378000  | 2.432120000 |
| H | -5.663567000 | -10.215609000 | 4.367121000 |
| C | -1.638698000 | -14.550359000 | 4.865134000 |

|   |              |               |              |
|---|--------------|---------------|--------------|
| H | 0.413898000  | -12.362225000 | 3.612401000  |
| C | -5.232988000 | -8.485023000  | 1.454413000  |
| H | -3.440435000 | -7.403689000  | 0.946105000  |
| H | -6.865145000 | -9.617510000  | 2.282947000  |
| C | -5.952968000 | -8.133651000  | 0.176799000  |
| H | -7.034250000 | -8.236004000  | 0.286340000  |
| H | -5.735636000 | -7.108733000  | -0.132892000 |
| H | -5.638864000 | -8.794084000  | -0.638607000 |
| N | -3.270740000 | -13.381308000 | 5.709363000  |
| C | -2.426597000 | -12.466132000 | 5.152332000  |
| N | -2.791222000 | -14.635374000 | 5.521050000  |
| C | -4.559091000 | -13.190477000 | 6.358487000  |
| H | -1.082501000 | -15.442221000 | 4.626000000  |
| H | -5.375105000 | -13.367268000 | 5.652418000  |
| H | -4.611724000 | -12.170595000 | 6.733988000  |
| H | -4.637403000 | -13.900984000 | 7.180207000  |
| O | 1.087339000  | -9.381090000  | 3.267175000  |
| O | 1.876250000  | -11.450299000 | 2.856131000  |
| N | 4.377721000  | -10.366375000 | 2.079798000  |
| N | 3.961880000  | -6.490443000  | -3.407202000 |
| C | 3.779958000  | -8.164573000  | 0.048191000  |
| C | 2.759457000  | -9.094798000  | 0.710857000  |
| C | 3.392411000  | -7.785156000  | -1.384747000 |
| C | 3.177455000  | -9.540298000  | 2.130979000  |
| C | 4.395895000  | -6.841920000  | -2.048515000 |
| C | 1.987210000  | -10.234002000 | 2.795030000  |
| H | 4.760579000  | -8.648582000  | 0.060396000  |
| H | 3.874115000  | -7.252848000  | 0.652303000  |
| H | 2.621429000  | -9.994353000  | 0.097405000  |
| H | 1.786208000  | -8.597290000  | 0.767187000  |
| H | 2.405912000  | -7.308740000  | -1.401899000 |
| H | 3.306153000  | -8.697169000  | -1.991095000 |
| H | 3.396273000  | -8.644175000  | 2.719307000  |
| H | 5.397510000  | -7.300423000  | -2.014789000 |
| H | 4.455134000  | -5.913521000  | -1.470532000 |
| H | 4.141265000  | -11.293479000 | 1.736730000  |
| H | 4.767559000  | -10.492912000 | 3.008106000  |
| H | 3.972041000  | -7.307125000  | -4.010810000 |
| H | 4.584272000  | -5.805699000  | -3.823151000 |
| H | 0.311330000  | -9.863443000  | 3.663931000  |

**Adduct 7LysB6<sub>a</sub>:**

|   |              |               |             |
|---|--------------|---------------|-------------|
| O | -4.046706000 | -10.118529000 | 6.411755000 |
| S | -3.107778000 | -9.640144000  | 5.388008000 |
| C | -2.179269000 | -11.083454000 | 4.889632000 |

|   |              |               |              |
|---|--------------|---------------|--------------|
| O | -2.152522000 | -8.567223000  | 5.657931000  |
| C | -4.062641000 | -9.176091000  | 3.936792000  |
| N | -1.047437000 | -10.929592000 | 4.200155000  |
| C | -3.500068000 | -8.306941000  | 3.003327000  |
| C | -5.353008000 | -9.672197000  | 3.773966000  |
| C | -1.359203000 | -13.117777000 | 4.463143000  |
| N | -0.554115000 | -12.150645000 | 3.942546000  |
| C | -4.244261000 | -7.945981000  | 1.886130000  |
| H | -2.506824000 | -7.906833000  | 3.164607000  |
| C | -6.082756000 | -9.298747000  | 2.648762000  |
| H | -5.785109000 | -10.317221000 | 4.528700000  |
| C | -1.573321000 | -14.499836000 | 4.670670000  |
| H | 0.338273000  | -12.173757000 | 3.442127000  |
| C | -5.541050000 | -8.438545000  | 1.687021000  |
| H | -3.814351000 | -7.262526000  | 1.161482000  |
| H | -7.092883000 | -9.673649000  | 2.523283000  |
| C | -6.325777000 | -8.057302000  | 0.456947000  |
| H | -7.396715000 | -8.210476000  | 0.602704000  |
| H | -6.162786000 | -7.010390000  | 0.190471000  |
| H | -6.018346000 | -8.663912000  | -0.401665000 |
| N | -3.215828000 | -13.438461000 | 5.629155000  |
| C | -2.431672000 | -12.465107000 | 5.083379000  |
| N | -2.694738000 | -14.661878000 | 5.364932000  |
| C | -4.483972000 | -13.330559000 | 6.334629000  |
| H | -0.992030000 | -15.356287000 | 4.369740000  |
| H | -5.320634000 | -13.490328000 | 5.648880000  |
| H | -4.554392000 | -12.338304000 | 6.775596000  |
| H | -4.508223000 | -14.093237000 | 7.111607000  |
| O | 0.866972000  | -9.149854000  | 3.207499000  |
| O | 1.727469000  | -11.159828000 | 2.666192000  |
| N | 4.137808000  | -9.927027000  | 1.823414000  |
| N | 3.290195000  | -5.766207000  | -3.401561000 |
| C | 3.343289000  | -7.635494000  | -0.043274000 |
| C | 2.403422000  | -8.656907000  | 0.604518000  |
| C | 2.878298000  | -7.203835000  | -1.437794000 |
| C | 2.908005000  | -9.159221000  | 1.976730000  |
| C | 3.795610000  | -6.163331000  | -2.080645000 |
| C | 1.781439000  | -9.938145000  | 2.657432000  |
| H | 4.349164000  | -8.061888000  | -0.093907000 |
| H | 3.410070000  | -6.753188000  | 0.606450000  |
| H | 2.285383000  | -9.526086000  | -0.055009000 |
| H | 1.409215000  | -8.217080000  | 0.730605000  |
| H | 1.864336000  | -6.791083000  | -1.393257000 |
| H | 2.825334000  | -8.084972000  | -2.091718000 |
| H | 3.117805000  | -8.286919000  | 2.603030000  |
| H | 4.824355000  | -6.557801000  | -2.107096000 |

|   |             |               |              |
|---|-------------|---------------|--------------|
| H | 3.818742000 | -5.266229000  | -1.452824000 |
| H | 3.923767000 | -10.843119000 | 1.438619000  |
| H | 4.576409000 | -10.088060000 | 2.724230000  |
| H | 3.329080000 | -6.545986000  | -4.051053000 |
| H | 3.852804000 | -5.020870000  | -3.798074000 |
| H | 0.131276000 | -9.684990000  | 3.613492000  |

**Adduct 7LysB6<sub>b</sub>:**

|   |              |               |              |
|---|--------------|---------------|--------------|
| O | -5.257928000 | -12.487053000 | 2.846643000  |
| S | -4.260097000 | -11.501757000 | 2.408591000  |
| C | -2.694672000 | -12.120440000 | 3.009114000  |
| O | -4.354902000 | -10.090903000 | 2.778728000  |
| C | -4.141237000 | -11.595886000 | 0.617033000  |
| N | -1.629626000 | -11.316762000 | 3.013559000  |
| C | -3.638825000 | -10.504552000 | -0.089502000 |
| C | -4.567951000 | -12.746244000 | -0.041168000 |
| C | -0.965055000 | -13.286171000 | 3.809815000  |
| N | -0.589825000 | -12.016040000 | 3.493859000  |
| C | -3.552796000 | -10.581641000 | -1.475080000 |
| H | -3.342773000 | -9.606359000  | 0.437939000  |
| C | -4.474541000 | -12.804096000 | -1.428671000 |
| H | -4.988261000 | -13.569426000 | 0.522875000  |
| C | -0.581264000 | -14.541058000 | 4.335823000  |
| H | 0.291333000  | -11.502542000 | 3.578913000  |
| C | -3.961343000 | -11.730366000 | -2.165445000 |
| H | -3.170380000 | -9.731559000  | -2.030075000 |
| H | -4.815956000 | -13.693994000 | -1.946568000 |
| C | -3.836464000 | -11.810402000 | -3.666219000 |
| H | -4.526150000 | -12.545348000 | -4.085792000 |
| H | -4.038998000 | -10.844481000 | -4.134459000 |
| H | -2.822209000 | -12.106964000 | -3.954608000 |
| N | -2.701754000 | -14.661612000 | 3.853282000  |
| C | -2.327224000 | -13.397299000 | 3.504039000  |
| N | -1.638689000 | -15.345670000 | 4.343497000  |
| C | -3.983250000 | -15.333948000 | 3.698964000  |
| H | 0.370169000  | -14.890463000 | 4.702760000  |
| H | -4.001514000 | -15.920796000 | 2.776420000  |
| H | -4.770863000 | -14.583788000 | 3.671664000  |
| H | -4.122637000 | -16.000166000 | 4.549001000  |
| O | -0.635805000 | -8.731401000  | 2.619739000  |
| O | 1.175383000  | -9.856792000  | 3.345150000  |
| N | 2.644435000  | -7.437295000  | 3.503564000  |
| N | 3.471139000  | -4.465483000  | -2.479179000 |
| C | 2.249794000  | -6.002829000  | 0.825499000  |
| C | 1.732419000  | -7.392854000  | 1.207454000  |

|   |              |              |              |
|---|--------------|--------------|--------------|
| C | 2.642017000  | -5.902483000 | -0.652207000 |
| C | 1.421461000  | -7.530374000 | 2.715573000  |
| C | 3.126924000  | -4.508808000 | -1.051702000 |
| C | 0.648292000  | -8.831057000 | 2.938475000  |
| H | 3.104383000  | -5.755200000 | 1.461586000  |
| H | 1.470512000  | -5.261725000 | 1.045926000  |
| H | 2.476557000  | -8.154388000 | 0.941490000  |
| H | 0.827523000  | -7.620907000 | 0.635548000  |
| H | 1.794947000  | -6.171412000 | -1.293074000 |
| H | 3.435744000  | -6.630974000 | -0.866848000 |
| H | 0.757796000  | -6.709566000 | 3.003548000  |
| H | 3.959755000  | -4.214483000 | -0.392568000 |
| H | 2.322108000  | -3.785202000 | -0.884001000 |
| H | 3.172516000  | -8.301582000 | 3.418646000  |
| H | 2.430307000  | -7.325751000 | 4.489210000  |
| H | 4.272359000  | -5.058410000 | -2.673824000 |
| H | 3.720931000  | -3.524848000 | -2.765680000 |
| H | -1.102913000 | -9.602931000 | 2.741110000  |

**Adduct 7LysB6c:**

|   |              |               |              |
|---|--------------|---------------|--------------|
| O | 1.671047000  | -14.310559000 | 7.883467000  |
| S | 1.806116000  | -13.084993000 | 7.084702000  |
| C | 0.681591000  | -13.291472000 | 5.711301000  |
| O | 3.094128000  | -12.653621000 | 6.544859000  |
| C | 1.124927000  | -11.724699000 | 8.043246000  |
| N | 0.787583000  | -12.488241000 | 4.651247000  |
| C | 1.484948000  | -10.417476000 | 7.719222000  |
| C | 0.266710000  | -11.993684000 | 9.105702000  |
| C | -0.912261000 | -13.869960000 | 4.256339000  |
| N | -0.170225000 | -12.833672000 | 3.777047000  |
| C | 0.960243000  | -9.369812000  | 8.467075000  |
| H | 2.179846000  | -10.230690000 | 6.910012000  |
| C | -0.246842000 | -10.931154000 | 9.844213000  |
| H | 0.027673000  | -13.017865000 | 9.363182000  |
| C | -1.968266000 | -14.780942000 | 4.024495000  |
| H | -0.176447000 | -12.314543000 | 2.895115000  |
| C | 0.083768000  | -9.607121000  | 9.534570000  |
| H | 1.244060000  | -8.351288000  | 8.224076000  |
| H | -0.906916000 | -11.136414000 | 10.680149000 |
| C | -0.498049000 | -8.458858000  | 10.320263000 |
| H | -0.846348000 | -8.782915000  | 11.302790000 |
| H | 0.235783000  | -7.662170000  | 10.462961000 |
| H | -1.353690000 | -8.023439000  | 9.792953000  |
| N | -1.120160000 | -15.254359000 | 5.973875000  |
| C | -0.393713000 | -14.194663000 | 5.515977000  |

|   |              |               |              |
|---|--------------|---------------|--------------|
| N | -2.073819000 | -15.592511000 | 5.071365000  |
| C | -1.049687000 | -15.956086000 | 7.246749000  |
| H | -2.630408000 | -14.892885000 | 3.181297000  |
| H | -1.773719000 | -15.543567000 | 7.954879000  |
| H | -0.043846000 | -15.852349000 | 7.648641000  |
| H | -1.281161000 | -17.005200000 | 7.069251000  |
| O | 2.295583000  | -10.531881000 | 3.333480000  |
| O | 0.661860000  | -10.987654000 | 1.851570000  |
| N | 1.960975000  | -9.402075000  | -0.105927000 |
| N | 2.402137000  | -2.909965000  | 1.598707000  |
| C | 2.619518000  | -6.728959000  | 1.222007000  |
| C | 1.843146000  | -7.891981000  | 1.846914000  |
| C | 2.120785000  | -5.360059000  | 1.696252000  |
| C | 2.285029000  | -9.272479000  | 1.309508000  |
| C | 2.909169000  | -4.194683000  | 1.098292000  |
| C | 1.659033000  | -10.361697000 | 2.181832000  |
| H | 2.549674000  | -6.800829000  | 0.132943000  |
| H | 3.682445000  | -6.835613000  | 1.474692000  |
| H | 0.770387000  | -7.775048000  | 1.647008000  |
| H | 1.966399000  | -7.877958000  | 2.934294000  |
| H | 2.173073000  | -5.289640000  | 2.788400000  |
| H | 1.061107000  | -5.247706000  | 1.429325000  |
| H | 3.369950000  | -9.352683000  | 1.426802000  |
| H | 2.890110000  | -4.273470000  | -0.000863000 |
| H | 3.958450000  | -4.275995000  | 1.401419000  |
| H | 0.961668000  | -9.550787000  | -0.217188000 |
| H | 2.419684000  | -10.213204000 | -0.507646000 |
| H | 1.455823000  | -2.744040000  | 1.269557000  |
| H | 2.971747000  | -2.138841000  | 1.266764000  |
| H | 1.847666000  | -11.225878000 | 3.890015000  |

**Adduct 7LysC:**

|   |              |               |             |
|---|--------------|---------------|-------------|
| O | -4.245686000 | -10.163230000 | 6.101547000 |
| S | -3.079676000 | -9.721580000  | 5.333114000 |
| C | -2.140844000 | -11.190348000 | 5.022412000 |
| O | -2.164946000 | -8.707966000  | 5.842065000 |
| C | -3.644345000 | -9.196854000  | 3.730811000 |
| N | -0.950162000 | -11.090570000 | 4.443085000 |
| C | -2.803312000 | -8.430925000  | 2.929038000 |
| C | -4.920145000 | -9.546514000  | 3.309998000 |
| C | -1.308540000 | -13.243039000 | 4.808815000 |
| N | -0.446615000 | -12.319091000 | 4.312189000 |
| C | -3.254009000 | -8.024379000  | 1.683421000 |

|   |              |               |              |
|---|--------------|---------------|--------------|
| H | -1.818837000 | -8.147946000  | 3.284613000  |
| C | -5.354812000 | -9.126529000  | 2.060053000  |
| H | -5.563335000 | -10.120750000 | 3.966699000  |
| C | -1.563718000 | -14.608541000 | 5.072241000  |
| H | 0.479047000  | -12.367565000 | 3.874816000  |
| C | -4.530548000 | -8.367729000  | 1.229029000  |
| H | -2.607273000 | -7.421639000  | 1.053138000  |
| H | -6.354702000 | -9.386851000  | 1.726988000  |
| C | -4.995147000 | -7.936875000  | -0.135727000 |
| H | -6.083722000 | -7.965530000  | -0.215060000 |
| H | -4.662088000 | -6.922160000  | -0.366514000 |
| H | -4.589435000 | -8.596351000  | -0.910030000 |
| N | -3.271580000 | -13.483426000 | 5.791129000  |
| C | -2.423770000 | -12.552081000 | 5.276613000  |
| N | -2.745889000 | -14.717982000 | 5.654102000  |
| C | -4.596616000 | -13.325048000 | 6.355702000  |
| H | -0.965338000 | -15.485664000 | 4.879750000  |
| H | -5.363304000 | -13.569697000 | 5.615531000  |
| H | -4.716662000 | -12.291434000 | 6.675227000  |
| H | -4.692478000 | -14.000691000 | 7.205161000  |
| O | 0.905430000  | -9.411742000  | 3.351175000  |
| O | 1.851743000  | -11.434201000 | 3.084255000  |
| N | 4.161354000  | -10.315882000 | 2.016540000  |
| N | 3.347363000  | -6.492951000  | -3.384964000 |
| C | 3.417882000  | -8.147787000  | 0.060790000  |
| C | 2.436182000  | -9.042684000  | 0.810188000  |
| C | 2.920208000  | -7.759883000  | -1.328362000 |
| C | 2.970567000  | -9.502210000  | 2.176812000  |
| C | 3.889241000  | -6.855270000  | -2.078257000 |
| C | 1.856750000  | -10.219828000 | 2.926873000  |
| H | 4.380048000  | -8.664246000  | -0.007822000 |
| H | 3.595232000  | -7.239215000  | 0.651548000  |
| H | 2.215914000  | -9.935493000  | 0.209425000  |
| H | 1.485741000  | -8.520466000  | 0.959347000  |
| H | 1.952346000  | -7.250097000  | -1.263785000 |
| H | 2.749726000  | -8.669940000  | -1.920500000 |
| H | 3.225907000  | -8.610609000  | 2.759942000  |
| H | 4.876302000  | -7.346928000  | -2.123690000 |
| H | 4.031105000  | -5.931056000  | -1.506213000 |
| H | 3.878481000  | -11.238972000 | 1.696161000  |
| H | 4.601914000  | -10.465319000 | 2.919077000  |
| H | 3.289425000  | -7.318621000  | -3.974455000 |
| H | 3.970567000  | -5.846516000  | -3.858319000 |
| H | 0.182370000  | -9.930259000  | 3.808835000  |

**Adduct 7LysC<sub>a</sub>:**

|   |              |               |              |
|---|--------------|---------------|--------------|
| O | -4.333532000 | -10.315096000 | 6.191225000  |
| S | -3.201675000 | -9.778116000  | 5.432455000  |
| C | -2.209325000 | -11.184517000 | 5.016000000  |
| O | -2.320861000 | -8.759255000  | 5.988633000  |
| C | -3.817119000 | -9.180987000  | 3.875039000  |
| N | -1.045436000 | -11.000926000 | 4.403645000  |
| C | -3.024407000 | -8.329741000  | 3.110321000  |
| C | -5.082740000 | -9.561724000  | 3.451721000  |
| C | -1.292390000 | -13.182942000 | 4.673110000  |
| N | -0.491246000 | -12.196532000 | 4.195387000  |
| C | -3.513716000 | -7.868571000  | 1.899225000  |
| H | -2.047393000 | -8.025275000  | 3.468560000  |
| C | -5.556994000 | -9.085716000  | 2.236258000  |
| H | -5.688086000 | -10.204827000 | 4.079958000  |
| C | -1.475925000 | -14.570129000 | 4.875755000  |
| H | 0.416411000  | -12.180617000 | 3.719854000  |
| C | -4.781966000 | -8.240532000  | 1.442823000  |
| H | -2.904729000 | -7.200291000  | 1.297972000  |
| H | -6.549442000 | -9.370947000  | 1.901551000  |
| C | -5.288890000 | -7.741189000  | 0.117020000  |
| H | -6.359555000 | -7.921965000  | 0.004222000  |
| H | -5.110514000 | -6.668757000  | 0.003625000  |
| H | -4.777122000 | -8.243959000  | -0.709914000 |
| N | -3.207089000 | -13.563043000 | 5.705501000  |
| C | -2.420883000 | -12.568776000 | 5.211295000  |
| N | -2.630945000 | -14.763242000 | 5.489559000  |
| C | -4.517286000 | -13.495601000 | 6.320802000  |
| H | -0.845503000 | -15.407723000 | 4.619893000  |
| H | -5.297063000 | -13.744281000 | 5.595860000  |
| H | -4.675390000 | -12.484514000 | 6.691566000  |
| H | -4.550684000 | -14.212544000 | 7.140677000  |
| O | 0.675482000  | -9.187118000  | 3.311940000  |
| O | 1.705192000  | -11.145085000 | 2.908878000  |
| N | 3.897874000  | -9.865937000  | 1.776236000  |
| N | 2.615532000  | -5.841984000  | -3.384781000 |
| C | 2.946250000  | -7.647400000  | -0.030982000 |
| C | 2.052189000  | -8.628483000  | 0.720200000  |
| C | 2.360335000  | -7.225102000  | -1.375050000 |
| C | 2.679577000  | -9.121320000  | 2.034726000  |
| C | 3.238341000  | -6.229834000  | -2.122178000 |
| C | 1.642613000  | -9.926548000  | 2.805754000  |
| H | 3.930126000  | -8.105612000  | -0.169953000 |
| H | 3.103668000  | -6.758085000  | 0.593761000  |
| H | 1.847641000  | -9.502798000  | 0.087618000  |
| H | 1.084968000  | -8.165934000  | 0.941201000  |

|   |             |               |              |
|---|-------------|---------------|--------------|
| H | 1.368911000 | -6.777909000  | -1.241123000 |
| H | 2.214256000 | -8.114938000  | -2.003295000 |
| H | 2.922203000 | -8.244790000  | 2.645545000  |
| H | 4.249419000 | -6.657787000  | -2.234675000 |
| H | 3.352098000 | -5.325762000  | -1.512906000 |
| H | 3.643106000 | -10.788462000 | 1.431619000  |
| H | 4.394669000 | -10.029220000 | 2.646589000  |
| H | 2.579079000 | -6.641911000  | -4.010375000 |
| H | 3.176684000 | -5.137696000  | -3.853207000 |
| H | 0.001388000 | -9.761995000  | 3.777274000  |

**Adduct 7LysC<sub>b</sub>:**

|   |              |               |              |
|---|--------------|---------------|--------------|
| O | -5.203155000 | -12.748705000 | 2.624762000  |
| S | -4.266728000 | -11.637581000 | 2.441488000  |
| C | -2.731026000 | -12.204586000 | 3.116930000  |
| O | -4.532563000 | -10.313453000 | 2.988538000  |
| C | -3.957774000 | -11.460374000 | 0.699565000  |
| N | -1.703241000 | -11.366781000 | 3.187574000  |
| C | -3.374597000 | -10.288544000 | 0.226339000  |
| C | -4.315668000 | -12.487015000 | -0.163424000 |
| C | -1.012852000 | -13.300980000 | 4.010281000  |
| N | -0.669841000 | -12.019341000 | 3.722555000  |
| C | -3.140371000 | -10.159684000 | -1.133165000 |
| H | -3.123451000 | -9.487582000  | 0.912603000  |
| C | -4.076256000 | -12.337262000 | -1.522955000 |
| H | -4.792756000 | -13.377215000 | 0.229835000  |
| C | -0.610321000 | -14.546835000 | 4.543973000  |
| H | 0.189606000  | -11.470121000 | 3.822367000  |
| C | -3.482505000 | -11.179678000 | -2.025816000 |
| H | -2.690659000 | -9.247099000  | -1.512361000 |
| H | -4.361801000 | -13.131037000 | -2.206183000 |
| C | -3.200746000 | -11.031066000 | -3.496362000 |
| H | -3.786538000 | -11.736438000 | -4.089050000 |
| H | -3.428842000 | -10.020542000 | -3.844161000 |
| H | -2.143016000 | -11.216952000 | -3.709821000 |
| N | -2.683202000 | -14.743703000 | 3.940587000  |
| C | -2.342733000 | -13.463870000 | 3.629186000  |
| N | -1.629112000 | -15.387314000 | 4.482596000  |
| C | -3.921151000 | -15.460421000 | 3.709260000  |
| H | 0.334258000  | -14.861454000 | 4.960187000  |
| H | -3.843757000 | -16.085721000 | 2.815676000  |
| H | -4.722698000 | -14.735998000 | 3.576914000  |
| H | -4.118534000 | -16.094956000 | 4.572773000  |
| O | -0.782327000 | -8.863582000  | 2.616232000  |
| O | 1.024953000  | -9.858856000  | 3.510625000  |

|   |              |              |              |
|---|--------------|--------------|--------------|
| N | 2.516025000  | -7.518293000 | 3.329526000  |
| N | 3.080407000  | -4.888701000 | -2.776142000 |
| C | 2.027096000  | -6.229016000 | 0.646216000  |
| C | 1.450356000  | -7.561578000 | 1.112585000  |
| C | 2.304623000  | -6.199580000 | -0.853839000 |
| C | 1.246113000  | -7.624206000 | 2.635317000  |
| C | 2.863380000  | -4.865980000 | -1.332226000 |
| C | 0.485081000  | -8.897543000 | 2.977900000  |
| H | 2.943804000  | -6.027779000 | 1.208783000  |
| H | 1.323225000  | -5.426113000 | 0.902819000  |
| H | 2.124180000  | -8.379040000 | 0.822516000  |
| H | 0.492115000  | -7.752680000 | 0.618936000  |
| H | 1.390934000  | -6.413268000 | -1.419898000 |
| H | 3.016941000  | -6.997249000 | -1.107168000 |
| H | 0.609709000  | -6.782141000 | 2.928623000  |
| H | 3.768078000  | -4.625493000 | -0.747554000 |
| H | 2.136343000  | -4.075010000 | -1.114797000 |
| H | 2.998885000  | -8.410292000 | 3.252472000  |
| H | 2.356741000  | -7.380810000 | 4.322870000  |
| H | 3.817825000  | -5.550142000 | -3.002628000 |
| H | 3.400884000  | -3.981285000 | -3.098991000 |
| H | -1.230440000 | -9.733599000 | 2.825498000  |

**Adduct 7LysC<sub>c</sub>:**

|   |              |               |              |
|---|--------------|---------------|--------------|
| O | 1.237402000  | -14.234483000 | 8.109373000  |
| S | 1.636800000  | -13.191372000 | 7.161984000  |
| C | 0.624332000  | -13.446398000 | 5.731683000  |
| O | 3.015905000  | -13.051627000 | 6.712714000  |
| C | 1.110578000  | -11.624078000 | 7.816131000  |
| N | 0.832155000  | -12.708379000 | 4.647491000  |
| C | 1.644987000  | -10.451648000 | 7.290202000  |
| C | 0.184906000  | -11.593951000 | 8.850247000  |
| C | -0.845882000 | -14.073579000 | 4.183402000  |
| N | -0.047407000 | -13.080184000 | 3.715782000  |
| C | 1.228932000  | -9.235617000  | 7.808115000  |
| H | 2.384657000  | -10.495639000 | 6.498629000  |
| C | -0.216336000 | -10.365765000 | 9.358405000  |
| H | -0.194368000 | -12.523552000 | 9.258584000  |
| C | -1.904544000 | -14.971660000 | 3.915584000  |
| H | 0.016489000  | -12.573071000 | 2.827480000  |
| C | 0.292238000  | -9.173165000  | 8.843804000  |
| H | 1.644131000  | -8.315751000  | 7.407780000  |
| H | -0.932224000 | -10.333414000 | 10.173822000 |
| C | -0.165401000 | -7.843306000  | 9.378661000  |
| H | -0.606456000 | -7.942407000  | 10.372518000 |

|   |              |               |              |
|---|--------------|---------------|--------------|
| H | 0.663409000  | -7.134081000  | 9.441517000  |
| H | -0.922856000 | -7.401113000  | 8.723086000  |
| N | -1.235981000 | -15.349640000 | 5.942870000  |
| C | -0.445288000 | -14.339052000 | 5.490771000  |
| N | -2.115765000 | -15.715321000 | 4.988178000  |
| C | -1.289762000 | -15.977321000 | 7.247761000  |
| H | -2.498613000 | -15.113298000 | 3.025938000  |
| H | -2.101925000 | -15.555440000 | 7.846039000  |
| H | -0.341049000 | -15.809086000 | 7.754180000  |
| H | -1.465232000 | -17.043731000 | 7.109433000  |
| O | 2.286801000  | -10.688259000 | 3.527420000  |
| O | 0.848146000  | -11.229031000 | 1.886013000  |
| N | 2.002963000  | -9.401268000  | 0.140717000  |
| N | 2.209687000  | -3.067615000  | 2.203675000  |
| C | 2.565830000  | -6.825661000  | 1.597514000  |
| C | 1.876691000  | -8.049405000  | 2.192246000  |
| C | 2.041416000  | -5.514498000  | 2.175382000  |
| C | 2.341756000  | -9.367396000  | 1.551218000  |
| C | 2.733175000  | -4.287707000  | 1.595555000  |
| C | 1.751304000  | -10.533210000 | 2.332623000  |
| H | 2.435484000  | -6.843826000  | 0.511304000  |
| H | 3.645961000  | -6.899301000  | 1.781340000  |
| H | 0.790014000  | -7.965305000  | 2.055557000  |
| H | 2.055863000  | -8.098110000  | 3.270990000  |
| H | 2.162288000  | -5.496194000  | 3.264362000  |
| H | 0.961679000  | -5.439658000  | 1.984415000  |
| H | 3.430429000  | -9.431404000  | 1.656079000  |
| H | 2.645062000  | -4.312907000  | 0.495688000  |
| H | 3.804625000  | -4.341539000  | 1.820507000  |
| H | 1.005788000  | -9.582688000  | 0.054127000  |
| H | 2.461600000  | -10.189334000 | -0.306054000 |
| H | 1.237717000  | -2.939804000  | 1.936248000  |
| H | 2.711267000  | -2.256696000  | 1.855581000  |
| H | 1.844903000  | -11.442389000 | 4.014506000  |

**Adduct 7LysP:**

|   |              |               |             |
|---|--------------|---------------|-------------|
| O | -4.231130000 | -10.149706000 | 6.120366000 |
| S | -3.082020000 | -9.706423000  | 5.326437000 |
| C | -2.138174000 | -11.169095000 | 5.008607000 |
| O | -2.163337000 | -8.679703000  | 5.804448000 |
| C | -3.679420000 | -9.204009000  | 3.729499000 |
| N | -0.940990000 | -11.060454000 | 4.435140000 |
| C | -2.869712000 | -8.409575000  | 2.919195000 |

|   |              |               |              |
|---|--------------|---------------|--------------|
| C | -4.947297000 | -9.599396000  | 3.318293000  |
| C | -1.295258000 | -13.218401000 | 4.770815000  |
| N | -0.437126000 | -12.284072000 | 4.293146000  |
| C | -3.343927000 | -8.020201000  | 1.675047000  |
| H | -1.893056000 | -8.092063000  | 3.270729000  |
| C | -5.405480000 | -9.196139000  | 2.068960000  |
| H | -5.566056000 | -10.194524000 | 3.982040000  |
| C | -1.548150000 | -14.585137000 | 5.017624000  |
| H | 0.493243000  | -12.322428000 | 3.860377000  |
| C | -4.613506000 | -8.408955000  | 1.229040000  |
| H | -2.722041000 | -7.395781000  | 1.038795000  |
| H | -6.398860000 | -9.492340000  | 1.742852000  |
| C | -5.102631000 | -7.989531000  | -0.127373000 |
| H | -6.168006000 | -8.197247000  | -0.252139000 |
| H | -4.942193000 | -6.919813000  | -0.293234000 |
| H | -4.563674000 | -8.523165000  | -0.918446000 |
| N | -3.262420000 | -13.475674000 | 5.739969000  |
| C | -2.419600000 | -12.534173000 | 5.242346000  |
| N | -2.736333000 | -14.705506000 | 5.593185000  |
| C | -4.587494000 | -13.325852000 | 6.295382000  |
| H | -0.947094000 | -15.460282000 | 4.820375000  |
| H | -5.349982000 | -13.558886000 | 5.545438000  |
| H | -4.709167000 | -12.295989000 | 6.630759000  |
| H | -4.690332000 | -14.014951000 | 7.134458000  |
| O | 0.918428000  | -9.390297000  | 3.369075000  |
| O | 1.866663000  | -11.414756000 | 3.094740000  |
| N | 4.183959000  | -10.280594000 | 2.057864000  |
| N | 3.421278000  | -6.516524000  | -3.368223000 |
| C | 3.451369000  | -8.137627000  | 0.088641000  |
| C | 2.462877000  | -9.024837000  | 0.834656000  |
| C | 2.971369000  | -7.765176000  | -1.308883000 |
| C | 2.987866000  | -9.477235000  | 2.206874000  |
| C | 3.950907000  | -6.873405000  | -2.058338000 |
| C | 1.868935000  | -10.197336000 | 2.946510000  |
| H | 4.416018000  | -8.655283000  | 0.038961000  |
| H | 3.621584000  | -7.222095000  | 0.673048000  |
| H | 2.245303000  | -9.922098000  | 0.237076000  |
| H | 1.510382000  | -8.500765000  | 0.974196000  |
| H | 2.003127000  | -7.251089000  | -1.262522000 |
| H | 2.803795000  | -8.682990000  | -1.892275000 |
| H | 3.231900000  | -8.579436000  | 2.788651000  |
| H | 4.937181000  | -7.372321000  | -2.087684000 |
| H | 4.094077000  | -5.945514000  | -1.489742000 |
| H | 3.905043000  | -11.203993000 | 1.734976000  |
| H | 4.606247000  | -10.433035000 | 2.968278000  |
| H | 3.367711000  | -7.347661000  | -3.949867000 |

|   |             |              |              |
|---|-------------|--------------|--------------|
| H | 4.059497000 | -5.884344000 | -3.840134000 |
| H | 0.189017000 | -9.911280000 | 3.816549000  |

**Adduct 7LysP<sub>a</sub>:**

|   |              |               |              |
|---|--------------|---------------|--------------|
| O | -4.305955000 | -10.290877000 | 6.219844000  |
| S | -3.185330000 | -9.757090000  | 5.440983000  |
| C | -2.197819000 | -11.163128000 | 5.015800000  |
| O | -2.295386000 | -8.731448000  | 5.972686000  |
| C | -3.823584000 | -9.174713000  | 3.887894000  |
| N | -1.027047000 | -10.977759000 | 4.408526000  |
| C | -3.056248000 | -8.298012000  | 3.122975000  |
| C | -5.081075000 | -9.591931000  | 3.465742000  |
| C | -1.284742000 | -13.162147000 | 4.645215000  |
| N | -0.481080000 | -12.171150000 | 4.187503000  |
| C | -3.562082000 | -7.847228000  | 1.912152000  |
| H | -2.088166000 | -7.965501000  | 3.484088000  |
| C | -5.571462000 | -9.126093000  | 2.251157000  |
| H | -5.667238000 | -10.252906000 | 4.095936000  |
| C | -1.475590000 | -14.548677000 | 4.829429000  |
| H | 0.428643000  | -12.150676000 | 3.712338000  |
| C | -4.821422000 | -8.255590000  | 1.455658000  |
| H | -2.973521000 | -7.158356000  | 1.311808000  |
| H | -6.557574000 | -9.438297000  | 1.917865000  |
| C | -5.343947000 | -7.773048000  | 0.133142000  |
| H | -6.420132000 | -7.938966000  | 0.041936000  |
| H | -5.149712000 | -6.705428000  | -0.005459000 |
| H | -4.855365000 | -8.300864000  | -0.694036000 |
| N | -3.204763000 | -13.547192000 | 5.665379000  |
| C | -2.417273000 | -12.548458000 | 5.189130000  |
| N | -2.637108000 | -14.745669000 | 5.437468000  |
| C | -4.514183000 | -13.480228000 | 6.271911000  |
| H | -0.848675000 | -15.387829000 | 4.567015000  |
| H | -5.293428000 | -13.700245000 | 5.535401000  |
| H | -4.662835000 | -12.476403000 | 6.669416000  |
| H | -4.561406000 | -14.219122000 | 7.072688000  |
| O | 0.699460000  | -9.180683000  | 3.334059000  |
| O | 1.718114000  | -11.144332000 | 2.912098000  |
| N | 3.910688000  | -9.859430000  | 1.782137000  |
| N | 2.631941000  | -5.866220000  | -3.380132000 |
| C | 2.956116000  | -7.652325000  | -0.020964000 |
| C | 2.061387000  | -8.626596000  | 0.734665000  |
| C | 2.374452000  | -7.239830000  | -1.367851000 |
| C | 2.693965000  | -9.119443000  | 2.046295000  |
| C | 3.254276000  | -6.251624000  | -2.119990000 |
| C | 1.657129000  | -9.923046000  | 2.818926000  |

|   |             |               |              |
|---|-------------|---------------|--------------|
| H | 3.941591000 | -8.113227000  | -0.153177000 |
| H | 3.113241000 | -6.757898000  | 0.598764000  |
| H | 1.849697000 | -9.502368000  | 0.104132000  |
| H | 1.095470000 | -8.159931000  | 0.959696000  |
| H | 1.381597000 | -6.790396000  | -1.240621000 |
| H | 2.228440000 | -8.135560000  | -1.990016000 |
| H | 2.937071000 | -8.239663000  | 2.655486000  |
| H | 4.266298000 | -6.683992000  | -2.226659000 |
| H | 3.371127000 | -5.345187000  | -1.512150000 |
| H | 3.650884000 | -10.781053000 | 1.438991000  |
| H | 4.401750000 | -10.028545000 | 2.654277000  |
| H | 2.597868000 | -6.669836000  | -4.000606000 |
| H | 3.202782000 | -5.171959000  | -3.851111000 |
| H | 0.020263000 | -9.755877000  | 3.794577000  |

**Adduct 7LysP<sub>b</sub>:**

|   |              |               |              |
|---|--------------|---------------|--------------|
| O | -5.220581000 | -12.674103000 | 2.681780000  |
| S | -4.265299000 | -11.587239000 | 2.450873000  |
| C | -2.727301000 | -12.164000000 | 3.109577000  |
| O | -4.489846000 | -10.240352000 | 2.962732000  |
| C | -3.984151000 | -11.467648000 | 0.699847000  |
| N | -1.696639000 | -11.323986000 | 3.186525000  |
| C | -3.402215000 | -10.312950000 | 0.179944000  |
| C | -4.361863000 | -12.521289000 | -0.125562000 |
| C | -0.992109000 | -13.271712000 | 3.963821000  |
| N | -0.660470000 | -11.984681000 | 3.697320000  |
| C | -3.189773000 | -10.228173000 | -1.188807000 |
| H | -3.138255000 | -9.491645000  | 0.838721000  |
| C | -4.143880000 | -12.415380000 | -1.494324000 |
| H | -4.838998000 | -13.395808000 | 0.304761000  |
| C | -0.583720000 | -14.524738000 | 4.469841000  |
| H | 0.199052000  | -11.432309000 | 3.797880000  |
| C | -3.551268000 | -11.275532000 | -2.044950000 |
| H | -2.742657000 | -9.328797000  | -1.604151000 |
| H | -4.445705000 | -13.229247000 | -2.148204000 |
| C | -3.291888000 | -11.177059000 | -3.520709000 |
| H | -3.919133000 | -11.871184000 | -4.085536000 |
| H | -3.480238000 | -10.165613000 | -3.891757000 |
| H | -2.246467000 | -11.416581000 | -3.747746000 |
| N | -2.660118000 | -14.716251000 | 3.883804000  |
| C | -2.330205000 | -13.431885000 | 3.591229000  |
| N | -1.603787000 | -15.368884000 | 4.402352000  |
| C | -3.895482000 | -15.427023000 | 3.648425000  |
| H | 0.364669000  | -14.847310000 | 4.873017000  |
| H | -3.831274000 | -16.022227000 | 2.732027000  |

|   |              |               |              |
|---|--------------|---------------|--------------|
| H | -4.702544000 | -14.700544000 | 3.554520000  |
| H | -4.076903000 | -16.091928000 | 4.493610000  |
| O | -0.772079000 | -8.827978000  | 2.654713000  |
| O | 1.042951000  | -9.845110000  | 3.517220000  |
| N | 2.531632000  | -7.498800000  | 3.354537000  |
| N | 3.122927000  | -4.867673000  | -2.728462000 |
| C | 2.047230000  | -6.208038000  | 0.681489000  |
| C | 1.463485000  | -7.537340000  | 1.142564000  |
| C | 2.336184000  | -6.178489000  | -0.814513000 |
| C | 1.261889000  | -7.602949000  | 2.665161000  |
| C | 2.903666000  | -4.848011000  | -1.287840000 |
| C | 0.497238000  | -8.875576000  | 3.001292000  |
| H | 2.961042000  | -6.010412000  | 1.253346000  |
| H | 1.343545000  | -5.402046000  | 0.934221000  |
| H | 2.132818000  | -8.359055000  | 0.849099000  |
| H | 0.502453000  | -7.722618000  | 0.648942000  |
| H | 1.425551000  | -6.388528000  | -1.389576000 |
| H | 3.047453000  | -6.980453000  | -1.062894000 |
| H | 0.626043000  | -6.758431000  | 2.959144000  |
| H | 3.806560000  | -4.612876000  | -0.694444000 |
| H | 2.178301000  | -4.053803000  | -1.069179000 |
| H | 3.009265000  | -8.393029000  | 3.271332000  |
| H | 2.369352000  | -7.374536000  | 4.348841000  |
| H | 3.860635000  | -5.530197000  | -2.949365000 |
| H | 3.456476000  | -3.961743000  | -3.041083000 |
| H | -1.222670000 | -9.700772000  | 2.852963000  |

**Adduct 7LysP<sub>c</sub>:**

|   |              |               |             |
|---|--------------|---------------|-------------|
| O | 1.337088000  | -14.246627000 | 8.073480000 |
| S | 1.683611000  | -13.165767000 | 7.146738000 |
| C | 0.654689000  | -13.414676000 | 5.728711000 |
| O | 3.048413000  | -12.960790000 | 6.675657000 |
| C | 1.111800000  | -11.636750000 | 7.849837000 |
| N | 0.848100000  | -12.667831000 | 4.643017000 |
| C | 1.621041000  | -10.432563000 | 7.367962000 |
| C | 0.174536000  | -11.665545000 | 8.877236000 |
| C | -0.841878000 | -14.023115000 | 4.193474000 |
| N | -0.045483000 | -13.030824000 | 3.725919000 |
| C | 1.168152000  | -9.243808000  | 7.923101000 |
| H | 2.371362000  | -10.433699000 | 6.583579000 |
| C | -0.263621000 | -10.464445000 | 9.422183000 |
| H | -0.182371000 | -12.619297000 | 9.252312000 |
| C | -1.904252000 | -14.916327000 | 3.935836000 |
| H | 0.011437000  | -12.517821000 | 2.838406000 |
| C | 0.218323000  | -9.239482000  | 8.951559000 |

|   |              |               |              |
|---|--------------|---------------|--------------|
| H | 1.564641000  | -8.299917000  | 7.558242000  |
| H | -0.987527000 | -10.477900000 | 10.232642000 |
| C | -0.281522000 | -7.943939000  | 9.523016000  |
| H | -0.685708000 | -8.078845000  | 10.529452000 |
| H | 0.514335000  | -7.195490000  | 9.570568000  |
| H | -1.081739000 | -7.528388000  | 8.899366000  |
| N | -1.208609000 | -15.311365000 | 5.948804000  |
| C | -0.422067000 | -14.300294000 | 5.497900000  |
| N | -2.102472000 | -15.669463000 | 5.008768000  |
| C | -1.244586000 | -15.943143000 | 7.247369000  |
| H | -2.512228000 | -15.053426000 | 3.054022000  |
| H | -2.031157000 | -15.505100000 | 7.870003000  |
| H | -0.278059000 | -15.802204000 | 7.731014000  |
| H | -1.450543000 | -17.004740000 | 7.106759000  |
| O | 2.292404000  | -10.673044000 | 3.495001000  |
| O | 0.816331000  | -11.201091000 | 1.878136000  |
| N | 1.971696000  | -9.394018000  | 0.111149000  |
| N | 2.274864000  | -3.064235000  | 2.100441000  |
| C | 2.587383000  | -6.828169000  | 1.539962000  |
| C | 1.895652000  | -8.036952000  | 2.157374000  |
| C | 2.081429000  | -5.506355000  | 2.105003000  |
| C | 2.330505000  | -9.363530000  | 1.513995000  |
| C | 2.775057000  | -4.294247000  | 1.499912000  |
| C | 1.737286000  | -10.516964000 | 2.311366000  |
| H | 2.444507000  | -6.861219000  | 0.453913000  |
| H | 3.670193000  | -6.909231000  | 1.712014000  |
| H | 0.806127000  | -7.939621000  | 2.042595000  |
| H | 2.095854000  | -8.082093000  | 3.233932000  |
| H | 2.215120000  | -5.472645000  | 3.193529000  |
| H | 0.998630000  | -5.426008000  | 1.926296000  |
| H | 3.421558000  | -9.440762000  | 1.603824000  |
| H | 2.672868000  | -4.336748000  | 0.399752000  |
| H | 3.850460000  | -4.357810000  | 1.710181000  |
| H | 0.969422000  | -9.554412000  | 0.044901000  |
| H | 2.399991000  | -10.200980000 | -0.331347000 |
| H | 1.302080000  | -2.931620000  | 1.839607000  |
| H | 2.777190000  | -2.265919000  | 1.726215000  |
| H | 1.847969000  | -11.419083000 | 3.994491000  |

**Adduct 7LysM:**

|   |              |               |             |
|---|--------------|---------------|-------------|
| O | -4.224039000 | -10.153262000 | 6.152095000 |
| S | -3.074870000 | -9.701750000  | 5.363182000 |
| C | -2.138173000 | -11.163698000 | 5.029160000 |

|   |              |               |              |
|---|--------------|---------------|--------------|
| O | -2.149412000 | -8.674691000  | 5.830427000  |
| C | -3.663307000 | -9.212500000  | 3.756068000  |
| N | -0.930220000 | -11.053849000 | 4.464548000  |
| C | -2.867749000 | -8.384612000  | 2.964167000  |
| C | -4.894627000 | -9.676154000  | 3.303579000  |
| C | -1.332444000 | -13.227752000 | 4.749753000  |
| N | -0.447766000 | -12.297575000 | 4.299779000  |
| C | -3.320939000 | -8.022537000  | 1.704202000  |
| H | -1.916691000 | -8.023677000  | 3.345040000  |
| C | -5.332865000 | -9.300690000  | 2.038563000  |
| H | -5.501374000 | -10.306550000 | 3.947363000  |
| C | -1.619796000 | -14.591127000 | 4.959343000  |
| H | 0.483741000  | -12.348046000 | 3.880865000  |
| C | -4.556602000 | -8.474035000  | 1.220848000  |
| H | -2.709365000 | -7.374434000  | 1.080637000  |
| H | -6.296538000 | -9.652127000  | 1.677176000  |
| C | -5.033273000 | -8.064730000  | -0.138287000 |
| H | -5.945849000 | -8.593102000  | -0.423872000 |
| H | -5.246476000 | -6.991072000  | -0.177840000 |
| H | -4.276330000 | -8.261034000  | -0.904126000 |
| N | -3.321006000 | -13.454705000 | 5.692677000  |
| C | -2.445319000 | -12.525289000 | 5.224484000  |
| N | -2.823783000 | -14.707619000 | 5.519955000  |
| C | -4.652814000 | -13.277345000 | 6.223093000  |
| H | -1.039181000 | -15.476789000 | 4.749507000  |
| H | -5.376543000 | -13.097325000 | 5.421243000  |
| H | -4.667677000 | -12.424080000 | 6.901145000  |
| H | -4.919940000 | -14.192553000 | 6.749158000  |
| O | 0.961369000  | -9.312245000  | 3.430670000  |
| O | 1.889113000  | -11.355174000 | 3.134042000  |
| N | 4.217244000  | -10.216250000 | 2.090190000  |
| N | 3.357477000  | -6.538936000  | -3.376297000 |
| C | 3.459684000  | -8.134713000  | 0.086730000  |
| C | 2.477422000  | -8.991092000  | 0.868402000  |
| C | 2.943861000  | -7.757222000  | -1.292307000 |
| C | 3.012374000  | -9.417590000  | 2.242344000  |
| C | 3.919016000  | -6.899126000  | -2.078443000 |
| C | 1.902588000  | -10.135657000 | 2.993426000  |
| H | 4.412440000  | -8.672136000  | 0.008194000  |
| H | 3.677695000  | -7.221964000  | 0.660891000  |
| H | 2.237871000  | -9.899129000  | 0.293516000  |
| H | 1.529397000  | -8.456508000  | 1.005964000  |
| H | 1.988539000  | -7.221151000  | -1.216064000 |
| H | 2.726216000  | -8.672758000  | -1.864188000 |
| H | 3.260043000  | -8.508372000  | 2.806175000  |
| H | 4.893952000  | -7.422359000  | -2.127901000 |

|   |             |               |              |
|---|-------------|---------------|--------------|
| H | 4.107576000 | -5.970305000  | -1.523414000 |
| H | 3.927615000 | -11.142570000 | 1.784456000  |
| H | 4.626390000 | -10.369532000 | 3.006264000  |
| H | 3.277075000 | -7.378651000  | -3.942118000 |
| H | 4.010750000 | -5.942216000  | -3.872305000 |
| H | 0.238826000 | -9.838802000  | 3.872393000  |

**Adduct 7LysM<sub>a</sub>:**

|   |              |               |              |
|---|--------------|---------------|--------------|
| O | -4.263863000 | -10.209166000 | 6.247961000  |
| S | -3.131888000 | -9.713793000  | 5.460978000  |
| C | -2.176518000 | -11.147815000 | 5.061194000  |
| O | -2.215055000 | -8.689495000  | 5.950887000  |
| C | -3.745367000 | -9.181777000  | 3.877113000  |
| N | -0.988630000 | -10.992323000 | 4.466547000  |
| C | -2.965032000 | -8.326900000  | 3.098873000  |
| C | -4.980320000 | -9.639418000  | 3.428402000  |
| C | -1.340265000 | -13.183069000 | 4.676669000  |
| N | -0.486115000 | -12.217885000 | 4.240252000  |
| C | -3.437234000 | -7.931689000  | 1.855823000  |
| H | -2.011954000 | -7.969111000  | 3.477477000  |
| C | -5.438419000 | -9.229075000  | 2.181437000  |
| H | -5.575027000 | -10.290086000 | 4.063308000  |
| C | -1.595958000 | -14.559033000 | 4.840974000  |
| H | 0.420592000  | -12.231901000 | 3.769122000  |
| C | -4.676516000 | -8.376948000  | 1.376201000  |
| H | -2.838566000 | -7.260435000  | 1.244169000  |
| H | -6.407211000 | -9.571617000  | 1.825185000  |
| C | -5.165209000 | -7.948740000  | 0.027272000  |
| H | -6.201862000 | -8.248804000  | -0.142414000 |
| H | -5.103499000 | -6.863246000  | -0.096012000 |
| H | -4.559412000 | -8.389011000  | -0.772339000 |
| N | -3.295921000 | -13.485708000 | 5.666375000  |
| C | -2.451542000 | -12.521833000 | 5.210660000  |
| N | -2.781124000 | -14.720725000 | 5.430305000  |
| C | -4.613438000 | -13.354299000 | 6.243470000  |
| H | -1.006104000 | -15.424500000 | 4.579829000  |
| H | -5.363997000 | -13.151616000 | 5.472493000  |
| H | -4.621270000 | -12.532094000 | 6.959137000  |
| H | -4.849532000 | -14.296148000 | 6.736435000  |
| O | 0.770400000  | -9.141117000  | 3.415566000  |
| O | 1.723204000  | -11.136531000 | 2.936114000  |
| N | 3.903542000  | -9.885385000  | 1.721252000  |
| N | 2.470489000  | -5.767758000  | -3.300810000 |
| C | 2.922541000  | -7.640018000  | -0.008025000 |
| C | 2.040104000  | -8.594741000  | 0.778551000  |

|   |             |               |              |
|---|-------------|---------------|--------------|
| C | 2.277753000 | -7.170625000  | -1.302374000 |
| C | 2.712886000 | -9.121105000  | 2.054014000  |
| C | 3.142465000 | -6.191924000  | -2.076650000 |
| C | 1.691979000 | -9.911995000  | 2.856828000  |
| H | 3.881902000 | -8.130186000  | -0.213998000 |
| H | 3.159577000 | -6.769570000  | 0.621833000  |
| H | 1.769950000 | -9.456362000  | 0.148390000  |
| H | 1.096372000 | -8.105407000  | 1.049892000  |
| H | 1.305938000 | -6.699449000  | -1.103668000 |
| H | 2.060612000 | -8.042589000  | -1.938838000 |
| H | 3.007359000 | -8.254066000  | 2.660647000  |
| H | 4.140721000 | -6.645479000  | -2.233602000 |
| H | 3.314284000 | -5.299625000  | -1.459823000 |
| H | 3.593457000 | -10.794948000 | 1.386610000  |
| H | 4.408887000 | -10.092567000 | 2.576762000  |
| H | 2.399769000 | -6.564648000  | -3.926631000 |
| H | 3.052084000 | -5.094549000  | -3.788157000 |
| H | 0.100084000 | -9.715144000  | 3.880747000  |

**Adduct 7LysM<sub>b</sub>:**

|   |              |               |              |
|---|--------------|---------------|--------------|
| O | -5.254390000 | -12.386506000 | 2.776321000  |
| S | -4.216155000 | -11.386517000 | 2.514870000  |
| C | -2.728285000 | -12.066328000 | 3.184870000  |
| O | -4.315049000 | -10.003181000 | 2.968237000  |
| C | -3.901055000 | -11.367200000 | 0.762948000  |
| N | -1.659533000 | -11.275470000 | 3.325332000  |
| C | -3.243539000 | -10.273789000 | 0.199779000  |
| C | -4.296745000 | -12.450590000 | -0.015280000 |
| C | -1.052722000 | -13.324939000 | 3.957714000  |
| N | -0.655279000 | -12.032414000 | 3.797657000  |
| C | -2.986598000 | -10.275399000 | -1.163708000 |
| H | -2.952247000 | -9.435270000  | 0.826499000  |
| C | -4.032577000 | -12.432626000 | -1.380037000 |
| H | -4.818888000 | -13.281952000 | 0.449831000  |
| C | -0.713452000 | -14.632740000 | 4.358065000  |
| H | 0.232349000  | -11.542347000 | 3.919389000  |
| C | -3.376245000 | -11.350292000 | -1.974101000 |
| H | -2.477151000 | -9.426567000  | -1.614458000 |
| H | -4.342330000 | -13.271666000 | -1.998825000 |
| C | -3.109871000 | -11.325550000 | -3.447254000 |
| H | -3.262982000 | -12.306407000 | -3.903271000 |
| H | -3.775087000 | -10.619930000 | -3.957238000 |
| H | -2.086831000 | -11.005572000 | -3.666106000 |
| N | -2.797235000 | -14.668684000 | 3.744214000  |
| C | -2.393384000 | -13.382190000 | 3.563065000  |

|   |              |               |              |
|---|--------------|---------------|--------------|
| N | -1.772948000 | -15.428447000 | 4.212463000  |
| C | -4.057043000 | -15.291758000 | 3.411804000  |
| H | 0.211274000  | -15.037620000 | 4.740674000  |
| H | -4.082608000 | -15.593568000 | 2.359241000  |
| H | -4.868206000 | -14.587909000 | 3.598120000  |
| H | -4.166624000 | -16.176918000 | 4.037116000  |
| O | -0.719694000 | -8.728858000  | 2.839603000  |
| O | 1.091252000  | -9.870041000  | 3.573100000  |
| N | 2.722471000  | -7.621458000  | 3.265789000  |
| N | 2.793189000  | -4.860771000  | -2.790952000 |
| C | 2.054013000  | -6.239842000  | 0.688538000  |
| C | 1.429407000  | -7.534199000  | 1.181872000  |
| C | 2.150340000  | -6.174206000  | -0.827190000 |
| C | 1.378654000  | -7.633212000  | 2.712571000  |
| C | 2.751721000  | -4.874898000  | -1.332224000 |
| C | 0.572793000  | -8.863112000  | 3.100048000  |
| H | 3.046269000  | -6.127367000  | 1.142134000  |
| H | 1.458539000  | -5.390886000  | 1.056075000  |
| H | 2.002246000  | -8.392947000  | 0.798550000  |
| H | 0.412641000  | -7.642392000  | 0.784584000  |
| H | 1.159979000  | -6.302246000  | -1.284002000 |
| H | 2.756764000  | -7.018363000  | -1.190973000 |
| H | 0.834894000  | -6.755612000  | 3.087819000  |
| H | 3.733568000  | -4.722154000  | -0.842725000 |
| H | 2.122117000  | -4.036696000  | -1.004841000 |
| H | 3.122792000  | -8.543048000  | 3.105493000  |
| H | 2.659199000  | -7.548970000  | 4.276163000  |
| H | 3.454854000  | -5.564202000  | -3.105868000 |
| H | 3.171064000  | -3.974865000  | -3.109174000 |
| H | -1.184739000 | -9.583851000  | 3.056044000  |

**Adduct 7LysM<sub>c</sub>:**

|   |              |               |             |
|---|--------------|---------------|-------------|
| O | 1.796040000  | -14.222745000 | 7.878920000 |
| S | 1.887288000  | -13.028835000 | 7.035103000 |
| C | 0.791452000  | -13.317327000 | 5.680071000 |
| O | 3.147525000  | -12.538445000 | 6.486814000 |
| C | 1.105533000  | -11.684038000 | 7.902370000 |
| N | 0.923951000  | -12.583978000 | 4.568917000 |
| C | 1.317796000  | -10.377972000 | 7.460663000 |
| C | 0.286091000  | -11.951510000 | 8.993801000 |
| C | -0.841219000 | -13.913404000 | 4.277233000 |
| N | -0.055870000 | -12.948398000 | 3.725898000 |
| C | 0.695640000  | -9.333507000  | 8.128216000 |
| H | 1.972354000  | -10.194092000 | 6.612546000 |
| C | -0.326585000 | -10.890604000 | 9.652653000 |

|   |              |               |              |
|---|--------------|---------------|--------------|
| H | 0.153778000  | -12.976899000 | 9.327800000  |
| C | -1.944442000 | -14.778141000 | 4.129838000  |
| H | -0.052685000 | -12.461943000 | 2.826976000  |
| C | -0.135014000 | -9.571566000  | 9.232251000  |
| H | 0.858857000  | -8.310978000  | 7.794950000  |
| H | -0.961351000 | -11.087635000 | 10.513521000 |
| C | -0.796538000 | -8.430777000  | 9.941730000  |
| H | -1.398141000 | -8.772766000  | 10.787057000 |
| H | -0.059382000 | -7.716703000  | 10.323035000 |
| H | -1.454407000 | -7.870548000  | 9.269138000  |
| N | -1.093859000 | -15.150589000 | 6.093934000  |
| C | -0.322452000 | -14.171605000 | 5.550086000  |
| N | -2.086582000 | -15.506688000 | 5.237613000  |
| C | -1.051992000 | -15.716478000 | 7.421947000  |
| H | -2.626986000 | -14.920961000 | 3.305518000  |
| H | -1.613853000 | -15.099448000 | 8.131622000  |
| H | -0.014899000 | -15.784733000 | 7.752563000  |
| H | -1.503833000 | -16.706721000 | 7.378628000  |
| O | 2.409039000  | -10.585157000 | 3.350999000  |
| O | 0.816203000  | -11.117630000 | 1.833453000  |
| N | 1.889341000  | -9.346497000  | -0.032440000 |
| N | 2.524943000  | -3.018998000  | 1.864241000  |
| C | 2.661780000  | -6.790128000  | 1.309425000  |
| C | 1.995001000  | -7.970347000  | 1.996533000  |
| C | 2.259460000  | -5.452969000  | 1.910205000  |
| C | 2.344209000  | -9.316143000  | 1.347720000  |
| C | 2.931568000  | -4.271030000  | 1.234540000  |
| C | 1.775603000  | -10.443011000 | 2.196045000  |
| H | 2.419286000  | -6.819181000  | 0.240297000  |
| H | 3.753698000  | -6.908421000  | 1.372087000  |
| H | 0.901186000  | -7.845474000  | 1.969705000  |
| H | 2.274174000  | -8.003528000  | 3.056400000  |
| H | 2.492310000  | -5.422795000  | 2.982745000  |
| H | 1.166813000  | -5.335540000  | 1.839461000  |
| H | 3.437657000  | -9.420872000  | 1.359941000  |
| H | 2.734480000  | -4.323999000  | 0.145870000  |
| H | 4.020065000  | -4.365921000  | 1.345208000  |
| H | 0.878871000  | -9.463469000  | -0.015150000 |
| H | 2.231569000  | -10.196132000 | -0.470002000 |
| H | 1.537301000  | -2.867202000  | 1.682091000  |
| H | 3.003195000  | -2.245163000  | 1.415767000  |
| H | 1.984314000  | -11.320690000 | 3.872625000  |

**Adduct 7GluB:**

|   |              |               |              |
|---|--------------|---------------|--------------|
| O | -4.511754000 | -9.682767000  | 5.806173000  |
| S | -3.269140000 | -9.263661000  | 5.133055000  |
| C | -2.047136000 | -10.482496000 | 5.599817000  |
| O | -2.692407000 | -7.931582000  | 5.346345000  |
| C | -3.470474000 | -9.510902000  | 3.369030000  |
| N | -0.811876000 | -10.391674000 | 5.097697000  |
| C | -2.632202000 | -8.828728000  | 2.483682000  |
| C | -4.437310000 | -10.404128000 | 2.907162000  |
| C | -0.857569000 | -12.210928000 | 6.379820000  |
| N | -0.095009000 | -11.427126000 | 5.568056000  |
| C | -2.758738000 | -9.066760000  | 1.118136000  |
| H | -1.898552000 | -8.125108000  | 2.860688000  |
| C | -4.552017000 | -10.624790000 | 1.535732000  |
| H | -5.088973000 | -10.907658000 | 3.612798000  |
| C | -0.919730000 | -13.353432000 | 7.212358000  |
| H | 0.855253000  | -11.506448000 | 5.197674000  |
| C | -3.712815000 | -9.970029000  | 0.623882000  |
| H | -2.102153000 | -8.554879000  | 0.420773000  |
| H | -5.302168000 | -11.319939000 | 1.168832000  |
| C | -3.834748000 | -10.208700000 | -0.861040000 |
| H | -4.324496000 | -11.162267000 | -1.075865000 |
| H | -4.429639000 | -9.418919000  | -1.336295000 |
| H | -2.849983000 | -10.208696000 | -1.337173000 |
| N | -2.882913000 | -12.409333000 | 7.262370000  |
| C | -2.134009000 | -11.630220000 | 6.428033000  |
| N | -2.144716000 | -13.451979000 | 7.723900000  |
| C | -4.286824000 | -12.307966000 | 7.629065000  |
| H | -0.163903000 | -14.082245000 | 7.464062000  |
| H | -4.888113000 | -13.017055000 | 7.051303000  |
| H | -4.627657000 | -11.294489000 | 7.423057000  |
| H | -4.385029000 | -12.538575000 | 8.690758000  |
| O | 0.817126000  | -9.014163000  | 3.402219000  |
| O | -0.197515000 | -9.151548000  | -1.559294000 |
| O | 2.085621000  | -10.807326000 | 3.920911000  |
| O | 1.670307000  | -7.905533000  | -1.677062000 |
| N | 3.730858000  | -10.365350000 | 1.810536000  |
| C | 2.283526000  | -8.496873000  | 1.084788000  |
| C | 2.910810000  | -9.248617000  | 2.272708000  |
| C | 1.358861000  | -9.372139000  | 0.234865000  |
| C | 1.887003000  | -9.782447000  | 3.273393000  |
| C | 1.000037000  | -8.715587000  | -1.075696000 |
| H | 3.093053000  | -8.122224000  | 0.450339000  |
| H | 1.742949000  | -7.622726000  | 1.458165000  |
| H | 3.479961000  | -8.500113000  | 2.857726000  |
| H | 1.874542000  | -10.313580000 | 0.003491000  |

|   |              |               |              |
|---|--------------|---------------|--------------|
| H | 0.441806000  | -9.634193000  | 0.769555000  |
| H | 3.887319000  | -11.007809000 | 2.582470000  |
| H | 4.633255000  | -10.028015000 | 1.489710000  |
| H | 0.174676000  | -9.421312000  | 4.060391000  |
| H | -0.313200000 | -8.701541000  | -2.413901000 |

**Adduct 7GluB<sub>a</sub>:**

|   |              |               |              |
|---|--------------|---------------|--------------|
| O | 0.646389000  | -16.090089000 | 4.142404000  |
| S | 0.487441000  | -14.756643000 | 3.534674000  |
| C | 0.247709000  | -13.640421000 | 4.910742000  |
| O | -0.554550000 | -14.487841000 | 2.537272000  |
| C | 2.064021000  | -14.253905000 | 2.845564000  |
| N | 0.136959000  | -12.329507000 | 4.675177000  |
| C | 2.092543000  | -13.266009000 | 1.858176000  |
| C | 3.240320000  | -14.827395000 | 3.329094000  |
| C | 0.014191000  | -12.603605000 | 6.880764000  |
| N | -0.006749000 | -11.705547000 | 5.857239000  |
| C | 3.323443000  | -12.838072000 | 1.368690000  |
| H | 1.166788000  | -12.845188000 | 1.482187000  |
| C | 4.462566000  | -14.388282000 | 2.823444000  |
| H | 3.193193000  | -15.607503000 | 4.081047000  |
| C | -0.071829000 | -12.816225000 | 8.277036000  |
| H | -0.030533000 | -10.683720000 | 5.812832000  |
| C | 4.524560000  | -13.384888000 | 1.846570000  |
| H | 3.359042000  | -12.059541000 | 0.612285000  |
| H | 5.382789000  | -14.829201000 | 3.196759000  |
| C | 5.847523000  | -12.908438000 | 1.299074000  |
| H | 6.667507000  | -13.118492000 | 1.991122000  |
| H | 6.081065000  | -13.409076000 | 0.351242000  |
| H | 5.823645000  | -11.832430000 | 1.104224000  |
| N | 0.171991000  | -14.768017000 | 7.339407000  |
| C | 0.176431000  | -13.874033000 | 6.307566000  |
| N | 0.030847000  | -14.120075000 | 8.524897000  |
| C | 0.359911000  | -16.210386000 | 7.330000000  |
| H | -0.204397000 | -12.116119000 | 9.088250000  |
| H | 1.383403000  | -16.467049000 | 7.620946000  |
| H | 0.167912000  | -16.579660000 | 6.323735000  |
| H | -0.336209000 | -16.655205000 | 8.042484000  |
| O | 0.179252000  | -10.388969000 | 2.763612000  |
| O | 4.453624000  | -9.493057000  | 0.214545000  |
| O | 0.176132000  | -9.177777000  | 4.667942000  |
| O | 3.219268000  | -7.865024000  | -0.724188000 |
| N | 0.990521000  | -6.949612000  | 3.350861000  |
| C | 1.146604000  | -8.251498000  | 1.254696000  |
| C | 0.373106000  | -8.013999000  | 2.563637000  |

|   |              |               |              |
|---|--------------|---------------|--------------|
| C | 2.598712000  | -8.683943000  | 1.477343000  |
| C | 0.250553000  | -9.256362000  | 3.444155000  |
| C | 3.413542000  | -8.611857000  | 0.209406000  |
| H | 1.142352000  | -7.319759000  | 0.679992000  |
| H | 0.616149000  | -8.996077000  | 0.654558000  |
| H | -0.674365000 | -7.795128000  | 2.277963000  |
| H | 3.062035000  | -8.007933000  | 2.208143000  |
| H | 2.664027000  | -9.693905000  | 1.890912000  |
| H | 0.653778000  | -7.003814000  | 4.308395000  |
| H | 0.733327000  | -6.042140000  | 2.974727000  |
| H | 0.109610000  | -11.168902000 | 3.395263000  |
| H | 4.929355000  | -9.340261000  | -0.620064000 |

**Adduct 7GluB<sub>b</sub>:**

|   |              |               |              |
|---|--------------|---------------|--------------|
| O | -4.210403000 | -13.684772000 | 3.478811000  |
| S | -3.565149000 | -12.390766000 | 3.192250000  |
| C | -2.103748000 | -12.358168000 | 4.222503000  |
| O | -4.280848000 | -11.121905000 | 3.367035000  |
| C | -2.911929000 | -12.439494000 | 1.523822000  |
| N | -1.262793000 | -11.323311000 | 4.131523000  |
| C | -2.642037000 | -11.239418000 | 0.861799000  |
| C | -2.651051000 | -13.671739000 | 0.923940000  |
| C | -0.398337000 | -12.730659000 | 5.624021000  |
| N | -0.239588000 | -11.543820000 | 4.975304000  |
| C | -2.084317000 | -11.284420000 | -0.412800000 |
| H | -2.867898000 | -10.292246000 | 1.338515000  |
| C | -2.096002000 | -13.695699000 | -0.354167000 |
| H | -2.887414000 | -14.590154000 | 1.450060000  |
| C | 0.115699000  | -13.642778000 | 6.575896000  |
| H | 0.511115000  | -10.849488000 | 4.944546000  |
| C | -1.797118000 | -12.508515000 | -1.036758000 |
| H | -1.856160000 | -10.358402000 | -0.932227000 |
| H | -1.888322000 | -14.651573000 | -0.827161000 |
| C | -1.196400000 | -12.533590000 | -2.420819000 |
| H | -0.690496000 | -13.481823000 | -2.621666000 |
| H | -1.972406000 | -12.406636000 | -3.185851000 |
| H | -0.475339000 | -11.720906000 | -2.546996000 |
| N | -1.760949000 | -14.467955000 | 5.837279000  |
| C | -1.599749000 | -13.291099000 | 5.164075000  |
| N | -0.716870000 | -14.676112000 | 6.680800000  |
| C | -2.798992000 | -15.480351000 | 5.720604000  |
| H | 1.012982000  | -13.602861000 | 7.175136000  |
| H | -2.441124000 | -16.331493000 | 5.132871000  |
| H | -3.662253000 | -15.037594000 | 5.226124000  |
| H | -3.063721000 | -15.823922000 | 6.721690000  |

|   |              |              |              |
|---|--------------|--------------|--------------|
| O | -0.731408000 | -8.979813000 | 2.850285000  |
| O | 0.362283000  | -9.055740000 | -2.093408000 |
| O | 1.165390000  | -9.310735000 | 4.027519000  |
| O | 0.625786000  | -6.845910000 | -1.774163000 |
| N | 2.519155000  | -7.511982000 | 2.512509000  |
| C | 0.517636000  | -7.212453000 | 1.091810000  |
| C | 1.060662000  | -7.432897000 | 2.514866000  |
| C | 0.878200000  | -8.342206000 | 0.123477000  |
| C | 0.510648000  | -8.684014000 | 3.198127000  |
| C | 0.612260000  | -7.966044000 | -1.313485000 |
| H | 0.932744000  | -6.275383000 | 0.707072000  |
| H | -0.567236000 | -7.082617000 | 1.137941000  |
| H | 0.668395000  | -6.604484000 | 3.136487000  |
| H | 1.950500000  | -8.560025000 | 0.215837000  |
| H | 0.343697000  | -9.266560000 | 0.358628000  |
| H | 2.831977000  | -7.939719000 | 3.379915000  |
| H | 2.920568000  | -6.581077000 | 2.454722000  |
| H | -1.033611000 | -9.815984000 | 3.321186000  |
| H | 0.244143000  | -8.709929000 | -2.994905000 |

**Adduct 7GluB<sub>c</sub>:**

|   |              |               |             |
|---|--------------|---------------|-------------|
| O | -4.553522000 | -10.925317000 | 6.780446000 |
| S | -3.430628000 | -10.013364000 | 6.496856000 |
| C | -2.068631000 | -11.077765000 | 6.038443000 |
| O | -2.950721000 | -9.053895000  | 7.497900000 |
| C | -3.797136000 | -9.114067000  | 4.990253000 |
| N | -0.916842000 | -10.531471000 | 5.636771000 |
| C | -3.141977000 | -7.906175000  | 4.739669000 |
| C | -4.704903000 | -9.648776000  | 4.075857000 |
| C | -0.664563000 | -12.739958000 | 5.512776000 |
| N | -0.071167000 | -11.528852000 | 5.323734000 |
| C | -3.392485000 | -7.240340000  | 3.543105000 |
| H | -2.453730000 | -7.499228000  | 5.471899000 |
| C | -4.945079000 | -8.965168000  | 2.885403000 |
| H | -5.215660000 | -10.578475000 | 4.301672000 |
| C | -0.536118000 | -14.148092000 | 5.457391000 |
| H | 0.827520000  | -11.235072000 | 4.933034000 |
| C | -4.289513000 | -7.760273000  | 2.596840000 |
| H | -2.878510000 | -6.307699000  | 3.329605000 |
| H | -5.649444000 | -9.376392000  | 2.167558000 |
| C | -4.547647000 | -7.019978000  | 1.307562000 |
| H | -4.963216000 | -7.680465000  | 0.541845000 |
| H | -5.264143000 | -6.203759000  | 1.462381000 |
| H | -3.624923000 | -6.576953000  | 0.921880000 |
| N | -2.541570000 | -13.709896000 | 6.188337000 |

|   |              |               |             |
|---|--------------|---------------|-------------|
| C | -1.964109000 | -12.490578000 | 5.979128000 |
| N | -1.675848000 | -14.704371000 | 5.861923000 |
| C | -3.892007000 | -14.046233000 | 6.611280000 |
| H | 0.297489000  | -14.767243000 | 5.161545000 |
| H | -4.512637000 | -14.308067000 | 5.748486000 |
| H | -4.324215000 | -13.183500000 | 7.115837000 |
| H | -3.838875000 | -14.901245000 | 7.286493000 |
| O | 0.395674000  | -8.201354000  | 5.111835000 |
| O | -1.165986000 | -5.252528000  | 1.300570000 |
| O | 1.835661000  | -9.743383000  | 4.310745000 |
| O | 0.601519000  | -4.012330000  | 1.927330000 |
| N | 3.179055000  | -7.867239000  | 2.882679000 |
| C | 1.556106000  | -6.152757000  | 3.617630000 |
| C | 2.359235000  | -7.408286000  | 4.001203000 |
| C | 0.586955000  | -6.384259000  | 2.455352000 |
| C | 1.494009000  | -8.574800000  | 4.475235000 |
| C | 0.049746000  | -5.090124000  | 1.895273000 |
| H | 2.263119000  | -5.366895000  | 3.333349000 |
| H | 1.016204000  | -5.789730000  | 4.496618000 |
| H | 2.952150000  | -7.144388000  | 4.898713000 |
| H | 1.119883000  | -6.899764000  | 1.645401000 |
| H | -0.250316000 | -7.025354000  | 2.744442000 |
| H | 3.466034000  | -8.827711000  | 3.050939000 |
| H | 4.014377000  | -7.295376000  | 2.803304000 |
| H | -0.136229000 | -9.008990000  | 5.388761000 |
| H | -1.401139000 | -4.378636000  | 0.943931000 |

#### Adduct 7GluB6:

|   |              |               |             |
|---|--------------|---------------|-------------|
| O | -4.549408000 | -9.671377000  | 6.097869000 |
| S | -3.476876000 | -9.270529000  | 5.177514000 |
| C | -2.163586000 | -10.453366000 | 5.444283000 |
| O | -2.937836000 | -7.915479000  | 5.198827000 |
| C | -4.069888000 | -9.592945000  | 3.506785000 |
| N | -0.988512000 | -10.250566000 | 4.859351000 |
| C | -3.407110000 | -9.013588000  | 2.429701000 |
| C | -5.192263000 | -10.387204000 | 3.315809000 |
| C | -0.880873000 | -12.169080000 | 6.036959000 |
| N | -0.208134000 | -11.276934000 | 5.241234000 |
| C | -3.881529000 | -9.245984000  | 1.146802000 |
| H | -2.553175000 | -8.374700000  | 2.607571000 |
| C | -5.653801000 | -10.607688000 | 2.020793000 |
| H | -5.707452000 | -10.803506000 | 4.170425000 |
| C | -0.831067000 | -13.355160000 | 6.800428000 |
| H | 0.746268000  | -11.328921000 | 4.893223000 |
| C | -5.007653000 | -10.046715000 | 0.918658000 |

|   |              |               |              |
|---|--------------|---------------|--------------|
| H | -3.380358000 | -8.781273000  | 0.306213000  |
| H | -6.538113000 | -11.214469000 | 1.870009000  |
| C | -5.504814000 | -10.287965000 | -0.484023000 |
| H | -6.460029000 | -10.812428000 | -0.482229000 |
| H | -5.635340000 | -9.347203000  | -1.023451000 |
| H | -4.792571000 | -10.892984000 | -1.052244000 |
| N | -2.825637000 | -12.521516000 | 7.025771000  |
| C | -2.167026000 | -11.662471000 | 6.197113000  |
| N | -2.014863000 | -13.549681000 | 7.371586000  |
| C | -4.208520000 | -12.508353000 | 7.479804000  |
| H | -0.028200000 | -14.051679000 | 6.972977000  |
| H | -4.821944000 | -13.160846000 | 6.854406000  |
| H | -4.586792000 | -11.491470000 | 7.422685000  |
| H | -4.235427000 | -12.867673000 | 8.506234000  |
| O | 1.115501000  | -8.715995000  | 3.125620000  |
| O | 1.632875000  | -9.637122000  | -2.093611000 |
| O | 2.233152000  | -10.463451000 | 3.952768000  |
| O | 3.237114000  | -8.098226000  | -1.800265000 |
| N | 4.415438000  | -10.024147000 | 2.377881000  |
| C | 3.081621000  | -8.401956000  | 1.063262000  |
| C | 3.404068000  | -8.972008000  | 2.459372000  |
| C | 2.555674000  | -9.452286000  | 0.080169000  |
| C | 2.202936000  | -9.502379000  | 3.228789000  |
| C | 2.535329000  | -8.961012000  | -1.342992000 |
| H | 4.007983000  | -7.986134000  | 0.664429000  |
| H | 2.382135000  | -7.569235000  | 1.153697000  |
| H | 3.734641000  | -8.126786000  | 3.083613000  |
| H | 3.216847000  | -10.324215000 | 0.098665000  |
| H | 1.556815000  | -9.807184000  | 0.337509000  |
| H | 4.424958000  | -10.604885000 | 3.209551000  |
| H | 5.340429000  | -9.632453000  | 2.251066000  |
| H | 0.492782000  | -8.995902000  | 3.772158000  |
| H | 1.696432000  | -9.315448000  | -3.003566000 |

**Adduct 7GluB6<sub>a</sub>:**

|   |              |               |             |
|---|--------------|---------------|-------------|
| O | 0.541435000  | -16.430392000 | 4.439065000 |
| S | 0.518978000  | -15.201817000 | 3.631047000 |
| C | 0.315810000  | -13.873944000 | 4.808799000 |
| O | -0.451825000 | -15.018587000 | 2.554624000 |
| C | 2.164945000  | -14.961119000 | 2.943310000 |
| N | 0.123760000  | -12.635386000 | 4.365556000 |
| C | 2.339145000  | -14.065234000 | 1.889040000 |
| C | 3.232821000  | -15.689977000 | 3.454040000 |
| C | 0.105686000  | -12.562108000 | 6.601131000 |
| N | 0.004882000  | -11.844792000 | 5.441540000 |

|   |              |               |              |
|---|--------------|---------------|--------------|
| C | 3.608691000  | -13.898292000 | 1.351634000  |
| H | 1.490589000  | -13.521446000 | 1.494118000  |
| C | 4.498435000  | -15.511485000 | 2.899257000  |
| H | 3.068773000  | -16.397967000 | 4.256581000  |
| C | 0.061220000  | -12.550198000 | 8.013044000  |
| H | -0.176248000 | -10.859836000 | 5.288069000  |
| C | 4.707279000  | -14.614843000 | 1.847418000  |
| H | 3.748647000  | -13.207200000 | 0.526775000  |
| H | 5.332940000  | -16.084968000 | 3.288166000  |
| C | 6.079794000  | -14.413057000 | 1.255245000  |
| H | 6.795734000  | -15.134876000 | 1.651807000  |
| H | 6.059085000  | -14.517982000 | 0.167025000  |
| H | 6.457264000  | -13.409899000 | 1.477616000  |
| N | 0.383887000  | -14.610258000 | 7.390006000  |
| C | 0.316649000  | -13.893413000 | 6.231417000  |
| N | 0.239578000  | -13.790128000 | 8.459089000  |
| C | 0.659713000  | -16.023611000 | 7.601568000  |
| H | -0.084958000 | -11.740654000 | 8.709724000  |
| H | 1.717638000  | -16.177390000 | 7.830887000  |
| H | 0.400154000  | -16.568589000 | 6.696915000  |
| H | 0.057461000  | -16.366273000 | 8.441773000  |
| O | -0.210366000 | -9.736307000  | 2.096887000  |
| O | 4.463682000  | -7.934168000  | 0.421746000  |
| O | 0.007298000  | -9.166079000  | 4.256454000  |
| O | 3.100735000  | -6.319457000  | -0.333067000 |
| N | 0.544525000  | -6.560436000  | 3.659275000  |
| C | 0.945007000  | -7.270971000  | 1.325158000  |
| C | 0.065447000  | -7.417686000  | 2.581213000  |
| C | 2.405242000  | -7.653241000  | 1.566803000  |
| C | -0.034657000 | -8.845960000  | 3.091257000  |
| C | 3.316373000  | -7.212869000  | 0.446454000  |
| H | 0.896194000  | -6.227306000  | 1.004770000  |
| H | 0.521929000  | -7.868405000  | 0.515245000  |
| H | -0.969102000 | -7.183418000  | 2.273364000  |
| H | 2.760935000  | -7.158997000  | 2.478442000  |
| H | 2.530967000  | -8.726960000  | 1.724667000  |
| H | 0.215251000  | -6.881212000  | 4.562471000  |
| H | 0.259376000  | -5.598900000  | 3.520408000  |
| H | -0.265372000 | -10.620889000 | 2.478531000  |
| H | 5.014081000  | -7.573602000  | -0.289562000 |

**Adduct 7GluB6<sub>b</sub>:**

|   |              |               |             |
|---|--------------|---------------|-------------|
| O | -4.304362000 | -13.373084000 | 3.328884000 |
| S | -3.448342000 | -12.264738000 | 2.873906000 |
| C | -2.055028000 | -12.249287000 | 3.991501000 |

|   |              |               |              |
|---|--------------|---------------|--------------|
| O | -3.960100000 | -10.896123000 | 2.767487000  |
| C | -2.749493000 | -12.725292000 | 1.285371000  |
| N | -1.189022000 | -11.236867000 | 3.923167000  |
| C | -2.119596000 | -11.751394000 | 0.508324000  |
| C | -2.849118000 | -14.043384000 | 0.848735000  |
| C | -0.453001000 | -12.641518000 | 5.499172000  |
| N | -0.230387000 | -11.469943000 | 4.836058000  |
| C | -1.572143000 | -12.116721000 | -0.715585000 |
| H | -2.069749000 | -10.726271000 | 0.855140000  |
| C | -2.301278000 | -14.388869000 | -0.385541000 |
| H | -3.362275000 | -14.776090000 | 1.459914000  |
| C | -0.027056000 | -13.541155000 | 6.503546000  |
| H | 0.526584000  | -10.785631000 | 4.871366000  |
| C | -1.651371000 | -13.438723000 | -1.180247000 |
| H | -1.074554000 | -11.364948000 | -1.320626000 |
| H | -2.384245000 | -15.412728000 | -0.736181000 |
| C | -1.042510000 | -13.818642000 | -2.507132000 |
| H | -1.303009000 | -14.840836000 | -2.789600000 |
| H | -1.381615000 | -13.149570000 | -3.303813000 |
| H | 0.050018000  | -13.748897000 | -2.470577000 |
| N | -1.866853000 | -14.339603000 | 5.656719000  |
| C | -1.631259000 | -13.182810000 | 4.973369000  |
| N | -0.887100000 | -14.553966000 | 6.571550000  |
| C | -2.915750000 | -15.331238000 | 5.478330000  |
| H | 0.826705000  | -13.508301000 | 7.162163000  |
| H | -2.563497000 | -16.157393000 | 4.853461000  |
| H | -3.770064000 | -14.854739000 | 5.000566000  |
| H | -3.192118000 | -15.717814000 | 6.459032000  |
| O | -0.554962000 | -8.219981000  | 3.515161000  |
| O | -0.838568000 | -7.915725000  | -1.572326000 |
| O | 1.358549000  | -9.326980000  | 3.938383000  |
| O | 0.092060000  | -5.906668000  | -1.187788000 |
| N | 2.793041000  | -7.714837000  | 2.297314000  |
| C | 0.686712000  | -6.661136000  | 1.537087000  |
| C | 1.477832000  | -7.242483000  | 2.724730000  |
| C | 0.425796000  | -7.683971000  | 0.428018000  |
| C | 0.760739000  | -8.381290000  | 3.445872000  |
| C | -0.105780000 | -7.044394000  | -0.829479000 |
| H | 1.263947000  | -5.830821000  | 1.120715000  |
| H | -0.254695000 | -6.240552000  | 1.898903000  |
| H | 1.533570000  | -6.448709000  | 3.492397000  |
| H | 1.370320000  | -8.177614000  | 0.168957000  |
| H | -0.264275000 | -8.468547000  | 0.747373000  |
| H | 3.171947000  | -8.360036000  | 2.984429000  |
| H | 3.436470000  | -6.936253000  | 2.201543000  |
| H | -0.962639000 | -9.007392000  | 3.946821000  |

|   |              |              |              |
|---|--------------|--------------|--------------|
| H | -1.108305000 | -7.435275000 | -2.371994000 |
|---|--------------|--------------|--------------|

**Adduct 7GluB6:**

|   |              |               |             |
|---|--------------|---------------|-------------|
| O | -4.313136000 | -10.853794000 | 7.038728000 |
| S | -3.367755000 | -9.925411000  | 6.404623000 |
| C | -2.030834000 | -10.950838000 | 5.805477000 |
| O | -2.775036000 | -8.807594000  | 7.136600000 |
| C | -4.144955000 | -9.265764000  | 4.923857000 |
| N | -0.885034000 | -10.379373000 | 5.430557000 |
| C | -3.651555000 | -8.086023000  | 4.368869000 |
| C | -5.233003000 | -9.927485000  | 4.361390000 |
| C | -0.655329000 | -12.570602000 | 5.113743000 |
| N | -0.057793000 | -11.351075000 | 5.014406000 |
| C | -4.253235000 | -7.577554000  | 3.223720000 |
| H | -2.825675000 | -7.568073000  | 4.840269000 |
| C | -5.823626000 | -9.401152000  | 3.215818000 |
| H | -5.623623000 | -10.822951000 | 4.828219000 |
| C | -0.533264000 | -13.969428000 | 4.949379000 |
| H | 0.872664000  | -11.049454000 | 4.718848000 |
| C | -5.341488000 | -8.227296000  | 2.625866000 |
| H | -3.877231000 | -6.655953000  | 2.792297000 |
| H | -6.678759000 | -9.906862000  | 2.780364000 |
| C | -5.966315000 | -7.679153000  | 1.367678000 |
| H | -6.989274000 | -8.038443000  | 1.240016000 |
| H | -5.985328000 | -6.586945000  | 1.376314000 |
| H | -5.394574000 | -7.988642000  | 0.486134000 |
| N | -2.522955000 | -13.581418000 | 5.745851000 |
| C | -1.943109000 | -12.353392000 | 5.619536000 |
| N | -1.668000000 | -14.547189000 | 5.329135000 |
| C | -3.869224000 | -13.940818000 | 6.166249000 |
| H | 0.289521000  | -14.568384000 | 4.594183000 |
| H | -4.514518000 | -14.095207000 | 5.297210000 |
| H | -4.267864000 | -13.137162000 | 6.781885000 |
| H | -3.813387000 | -14.865400000 | 6.739003000 |
| O | 0.554898000  | -8.013695000  | 5.253239000 |
| O | 0.342008000  | -5.148386000  | 0.800064000 |
| O | 2.027082000  | -9.540220000  | 4.503228000 |
| O | 1.465791000  | -3.795833000  | 2.195873000 |
| N | 3.839086000  | -7.656988000  | 3.791798000 |
| C | 2.048464000  | -5.961275000  | 3.997529000 |
| C | 2.701330000  | -7.222671000  | 4.597740000 |
| C | 1.497227000  | -6.189574000  | 2.590870000 |
| C | 1.727592000  | -8.384036000  | 4.762556000 |
| C | 1.123821000  | -4.910368000  | 1.886616000 |
| H | 2.807366000  | -5.175706000  | 3.961617000 |

|   |              |              |             |
|---|--------------|--------------|-------------|
| H | 1.260936000  | -5.608220000 | 4.665998000 |
| H | 2.983614000  | -6.971631000 | 5.634138000 |
| H | 2.255903000  | -6.687908000 | 1.976348000 |
| H | 0.624141000  | -6.847960000 | 2.595385000 |
| H | 4.022550000  | -8.644669000 | 3.931491000 |
| H | 4.673377000  | -7.130532000 | 4.021230000 |
| H | -0.037110000 | -8.806547000 | 5.388829000 |
| H | 0.176868000  | -4.291515000 | 0.378445000 |

**Adduct 7GluC:**

|   |              |               |              |
|---|--------------|---------------|--------------|
| O | -4.527098000 | -9.794300000  | 5.742432000  |
| S | -3.292743000 | -9.337315000  | 5.100316000  |
| C | -2.055776000 | -10.515042000 | 5.579386000  |
| O | -2.763635000 | -7.999301000  | 5.332167000  |
| C | -3.447728000 | -9.577057000  | 3.346812000  |
| N | -0.827175000 | -10.399908000 | 5.090293000  |
| C | -2.614082000 | -8.867290000  | 2.488193000  |
| C | -4.371097000 | -10.494399000 | 2.862286000  |
| C | -0.840118000 | -12.202866000 | 6.371960000  |
| N | -0.092129000 | -11.408535000 | 5.564001000  |
| C | -2.700876000 | -9.102046000  | 1.124803000  |
| H | -1.912824000 | -8.143287000  | 2.886812000  |
| C | -4.445756000 | -10.713210000 | 1.493439000  |
| H | -5.022159000 | -11.019146000 | 3.552100000  |
| C | -0.882873000 | -13.343845000 | 7.205302000  |
| H | 0.861268000  | -11.465314000 | 5.199419000  |
| C | -3.609841000 | -10.030399000 | 0.609187000  |
| H | -2.047689000 | -8.567837000  | 0.442364000  |
| H | -5.162637000 | -11.430094000 | 1.105223000  |
| C | -3.686749000 | -10.266737000 | -0.874562000 |
| H | -4.149804000 | -11.228925000 | -1.103101000 |
| H | -4.285034000 | -9.488686000  | -1.360604000 |
| H | -2.690025000 | -10.243787000 | -1.321202000 |
| N | -2.857881000 | -12.450256000 | 7.234659000  |
| C | -2.121613000 | -11.657247000 | 6.409876000  |
| N | -2.102491000 | -13.464507000 | 7.701610000  |
| C | -4.257026000 | -12.368104000 | 7.604813000  |
| H | -0.113902000 | -14.055591000 | 7.463212000  |
| H | -4.830425000 | -13.150206000 | 7.101245000  |
| H | -4.636013000 | -11.392041000 | 7.308103000  |
| H | -4.344654000 | -12.499194000 | 8.683502000  |
| O | 0.747010000  | -8.982211000  | 3.407254000  |
| O | -0.264085000 | -9.098459000  | -1.514233000 |
| O | 2.049080000  | -10.733276000 | 3.932558000  |
| O | 1.548259000  | -7.793233000  | -1.595465000 |

|   |              |               |              |
|---|--------------|---------------|--------------|
| N | 3.658876000  | -10.275280000 | 1.817472000  |
| C | 2.201999000  | -8.417585000  | 1.121409000  |
| C | 2.842394000  | -9.170020000  | 2.290994000  |
| C | 1.279562000  | -9.293493000  | 0.282327000  |
| C | 1.830635000  | -9.718746000  | 3.284139000  |
| C | 0.906631000  | -8.633950000  | -1.015010000 |
| H | 2.999619000  | -8.032668000  | 0.480155000  |
| H | 1.658188000  | -7.551293000  | 1.505093000  |
| H | 3.411613000  | -8.427990000  | 2.880130000  |
| H | 1.796623000  | -10.230371000 | 0.043105000  |
| H | 0.368724000  | -9.560776000  | 0.823201000  |
| H | 3.821508000  | -10.926511000 | 2.578355000  |
| H | 4.553414000  | -9.939187000  | 1.479978000  |
| H | 0.114804000  | -9.404747000  | 4.063629000  |
| H | -0.390070000 | -8.638307000  | -2.359938000 |

**Adduct 7GluC<sub>a</sub>:**

|   |              |               |             |
|---|--------------|---------------|-------------|
| O | 0.677759000  | -16.052835000 | 4.144379000 |
| S | 0.500914000  | -14.729608000 | 3.542228000 |
| C | 0.256246000  | -13.626377000 | 4.909711000 |
| O | -0.541753000 | -14.475598000 | 2.556091000 |
| C | 2.054068000  | -14.210283000 | 2.853762000 |
| N | 0.150926000  | -12.323305000 | 4.679970000 |
| C | 2.066049000  | -13.220968000 | 1.875666000 |
| C | 3.233104000  | -14.771311000 | 3.327632000 |
| C | 0.015489000  | -12.600430000 | 6.870265000 |
| N | 0.004488000  | -11.702163000 | 5.852401000 |
| C | 3.284895000  | -12.779078000 | 1.384558000 |
| H | 1.133244000  | -12.809496000 | 1.507655000 |
| C | 4.443540000  | -14.317688000 | 2.821895000 |
| H | 3.195076000  | -15.555497000 | 4.075124000 |
| C | -0.074651000 | -12.815226000 | 8.264412000 |
| H | -0.016816000 | -10.681000000 | 5.807608000 |
| C | 4.488047000  | -13.313523000 | 1.853846000 |
| H | 3.312213000  | -11.997978000 | 0.631600000 |
| H | 5.370419000  | -14.748138000 | 3.188211000 |
| C | 5.798736000  | -12.819766000 | 1.304636000 |
| H | 6.623143000  | -13.026926000 | 1.990202000 |
| H | 6.029766000  | -13.310725000 | 0.353225000 |
| H | 5.759512000  | -11.743793000 | 1.120042000 |
| N | 0.170826000  | -14.755094000 | 7.328209000 |
| C | 0.175702000  | -13.862298000 | 6.301433000 |
| N | 0.023894000  | -14.111888000 | 8.503730000 |
| C | 0.318616000  | -16.197208000 | 7.313384000 |
| H | -0.205097000 | -12.116824000 | 9.076598000 |

|   |              |               |              |
|---|--------------|---------------|--------------|
| H | 1.276168000  | -16.482798000 | 7.754810000  |
| H | 0.276734000  | -16.536693000 | 6.280260000  |
| H | -0.489479000 | -16.645053000 | 7.892740000  |
| O | 0.208702000  | -10.413962000 | 2.764777000  |
| O | 4.456533000  | -9.578179000  | 0.225763000  |
| O | 0.202392000  | -9.206784000  | 4.656984000  |
| O | 3.209033000  | -7.989855000  | -0.731185000 |
| N | 1.058680000  | -7.007813000  | 3.348252000  |
| C | 1.171991000  | -8.302847000  | 1.258013000  |
| C | 0.415511000  | -8.049369000  | 2.564337000  |
| C | 2.607079000  | -8.766553000  | 1.478548000  |
| C | 0.281254000  | -9.285851000  | 3.438298000  |
| C | 3.414024000  | -8.712895000  | 0.212534000  |
| H | 1.188211000  | -7.373372000  | 0.682222000  |
| H | 0.623797000  | -9.035408000  | 0.661077000  |
| H | -0.628160000 | -7.808034000  | 2.291626000  |
| H | 3.087891000  | -8.104395000  | 2.208380000  |
| H | 2.649861000  | -9.778285000  | 1.888388000  |
| H | 0.736116000  | -7.059684000  | 4.308887000  |
| H | 0.832214000  | -6.091830000  | 2.978370000  |
| H | 0.133312000  | -11.190124000 | 3.398160000  |
| H | 4.925286000  | -9.437772000  | -0.612915000 |

**Adduct 7GluC<sub>b</sub>:**

|   |              |               |              |
|---|--------------|---------------|--------------|
| O | -4.190459000 | -13.648702000 | 3.459864000  |
| S | -3.545036000 | -12.362694000 | 3.187092000  |
| C | -2.098590000 | -12.342715000 | 4.214029000  |
| O | -4.253096000 | -11.101752000 | 3.368185000  |
| C | -2.889832000 | -12.399023000 | 1.536229000  |
| N | -1.255924000 | -11.320614000 | 4.129072000  |
| C | -2.610776000 | -11.198710000 | 0.890557000  |
| C | -2.631959000 | -13.622023000 | 0.930444000  |
| C | -0.407028000 | -12.729251000 | 5.608422000  |
| N | -0.239745000 | -11.545508000 | 4.965076000  |
| C | -2.046258000 | -11.234563000 | -0.375065000 |
| H | -2.836381000 | -10.255965000 | 1.375490000  |
| C | -2.069013000 | -13.637556000 | -0.338286000 |
| H | -2.877883000 | -14.542310000 | 1.447838000  |
| C | 0.101650000  | -13.648564000 | 6.554075000  |
| H | 0.513368000  | -10.854788000 | 4.935575000  |
| C | -1.761334000 | -12.450118000 | -1.003479000 |
| H | -1.809296000 | -10.307441000 | -0.886976000 |
| H | -1.861209000 | -14.588499000 | -0.818994000 |
| C | -1.150604000 | -12.464097000 | -2.378325000 |
| H | -0.655889000 | -13.415095000 | -2.586632000 |

|   |              |               |              |
|---|--------------|---------------|--------------|
| H | -1.918667000 | -12.316819000 | -3.145112000 |
| H | -0.419659000 | -11.659195000 | -2.484206000 |
| N | -1.768947000 | -14.455637000 | 5.812619000  |
| C | -1.602749000 | -13.278736000 | 5.150404000  |
| N | -0.733882000 | -14.668912000 | 6.649576000  |
| C | -2.819213000 | -15.448846000 | 5.702963000  |
| H | 0.999498000  | -13.618240000 | 7.151882000  |
| H | -2.450544000 | -16.335735000 | 5.181959000  |
| H | -3.646347000 | -15.016498000 | 5.143205000  |
| H | -3.143619000 | -15.731831000 | 6.704569000  |
| O | -0.733486000 | -9.001370000  | 2.839164000  |
| O | 0.310642000  | -9.116859000  | -2.075163000 |
| O | 1.150342000  | -9.339809000  | 4.011492000  |
| O | 0.547588000  | -6.917520000  | -1.756928000 |
| N | 2.515100000  | -7.593406000  | 2.473274000  |
| C | 0.509204000  | -7.258518000  | 1.086404000  |
| C | 1.066201000  | -7.479633000  | 2.495053000  |
| C | 0.828991000  | -8.402262000  | 0.131418000  |
| C | 0.504006000  | -8.713772000  | 3.182078000  |
| C | 0.551773000  | -8.033341000  | -1.298299000 |
| H | 0.938818000  | -6.336371000  | 0.685424000  |
| H | -0.570688000 | -7.104519000  | 1.146539000  |
| H | 0.703598000  | -6.643905000  | 3.121013000  |
| H | 1.894879000  | -8.646923000  | 0.211314000  |
| H | 0.273651000  | -9.309276000  | 0.381362000  |
| H | 2.833096000  | -8.028859000  | 3.332810000  |
| H | 2.943967000  | -6.678577000  | 2.394322000  |
| H | -1.039771000 | -9.831467000  | 3.315050000  |
| H | 0.181684000  | -8.772418000  | -2.973803000 |

**Adduct 7GluC<sub>c</sub>:**

|   |              |               |             |
|---|--------------|---------------|-------------|
| O | -4.579786000 | -10.895704000 | 6.769452000 |
| S | -3.454217000 | -9.987240000  | 6.485301000 |
| C | -2.087931000 | -11.056768000 | 6.052163000 |
| O | -2.983546000 | -9.015749000  | 7.479088000 |
| C | -3.806481000 | -9.106036000  | 4.964644000 |
| N | -0.931928000 | -10.514523000 | 5.657139000 |
| C | -3.147528000 | -7.902100000  | 4.705149000 |
| C | -4.706001000 | -9.651260000  | 4.048289000 |
| C | -0.678639000 | -12.724143000 | 5.557624000 |
| N | -0.083169000 | -11.514945000 | 5.362863000 |
| C | -3.385322000 | -7.251345000  | 3.497727000 |
| H | -2.466059000 | -7.486588000  | 5.438902000 |
| C | -4.933671000 | -8.982584000  | 2.846945000 |
| H | -5.220142000 | -10.577456000 | 4.280755000 |

|   |              |               |             |
|---|--------------|---------------|-------------|
| C | -0.549644000 | -14.132738000 | 5.517675000 |
| H | 0.819727000  | -11.225103000 | 4.979039000 |
| C | -4.273681000 | -7.782293000  | 2.549392000 |
| H | -2.867942000 | -6.322189000  | 3.277354000 |
| H | -5.631440000 | -9.402213000  | 2.127517000 |
| C | -4.518421000 | -7.058209000  | 1.248340000 |
| H | -4.920983000 | -7.729529000  | 0.485085000 |
| H | -5.240913000 | -6.243885000  | 1.384399000 |
| H | -3.592929000 | -6.615123000  | 0.869531000 |
| N | -2.562727000 | -13.687410000 | 6.222821000 |
| C | -1.983012000 | -12.470159000 | 6.007784000 |
| N | -1.693559000 | -14.685026000 | 5.915797000 |
| C | -3.917358000 | -14.019655000 | 6.635457000 |
| H | 0.287003000  | -14.754741000 | 5.236760000 |
| H | -4.527257000 | -14.296634000 | 5.769755000 |
| H | -4.356686000 | -13.149608000 | 7.120895000 |
| H | -3.870964000 | -14.863516000 | 7.325088000 |
| O | 0.386490000  | -8.189401000  | 5.123816000 |
| O | -1.138621000 | -5.279792000  | 1.269906000 |
| O | 1.834561000  | -9.739290000  | 4.353069000 |
| O | 0.623777000  | -4.033378000  | 1.898699000 |
| N | 3.192467000  | -7.877671000  | 2.919885000 |
| C | 1.562094000  | -6.155945000  | 3.620586000 |
| C | 2.361238000  | -7.407388000  | 4.025187000 |
| C | 0.604126000  | -6.399612000  | 2.451526000 |
| C | 1.491251000  | -8.569135000  | 4.502237000 |
| C | 0.072073000  | -5.111371000  | 1.873211000 |
| H | 2.271908000  | -5.373117000  | 3.334908000 |
| H | 1.013712000  | -5.783615000  | 4.490387000 |
| H | 2.944991000  | -7.134282000  | 4.925947000 |
| H | 1.144806000  | -6.923254000  | 1.651998000 |
| H | -0.235740000 | -7.037915000  | 2.739238000 |
| H | 3.477564000  | -8.836390000  | 3.100873000 |
| H | 4.028666000  | -7.306700000  | 2.843374000 |
| H | -0.148267000 | -8.994248000  | 5.403280000 |
| H | -1.370640000 | -4.409592000  | 0.902356000 |

**Adduct 7GluP:**

|   |              |               |             |
|---|--------------|---------------|-------------|
| O | -4.500074000 | -9.721846000  | 5.773024000 |
| S | -3.268932000 | -9.296420000  | 5.102242000 |
| C | -2.042921000 | -10.486942000 | 5.573808000 |
| O | -2.708038000 | -7.964516000  | 5.298270000 |
| C | -3.458365000 | -9.565178000  | 3.356791000 |
| N | -0.806383000 | -10.367705000 | 5.095420000 |
| C | -2.630007000 | -8.879304000  | 2.470831000 |

|   |              |               |              |
|---|--------------|---------------|--------------|
| C | -4.401632000 | -10.482057000 | 2.903655000  |
| C | -0.837085000 | -12.203243000 | 6.329171000  |
| N | -0.083890000 | -11.390277000 | 5.548452000  |
| C | -2.742102000 | -9.138330000  | 1.111631000  |
| H | -1.914985000 | -8.154491000  | 2.846336000  |
| C | -4.501992000 | -10.723790000 | 1.538591000  |
| H | -5.047411000 | -10.986892000 | 3.614995000  |
| C | -0.892449000 | -13.361298000 | 7.133997000  |
| H | 0.871464000  | -11.442720000 | 5.185019000  |
| C | -3.671222000 | -10.066452000 | 0.626230000  |
| H | -2.092858000 | -8.622438000  | 0.409463000  |
| H | -5.235074000 | -11.439000000 | 1.174978000  |
| C | -3.776845000 | -10.327256000 | -0.848547000 |
| H | -4.239639000 | -11.296011000 | -1.053211000 |
| H | -4.389622000 | -9.559489000  | -1.335638000 |
| H | -2.789434000 | -10.306860000 | -1.318324000 |
| N | -2.861570000 | -12.459352000 | 7.173030000  |
| C | -2.121108000 | -11.650336000 | 6.371915000  |
| N | -2.119399000 | -13.488124000 | 7.620154000  |
| C | -4.261350000 | -12.382134000 | 7.523759000  |
| H | -0.129841000 | -14.084042000 | 7.383142000  |
| H | -4.841245000 | -13.112297000 | 6.951341000  |
| H | -4.620214000 | -11.378156000 | 7.298898000  |
| H | -4.367365000 | -12.596778000 | 8.588064000  |
| O | 0.773954000  | -8.942861000  | 3.450501000  |
| O | -0.181175000 | -9.162450000  | -1.522990000 |
| O | 2.066456000  | -10.713510000 | 3.946465000  |
| O | 1.612875000  | -7.827520000  | -1.594288000 |
| N | 3.691861000  | -10.221482000 | 1.857978000  |
| C | 2.212343000  | -8.391292000  | 1.150012000  |
| C | 2.858647000  | -9.130173000  | 2.324189000  |
| C | 1.321346000  | -9.292045000  | 0.307543000  |
| C | 1.848753000  | -9.686476000  | 3.314309000  |
| C | 0.968567000  | -8.666248000  | -1.010482000 |
| H | 3.007158000  | -7.989770000  | 0.512860000  |
| H | 1.645683000  | -7.535690000  | 1.528228000  |
| H | 3.410709000  | -8.373781000  | 2.915830000  |
| H | 1.862563000  | -10.225228000 | 0.098022000  |
| H | 0.403164000  | -9.569535000  | 0.834110000  |
| H | 3.844781000  | -10.873385000 | 2.620459000  |
| H | 4.590745000  | -9.871836000  | 1.548787000  |
| H | 0.138077000  | -9.373741000  | 4.100445000  |
| H | -0.290722000 | -8.723818000  | -2.380270000 |

**Adduct 7GluP<sub>a</sub>:**

|   |              |               |              |
|---|--------------|---------------|--------------|
| O | 0.637571000  | -16.053686000 | 4.148041000  |
| S | 0.478824000  | -14.724817000 | 3.551899000  |
| C | 0.275451000  | -13.619427000 | 4.923064000  |
| O | -0.568662000 | -14.441430000 | 2.577337000  |
| C | 2.033803000  | -14.230936000 | 2.850204000  |
| N | 0.146569000  | -12.315052000 | 4.690351000  |
| C | 2.050334000  | -13.244580000 | 1.866129000  |
| C | 3.211373000  | -14.803800000 | 3.320438000  |
| C | 0.119804000  | -12.575127000 | 6.886435000  |
| N | 0.050267000  | -11.690124000 | 5.862064000  |
| C | 3.272705000  | -12.816917000 | 1.365988000  |
| H | 1.117845000  | -12.826539000 | 1.500962000  |
| C | 4.424916000  | -14.364813000 | 2.804318000  |
| H | 3.168773000  | -15.585485000 | 4.072169000  |
| C | 0.095141000  | -12.781362000 | 8.282351000  |
| H | 0.020292000  | -10.668339000 | 5.808664000  |
| C | 4.475398000  | -13.362401000 | 1.830912000  |
| H | 3.302076000  | -12.038316000 | 0.608584000  |
| H | 5.350157000  | -14.805038000 | 3.166606000  |
| C | 5.785563000  | -12.885729000 | 1.273774000  |
| H | 6.614544000  | -13.108198000 | 1.950428000  |
| H | 6.000914000  | -13.374761000 | 0.316326000  |
| H | 5.761788000  | -11.807198000 | 1.094067000  |
| N | 0.314241000  | -14.724971000 | 7.351273000  |
| C | 0.266779000  | -13.844658000 | 6.318093000  |
| N | 0.218137000  | -14.078636000 | 8.526881000  |
| C | 0.498220000  | -16.158332000 | 7.337065000  |
| H | -0.007141000 | -12.080163000 | 9.097129000  |
| H | 1.516616000  | -16.416256000 | 7.642213000  |
| H | 0.320206000  | -16.520148000 | 6.324804000  |
| H | -0.209042000 | -16.610259000 | 8.034151000  |
| O | 0.131239000  | -10.423011000 | 2.779335000  |
| O | 4.409171000  | -9.493879000  | 0.237260000  |
| O | 0.187457000  | -9.203199000  | 4.666437000  |
| O | 3.125835000  | -7.934246000  | -0.725168000 |
| N | 0.962612000  | -7.003988000  | 3.321779000  |
| C | 1.084895000  | -8.321205000  | 1.250448000  |
| C | 0.333691000  | -8.064546000  | 2.558505000  |
| C | 2.529947000  | -8.743008000  | 1.474148000  |
| C | 0.226658000  | -9.294169000  | 3.444860000  |
| C | 3.344438000  | -8.659137000  | 0.216207000  |
| H | 1.076397000  | -7.399882000  | 0.658603000  |
| H | 0.550159000  | -9.077347000  | 0.668525000  |
| H | -0.718856000 | -7.849894000  | 2.287929000  |
| H | 2.983665000  | -8.064338000  | 2.209763000  |

|   |             |               |              |
|---|-------------|---------------|--------------|
| H | 2.603517000 | -9.753637000  | 1.886942000  |
| H | 0.657049000 | -7.062572000  | 4.287673000  |
| H | 0.695224000 | -6.098774000  | 2.954399000  |
| H | 0.079386000 | -11.196641000 | 3.420887000  |
| H | 4.879558000 | -9.331613000  | -0.594448000 |

**Adduct 7GluP<sub>b</sub>:**

|   |              |               |              |
|---|--------------|---------------|--------------|
| O | -4.184885000 | -13.672619000 | 3.479701000  |
| S | -3.546261000 | -12.385309000 | 3.193682000  |
| C | -2.092872000 | -12.349550000 | 4.209083000  |
| O | -4.255497000 | -11.122426000 | 3.365135000  |
| C | -2.895101000 | -12.433185000 | 1.542035000  |
| N | -1.269909000 | -11.306128000 | 4.128652000  |
| C | -2.631131000 | -11.234438000 | 0.882721000  |
| C | -2.622285000 | -13.661552000 | 0.948307000  |
| C | -0.367378000 | -12.718098000 | 5.571931000  |
| N | -0.240273000 | -11.523415000 | 4.944473000  |
| C | -2.065701000 | -11.277133000 | -0.384329000 |
| H | -2.870537000 | -10.289207000 | 1.358892000  |
| C | -2.059665000 | -13.683160000 | -0.322422000 |
| H | -2.857432000 | -14.579858000 | 1.476805000  |
| C | 0.172410000  | -13.638684000 | 6.495472000  |
| H | 0.498083000  | -10.815082000 | 4.911492000  |
| C | -1.765159000 | -12.497284000 | -1.001821000 |
| H | -1.841843000 | -10.350566000 | -0.905865000 |
| H | -1.841398000 | -14.637533000 | -0.794222000 |
| C | -1.155889000 | -12.518637000 | -2.373880000 |
| H | -0.664653000 | -13.472869000 | -2.580352000 |
| H | -1.924052000 | -12.369650000 | -3.141932000 |
| H | -0.420602000 | -11.716544000 | -2.484304000 |
| N | -1.689683000 | -14.475358000 | 5.770767000  |
| C | -1.562054000 | -13.289281000 | 5.121363000  |
| N | -0.641597000 | -14.681032000 | 6.588224000  |
| C | -2.715229000 | -15.487123000 | 5.655767000  |
| H | 1.077269000  | -13.599378000 | 7.083432000  |
| H | -2.343482000 | -16.345351000 | 5.088356000  |
| H | -3.571762000 | -15.054463000 | 5.139590000  |
| H | -2.998810000 | -15.816143000 | 6.656664000  |
| O | -0.794269000 | -8.980944000  | 2.865289000  |
| O | 0.416733000  | -9.098325000  | -2.059423000 |
| O | 1.108204000  | -9.294357000  | 4.020568000  |
| O | 0.577501000  | -6.889569000  | -1.742111000 |
| N | 2.420039000  | -7.489019000  | 2.515685000  |
| C | 0.427582000  | -7.233765000  | 1.099556000  |
| C | 0.971305000  | -7.427754000  | 2.516734000  |

|   |              |              |              |
|---|--------------|--------------|--------------|
| C | 0.820525000  | -8.363611000 | 0.159188000  |
| C | 0.439119000  | -8.676331000 | 3.200513000  |
| C | 0.592700000  | -8.005987000 | -1.280706000 |
| H | 0.823107000  | -6.293505000 | 0.701273000  |
| H | -0.660308000 | -7.128429000 | 1.140599000  |
| H | 0.564051000  | -6.602672000 | 3.133454000  |
| H | 1.893078000  | -8.567436000 | 0.285129000  |
| H | 0.291338000  | -9.293191000 | 0.389627000  |
| H | 2.735615000  | -7.925646000 | 3.375642000  |
| H | 2.813158000  | -6.556980000 | 2.465282000  |
| H | -1.081322000 | -9.822731000 | 3.336491000  |
| H | 0.319397000  | -8.757929000 | -2.961629000 |

**Adduct 7GluP<sub>c</sub>:**

|   |              |               |             |
|---|--------------|---------------|-------------|
| O | -4.556812000 | -10.937534000 | 6.714138000 |
| S | -3.440769000 | -10.026533000 | 6.446587000 |
| C | -2.079591000 | -11.073783000 | 6.004813000 |
| O | -2.977521000 | -9.068377000  | 7.443945000 |
| C | -3.784153000 | -9.139862000  | 4.946542000 |
| N | -0.925077000 | -10.519957000 | 5.640438000 |
| C | -3.133692000 | -7.930920000  | 4.709132000 |
| C | -4.666210000 | -9.682567000  | 4.017432000 |
| C | -0.664681000 | -12.709225000 | 5.463331000 |
| N | -0.077868000 | -11.495819000 | 5.319408000 |
| C | -3.362123000 | -7.271835000  | 3.508815000 |
| H | -2.465858000 | -7.518790000  | 5.458576000 |
| C | -4.884572000 | -9.005580000  | 2.823478000 |
| H | -5.174840000 | -10.615652000 | 4.237834000 |
| C | -0.532299000 | -14.111447000 | 5.373665000 |
| H | 0.825512000  | -11.184336000 | 4.952257000 |
| C | -4.231963000 | -7.800266000  | 2.547304000 |
| H | -2.851990000 | -6.334673000  | 3.303123000 |
| H | -5.570561000 | -9.422109000  | 2.090666000 |
| C | -4.464858000 | -7.068864000  | 1.256978000 |
| H | -4.865253000 | -7.732248000  | 0.486206000 |
| H | -5.184410000 | -6.253563000  | 1.397404000 |
| H | -3.534961000 | -6.626652000  | 0.888328000 |
| N | -2.542119000 | -13.700929000 | 6.069618000 |
| C | -1.970303000 | -12.479429000 | 5.909107000 |
| N | -1.675192000 | -14.674858000 | 5.739990000 |
| C | -3.884934000 | -14.047460000 | 6.476358000 |
| H | 0.306743000  | -14.723003000 | 5.076971000 |
| H | -4.465479000 | -14.396513000 | 5.617502000 |

|   |              |               |             |
|---|--------------|---------------|-------------|
| H | -4.357546000 | -13.160940000 | 6.898115000 |
| H | -3.834036000 | -14.843609000 | 7.220826000 |
| O | 0.349163000  | -8.193057000  | 5.196004000 |
| O | -1.130649000 | -5.285028000  | 1.315795000 |
| O | 1.807756000  | -9.700997000  | 4.389458000 |
| O | 0.569990000  | -4.021650000  | 2.034866000 |
| N | 3.142475000  | -7.802118000  | 3.025187000 |
| C | 1.488141000  | -6.132115000  | 3.742883000 |
| C | 2.305561000  | -7.367391000  | 4.126756000 |
| C | 0.563678000  | -6.382144000  | 2.560455000 |
| C | 1.450800000  | -8.542678000  | 4.571245000 |
| C | 0.038689000  | -5.104831000  | 1.972263000 |
| H | 2.180434000  | -5.325192000  | 3.480918000 |
| H | 0.917653000  | -5.791344000  | 4.611618000 |
| H | 2.876619000  | -7.104720000  | 5.038901000 |
| H | 1.130961000  | -6.900847000  | 1.775018000 |
| H | -0.277219000 | -7.030230000  | 2.825405000 |
| H | 3.422087000  | -8.765267000  | 3.179786000 |
| H | 3.976558000  | -7.230298000  | 2.968677000 |
| H | -0.178498000 | -9.012252000  | 5.447232000 |
| H | -1.355534000 | -4.417082000  | 0.947863000 |

**Adduct 7GluM:**

|   |              |               |              |
|---|--------------|---------------|--------------|
| O | -4.372635000 | -9.498625000  | 5.867962000  |
| S | -3.132536000 | -9.150601000  | 5.170843000  |
| C | -1.961515000 | -10.395292000 | 5.635482000  |
| O | -2.485822000 | -7.850036000  | 5.309768000  |
| C | -3.348568000 | -9.474610000  | 3.434338000  |
| N | -0.697645000 | -10.266851000 | 5.219772000  |
| C | -2.522618000 | -8.830279000  | 2.513801000  |
| C | -4.295029000 | -10.408581000 | 3.023745000  |
| C | -0.852243000 | -12.232721000 | 6.256754000  |
| N | -0.028424000 | -11.366618000 | 5.605500000  |
| C | -2.650062000 | -9.137970000  | 1.166602000  |
| H | -1.801332000 | -8.093131000  | 2.854982000  |
| C | -4.408492000 | -10.702992000 | 1.669788000  |
| H | -4.938088000 | -10.882352000 | 3.760936000  |
| C | -0.992287000 | -13.464243000 | 6.925744000  |
| H | 0.931640000  | -11.428637000 | 5.269163000  |
| C | -3.584445000 | -10.084022000 | 0.724269000  |
| H | -2.012871000 | -8.643025000  | 0.437448000  |
| H | -5.148817000 | -11.426961000 | 1.337009000  |
| C | -3.677674000 | -10.433077000 | -0.728235000 |
| H | -4.573373000 | -11.018309000 | -0.949243000 |
| H | -3.692643000 | -9.536750000  | -1.355932000 |

|   |              |               |              |
|---|--------------|---------------|--------------|
| H | -2.807066000 | -11.018451000 | -1.042570000 |
| N | -2.933108000 | -12.487486000 | 6.965134000  |
| C | -2.116811000 | -11.632641000 | 6.291791000  |
| N | -2.253403000 | -13.604172000 | 7.334539000  |
| C | -4.354846000 | -12.401625000 | 7.204600000  |
| H | -0.271890000 | -14.240363000 | 7.136193000  |
| H | -4.922947000 | -12.792593000 | 6.353956000  |
| H | -4.630638000 | -11.359145000 | 7.360647000  |
| H | -4.582571000 | -12.995610000 | 8.088720000  |
| O | 0.839393000  | -8.742619000  | 3.540555000  |
| O | -0.335436000 | -9.588548000  | -1.385285000 |
| O | 2.116334000  | -10.550296000 | 3.991851000  |
| O | 1.291904000  | -8.051869000  | -1.619029000 |
| N | 3.691406000  | -10.090463000 | 1.854058000  |
| C | 2.103642000  | -8.377749000  | 1.106137000  |
| C | 2.837924000  | -8.999731000  | 2.295053000  |
| C | 1.195417000  | -9.373549000  | 0.406546000  |
| C | 1.891241000  | -9.525798000  | 3.357013000  |
| C | 0.759359000  | -8.908246000  | -0.948458000 |
| H | 2.844785000  | -8.009335000  | 0.388531000  |
| H | 1.533709000  | -7.506296000  | 1.441888000  |
| H | 3.385048000  | -8.181651000  | 2.804189000  |
| H | 1.741783000  | -10.318413000 | 0.275225000  |
| H | 0.310877000  | -9.618622000  | 1.007254000  |
| H | 3.917692000  | -10.672389000 | 2.653265000  |
| H | 4.558479000  | -9.720840000  | 1.484397000  |
| H | 0.248257000  | -9.162021000  | 4.228532000  |
| H | -0.508862000 | -9.248368000  | -2.276031000 |

**Adduct 7GluM<sub>a</sub>:**

|   |              |               |             |
|---|--------------|---------------|-------------|
| O | 0.456390000  | -16.148518000 | 3.615183000 |
| S | 0.873323000  | -14.843554000 | 3.092920000 |
| C | 0.527399000  | -13.689453000 | 4.381405000 |
| O | 0.362440000  | -14.315783000 | 1.835049000 |
| C | 2.650472000  | -14.844498000 | 3.005988000 |
| N | 0.614925000  | -12.380130000 | 4.121941000 |
| C | 3.299345000  | -13.829347000 | 2.306690000 |
| C | 3.365051000  | -15.856299000 | 3.635340000 |
| C | 0.064595000  | -12.630241000 | 6.285968000 |
| N | 0.331158000  | -11.749358000 | 5.276717000 |
| C | 4.684155000  | -13.839042000 | 2.243280000 |
| H | 2.712623000  | -13.056035000 | 1.818587000 |
| C | 4.753238000  | -15.851823000 | 3.556595000 |
| H | 2.828233000  | -16.640849000 | 4.161660000 |
| C | -0.300742000 | -12.819226000 | 7.630761000 |

|   |              |               |              |
|---|--------------|---------------|--------------|
| H | 0.353354000  | -10.734371000 | 5.284188000  |
| C | 5.432436000  | -14.846938000 | 2.865020000  |
| H | 5.202106000  | -13.055569000 | 1.693508000  |
| H | 5.323161000  | -16.645610000 | 4.035263000  |
| C | 6.925793000  | -14.836458000 | 2.789497000  |
| H | 7.358779000  | -15.749147000 | 3.205258000  |
| H | 7.275995000  | -14.738042000 | 1.757449000  |
| H | 7.347090000  | -13.990610000 | 3.343351000  |
| N | -0.097879000 | -14.787854000 | 6.737037000  |
| C | 0.188207000  | -13.909420000 | 5.736897000  |
| N | -0.384620000 | -14.126056000 | 7.887547000  |
| C | -0.036148000 | -16.229311000 | 6.748184000  |
| H | -0.503361000 | -12.108053000 | 8.418835000  |
| H | 0.927431000  | -16.576716000 | 7.135337000  |
| H | -0.166132000 | -16.596210000 | 5.731552000  |
| H | -0.830216000 | -16.605136000 | 7.393654000  |
| O | -0.858899000 | -8.469031000  | 3.288027000  |
| O | 0.977524000  | -8.474162000  | -1.500243000 |
| O | 0.970681000  | -9.083140000  | 4.455020000  |
| O | 1.033414000  | -6.263567000  | -1.072360000 |
| N | 2.482107000  | -7.151200000  | 3.301174000  |
| C | 0.663268000  | -6.747181000  | 1.713724000  |
| C | 1.041553000  | -7.046016000  | 3.163307000  |
| C | 1.134040000  | -7.830023000  | 0.762206000  |
| C | 0.411530000  | -8.312041000  | 3.698717000  |
| C | 1.036745000  | -7.407643000  | -0.671970000 |
| H | 1.129307000  | -5.799956000  | 1.422284000  |
| H | -0.417557000 | -6.595608000  | 1.630316000  |
| H | 0.590024000  | -6.250546000  | 3.791466000  |
| H | 2.188751000  | -8.046492000  | 0.979291000  |
| H | 0.597174000  | -8.774410000  | 0.901688000  |
| H | 2.707687000  | -7.634342000  | 4.162969000  |
| H | 2.891013000  | -6.227444000  | 3.349128000  |
| H | -1.194131000 | -9.276181000  | 3.680279000  |
| H | 0.962673000  | -8.113939000  | -2.398881000 |

**Adduct 7GluM<sub>b</sub>:**

|   |              |               |             |
|---|--------------|---------------|-------------|
| O | -4.291066000 | -13.489515000 | 3.553507000 |
| S | -3.613483000 | -12.223704000 | 3.263217000 |
| C | -2.157117000 | -12.243733000 | 4.270944000 |
| O | -4.267723000 | -10.928723000 | 3.420187000 |
| C | -2.939428000 | -12.301392000 | 1.618778000 |
| N | -1.306089000 | -11.213812000 | 4.207519000 |
| C | -2.679629000 | -11.114636000 | 0.934756000 |
| C | -2.631286000 | -13.538122000 | 1.059741000 |

|   |              |               |              |
|---|--------------|---------------|--------------|
| C | -0.411471000 | -12.724633000 | 5.579247000  |
| N | -0.262420000 | -11.501177000 | 5.004512000  |
| C | -2.097358000 | -11.176739000 | -0.323656000 |
| H | -2.944261000 | -10.162451000 | 1.385589000  |
| C | -2.050829000 | -13.580604000 | -0.202571000 |
| H | -2.857416000 | -14.448838000 | 1.607621000  |
| C | 0.116336000  | -13.701872000 | 6.445926000  |
| H | 0.505342000  | -10.830348000 | 4.972101000  |
| C | -1.768007000 | -12.407008000 | -0.908772000 |
| H | -1.887047000 | -10.258651000 | -0.867540000 |
| H | -1.812476000 | -14.541941000 | -0.652080000 |
| C | -1.114595000 | -12.455882000 | -2.254499000 |
| H | -1.069349000 | -13.474728000 | -2.646342000 |
| H | -1.649832000 | -11.836006000 | -2.980976000 |
| H | -0.093440000 | -12.063811000 | -2.205798000 |
| N | -1.791584000 | -14.448738000 | 5.720569000  |
| C | -1.632832000 | -13.236328000 | 5.124093000  |
| N | -0.723624000 | -14.734903000 | 6.509342000  |
| C | -2.829002000 | -15.437703000 | 5.534971000  |
| H | 1.029390000  | -13.718666000 | 7.021716000  |
| H | -2.641321000 | -16.043662000 | 4.642623000  |
| H | -3.790387000 | -14.938404000 | 5.417192000  |
| H | -2.832691000 | -16.082294000 | 6.412838000  |
| O | -0.762909000 | -8.878752000  | 2.860776000  |
| O | 0.379531000  | -9.395644000  | -2.022256000 |
| O | 1.143991000  | -9.306981000  | 3.992685000  |
| O | 0.574586000  | -7.160815000  | -1.845026000 |
| N | 2.550025000  | -7.644815000  | 2.395571000  |
| C | 0.552300000  | -7.314151000  | 1.011457000  |
| C | 1.105247000  | -7.481369000  | 2.426003000  |
| C | 0.811847000  | -8.528628000  | 0.137485000  |
| C | 0.506004000  | -8.662017000  | 3.167414000  |
| C | 0.578611000  | -8.249922000  | -1.315400000 |
| H | 1.025433000  | -6.440341000  | 0.549932000  |
| H | -0.519188000 | -7.097441000  | 1.058280000  |
| H | 0.769448000  | -6.602685000  | 3.012676000  |
| H | 1.861020000  | -8.834620000  | 0.257017000  |
| H | 0.208367000  | -9.391129000  | 0.443486000  |
| H | 2.853702000  | -8.027561000  | 3.284745000  |
| H | 2.994312000  | -6.741989000  | 2.281767000  |
| H | -1.085833000 | -9.678090000  | 3.367150000  |
| H | 0.278375000  | -9.113269000  | -2.943939000 |

**Adduct 7GluM<sub>c</sub>:**

|   |              |               |             |
|---|--------------|---------------|-------------|
| O | -4.427567000 | -10.850673000 | 6.895238000 |
|---|--------------|---------------|-------------|

|   |              |               |             |
|---|--------------|---------------|-------------|
| S | -3.308063000 | -9.955909000  | 6.593161000 |
| C | -1.981925000 | -11.024223000 | 6.106946000 |
| O | -2.786159000 | -8.991412000  | 7.556161000 |
| C | -3.673968000 | -9.079830000  | 5.088516000 |
| N | -0.792507000 | -10.490561000 | 5.809390000 |
| C | -2.992838000 | -7.895805000  | 4.809617000 |
| C | -4.607610000 | -9.601748000  | 4.197953000 |
| C | -0.646865000 | -12.681363000 | 5.427135000 |
| N | 0.012422000  | -11.491085000 | 5.411240000 |
| C | -3.254035000 | -7.234857000  | 3.617117000 |
| H | -2.284303000 | -7.497005000  | 5.529590000 |
| C | -4.859438000 | -8.923024000  | 3.011506000 |
| H | -5.137462000 | -10.516509000 | 4.449277000 |
| C | -0.595685000 | -14.071516000 | 5.204087000 |
| H | 0.927859000  | -11.200568000 | 5.068191000 |
| C | -4.184307000 | -7.738637000  | 2.698470000 |
| H | -2.732929000 | -6.306981000  | 3.391395000 |
| H | -5.595223000 | -9.315806000  | 2.313649000 |
| C | -4.434938000 | -7.033618000  | 1.402088000 |
| H | -5.388423000 | -7.329853000  | 0.958036000 |
| H | -4.439553000 | -5.947074000  | 1.529823000 |
| H | -3.644690000 | -7.261725000  | 0.678798000 |
| N | -2.597915000 | -13.606627000 | 5.910363000 |
| C | -1.945808000 | -12.413590000 | 5.873731000 |
| N | -1.781985000 | -14.608344000 | 5.491316000 |
| C | -3.980625000 | -13.888587000 | 6.219896000 |
| H | 0.210535000  | -14.704870000 | 4.865908000 |
| H | -4.633380000 | -13.625429000 | 5.381390000 |
| H | -4.288322000 | -13.310374000 | 7.090905000 |
| H | -4.059368000 | -14.956263000 | 6.418546000 |
| O | 0.452538000  | -8.090517000  | 5.361191000 |
| O | -1.229029000 | -5.939636000  | 1.002895000 |
| O | 1.898700000  | -9.614193000  | 4.531492000 |
| O | 0.135202000  | -4.341698000  | 1.809627000 |
| N | 3.164323000  | -7.747011000  | 3.055527000 |
| C | 1.378048000  | -6.161286000  | 3.614214000 |
| C | 2.297585000  | -7.273140000  | 4.122014000 |
| C | 0.460193000  | -6.637473000  | 2.503228000 |
| C | 1.527454000  | -8.455040000  | 4.679713000 |
| C | -0.192510000 | -5.507085000  | 1.769226000 |
| H | 1.994579000  | -5.338339000  | 3.236161000 |
| H | 0.795722000  | -5.756096000  | 4.447412000 |
| H | 2.844608000  | -6.870608000  | 4.997354000 |
| H | 1.046802000  | -7.218250000  | 1.777930000 |
| H | -0.316123000 | -7.318438000  | 2.873994000 |
| H | 3.526774000  | -8.660032000  | 3.308605000 |

|   |              |              |             |
|---|--------------|--------------|-------------|
| H | 3.952132000  | -7.120099000 | 2.948860000 |
| H | -0.026365000 | -8.912569000 | 5.667823000 |
| H | -1.554313000 | -5.151190000 | 0.542516000 |

**Adduct 7MetB:**

|   |              |               |              |
|---|--------------|---------------|--------------|
| O | -4.437470000 | -9.411394000  | 6.336226000  |
| S | -3.993761000 | -8.699709000  | 5.124879000  |
| C | -2.355318000 | -9.288692000  | 4.773220000  |
| O | -3.968168000 | -7.222340000  | 5.098930000  |
| C | -5.011601000 | -9.240603000  | 3.752012000  |
| N | -1.691114000 | -8.725284000  | 3.763807000  |
| C | -4.999766000 | -8.515411000  | 2.557681000  |
| C | -5.811984000 | -10.371705000 | 3.904665000  |
| C | -0.295555000 | -10.145951000 | 4.768353000  |
| N | -0.456953000 | -9.251013000  | 3.745692000  |
| C | -5.799161000 | -8.946510000  | 1.503613000  |
| H | -4.383082000 | -7.628194000  | 2.465271000  |
| C | -6.608495000 | -10.784045000 | 2.837395000  |
| H | -5.819763000 | -10.902214000 | 4.850315000  |
| C | 0.569280000  | -11.043339000 | 5.438464000  |
| H | 0.226267000  | -8.727613000  | 3.173764000  |
| C | -6.610883000 | -10.085793000 | 1.622947000  |
| H | -5.800401000 | -8.385685000  | 0.572768000  |
| H | -7.242002000 | -11.659140000 | 2.952692000  |
| C | -7.451990000 | -10.553891000 | 0.460501000  |
| H | -8.267556000 | -11.202435000 | 0.791059000  |
| H | -7.885992000 | -9.709793000  | -0.083952000 |
| H | -6.847168000 | -11.124226000 | -0.255137000 |
| N | -1.346523000 | -11.105170000 | 6.469846000  |
| C | -1.517165000 | -10.214103000 | 5.451789000  |
| N | -0.083397000 | -11.610034000 | 6.451913000  |
| C | -2.307545000 | -11.608603000 | 7.436225000  |
| H | 1.602965000  | -11.294759000 | 5.252144000  |
| H | -2.743894000 | -12.554195000 | 7.096665000  |
| H | -3.098553000 | -10.869810000 | 7.561367000  |
| H | -1.787834000 | -11.775061000 | 8.380494000  |
| S | -0.865529000 | -4.539536000  | -0.790293000 |
| O | -2.392300000 | -5.778321000  | 3.217337000  |
| O | -0.547399000 | -5.906654000  | 4.510550000  |
| N | 0.877097000  | -6.990224000  | 2.493095000  |
| C | -1.034080000 | -6.714968000  | 0.944895000  |
| C | -0.259972000 | -6.113623000  | 2.130684000  |
| C | -1.905414000 | -5.719824000  | 0.170230000  |
| C | -1.075044000 | -5.930979000  | 3.418335000  |
| C | -2.152459000 | -3.364695000  | -1.334336000 |

|   |              |              |              |
|---|--------------|--------------|--------------|
| H | -0.306258000 | -7.161818000 | 0.255635000  |
| H | -1.660753000 | -7.532730000 | 1.312593000  |
| H | 0.083262000  | -5.104777000 | 1.847158000  |
| H | -2.541586000 | -5.154794000 | 0.855639000  |
| H | -2.549538000 | -6.262603000 | -0.528896000 |
| H | 1.264835000  | -6.635526000 | 3.367010000  |
| H | 1.600446000  | -6.914108000 | 1.781752000  |
| H | -2.898138000 | -3.857753000 | -1.963725000 |
| H | -1.651840000 | -2.592607000 | -1.922234000 |
| H | -2.644069000 | -2.894666000 | -0.478608000 |
| H | -2.852537000 | -5.935223000 | 4.069772000  |

**Adduct 7MetB<sub>a</sub>:**

|   |              |              |              |
|---|--------------|--------------|--------------|
| O | -5.207201000 | -6.709193000 | 6.688704000  |
| S | -3.890025000 | -6.987052000 | 6.089674000  |
| C | -3.403454000 | -5.501479000 | 5.246595000  |
| O | -3.721371000 | -8.121682000 | 5.158261000  |
| C | -2.705589000 | -7.207066000 | 7.417350000  |
| N | -2.280621000 | -5.529063000 | 4.528324000  |
| C | -1.452208000 | -7.758228000 | 7.137174000  |
| C | -3.061847000 | -6.839690000 | 8.713742000  |
| C | -3.232537000 | -3.538990000 | 4.198841000  |
| N | -2.164401000 | -4.344267000 | 3.910040000  |
| C | -0.547338000 | -7.930154000 | 8.179717000  |
| H | -1.200988000 | -8.052361000 | 6.124045000  |
| C | -2.141355000 | -7.024321000 | 9.744721000  |
| H | -4.049312000 | -6.435472000 | 8.906683000  |
| C | -3.871145000 | -2.292166000 | 3.998612000  |
| H | -1.471546000 | -4.324901000 | 3.143587000  |
| C | -0.873343000 | -7.564620000 | 9.495743000  |
| H | 0.427694000  | -8.362959000 | 7.972145000  |
| H | -2.415665000 | -6.749097000 | 10.759320000 |
| C | 0.129873000  | -7.738362000 | 10.609923000 |
| H | -0.350455000 | -7.703751000 | 11.591202000 |
| H | 0.660876000  | -8.691380000 | 10.523564000 |
| H | 0.885436000  | -6.943743000 | 10.583770000 |
| N | -5.117813000 | -3.441557000 | 5.363266000  |
| C | -4.055453000 | -4.249437000 | 5.083216000  |
| N | -4.996638000 | -2.254536000 | 4.709894000  |
| C | -6.225994000 | -3.646660000 | 6.280226000  |
| H | -3.588588000 | -1.447806000 | 3.387331000  |
| H | -6.027508000 | -3.167075000 | 7.244762000  |
| H | -6.362486000 | -4.717323000 | 6.428944000  |
| H | -7.121812000 | -3.205566000 | 5.841287000  |
| S | 2.750176000  | -8.246964000 | 2.037455000  |

|   |              |               |             |
|---|--------------|---------------|-------------|
| O | -1.520287000 | -8.267192000  | 3.354623000 |
| O | -2.590818000 | -7.037568000  | 1.794504000 |
| N | -0.548733000 | -5.278600000  | 1.680510000 |
| C | 0.786992000  | -6.668994000  | 3.232929000 |
| C | -0.230536000 | -6.669045000  | 2.079248000 |
| C | 1.556194000  | -7.982136000  | 3.416374000 |
| C | -1.578264000 | -7.332836000  | 2.393988000 |
| C | 3.248865000  | -9.968178000  | 2.385599000 |
| H | 1.505034000  | -5.858871000  | 3.052217000 |
| H | 0.265425000  | -6.423999000  | 4.162738000 |
| H | 0.196023000  | -7.241092000  | 1.238550000 |
| H | 0.865750000  | -8.828244000  | 3.453935000 |
| H | 2.114778000  | -7.952367000  | 4.357306000 |
| H | -1.331110000 | -5.324163000  | 1.028012000 |
| H | 0.244566000  | -4.881772000  | 1.182244000 |
| H | 3.724790000  | -10.051525000 | 3.366313000 |
| H | 3.972377000  | -10.252437000 | 1.618732000 |
| H | 2.392173000  | -10.645045000 | 2.332104000 |
| H | -2.433567000 | -8.437389000  | 3.670755000 |

**Adduct 7MetB<sub>6</sub>:**

|   |              |               |             |
|---|--------------|---------------|-------------|
| O | -4.206491000 | -9.805308000  | 6.532658000 |
| S | -3.676496000 | -8.843785000  | 5.550052000 |
| C | -2.115020000 | -9.494384000  | 5.008029000 |
| O | -3.478987000 | -7.428835000  | 5.927387000 |
| C | -4.744637000 | -8.867061000  | 4.110462000 |
| N | -1.380631000 | -8.749388000  | 4.181439000 |
| C | -4.628735000 | -7.857834000  | 3.151322000 |
| C | -5.690820000 | -9.882917000  | 3.982511000 |
| C | -0.167735000 | -10.543524000 | 4.715476000 |
| N | -0.215238000 | -9.385100000  | 3.988372000 |
| C | -5.473195000 | -7.883661000  | 2.045648000 |
| H | -3.898334000 | -7.066385000  | 3.278647000 |
| C | -6.529824000 | -9.887536000  | 2.869281000 |
| H | -5.775119000 | -10.639829000 | 4.754306000 |
| C | 0.581665000  | -11.684550000 | 5.088080000 |
| H | 0.527649000  | -8.803871000  | 3.566280000 |
| C | -6.431717000 | -8.896450000  | 1.883879000 |
| H | -5.394233000 | -7.099508000  | 1.297422000 |
| H | -7.276263000 | -10.670586000 | 2.768502000 |
| C | -7.321705000 | -8.924585000  | 0.665268000 |
| H | -8.246506000 | -9.475486000  | 0.856552000 |
| H | -7.586785000 | -7.914122000  | 0.340516000 |

|   |              |               |              |
|---|--------------|---------------|--------------|
| H | -6.816318000 | -9.414039000  | -0.176399000 |
| N | -1.338493000 | -11.816145000 | 6.104559000  |
| C | -1.395600000 | -10.661861000 | 5.380692000  |
| N | -0.141612000 | -12.435039000 | 5.917426000  |
| C | -2.360164000 | -12.456961000 | 6.914753000  |
| H | 1.581309000  | -11.988828000 | 4.815007000  |
| H | -2.881466000 | -13.232167000 | 6.342913000  |
| H | -3.075620000 | -11.700721000 | 7.236245000  |
| H | -1.876943000 | -12.916006000 | 7.778195000  |
| S | -0.063528000 | -3.617571000  | 0.883922000  |
| O | -1.755919000 | -5.706944000  | 4.445007000  |
| O | 0.054563000  | -6.359050000  | 5.623128000  |
| N | 1.368947000  | -7.028825000  | 3.364884000  |
| C | -0.481543000 | -6.147743000  | 1.977714000  |
| C | 0.339097000  | -5.968883000  | 3.266579000  |
| C | -1.233568000 | -4.896933000  | 1.509021000  |
| C | -0.463813000 | -6.043595000  | 4.572612000  |
| C | -1.217576000 | -2.218120000  | 0.678126000  |
| H | 0.203288000  | -6.468729000  | 1.182489000  |
| H | -1.195387000 | -6.963446000  | 2.124608000  |
| H | 0.795202000  | -4.965087000  | 3.253139000  |
| H | -1.818531000 | -4.471938000  | 2.328298000  |
| H | -1.919600000 | -5.163985000  | 0.698842000  |
| H | 1.780391000  | -6.963120000  | 4.295648000  |
| H | 2.106526000  | -6.845301000  | 2.688572000  |
| H | -1.996673000 | -2.451961000  | -0.052366000 |
| H | -0.632486000 | -1.373092000  | 0.309458000  |
| H | -1.676032000 | -1.942074000  | 1.631289000  |
| H | -2.235409000 | -6.032411000  | 5.237016000  |

**Adduct 7MetB<sub>c</sub>:**

|   |              |              |             |
|---|--------------|--------------|-------------|
| O | -6.112854000 | -7.810396000 | 5.724123000 |
| S | -4.763684000 | -7.398121000 | 5.297035000 |
| C | -4.967378000 | -6.710736000 | 3.664516000 |
| O | -3.645455000 | -8.346244000 | 5.240489000 |
| C | -4.263654000 | -6.010387000 | 6.319337000 |
| N | -3.885941000 | -6.498468000 | 2.906911000 |
| C | -2.925501000 | -5.608938000 | 6.323380000 |
| C | -5.213587000 | -5.363570000 | 7.109305000 |
| C | -5.648067000 | -5.814400000 | 1.730058000 |
| N | -4.293965000 | -5.960423000 | 1.745762000 |
| C | -2.546643000 | -4.536060000 | 7.124691000 |
| H | -2.195211000 | -6.137198000 | 5.719989000 |
| C | -4.813323000 | -4.294363000 | 7.908575000 |
| H | -6.240565000 | -5.711446000 | 7.109190000 |

|   |              |               |              |
|---|--------------|---------------|--------------|
| C | -6.793154000 | -5.408036000  | 1.003571000  |
| H | -3.548222000 | -5.770719000  | 1.068143000  |
| C | -3.480997000 | -3.859915000  | 7.924514000  |
| H | -1.506588000 | -4.221839000  | 7.136315000  |
| H | -5.546736000 | -3.793326000  | 8.534395000  |
| C | -3.062302000 | -2.680175000  | 8.767325000  |
| H | -3.719384000 | -2.552400000  | 9.631846000  |
| H | -2.036697000 | -2.791768000  | 9.130534000  |
| H | -3.102094000 | -1.751154000  | 8.185339000  |
| N | -7.481774000 | -6.160681000  | 2.928643000  |
| C | -6.123374000 | -6.285980000  | 2.962204000  |
| N | -7.877386000 | -5.620087000  | 1.746083000  |
| C | -8.468357000 | -6.437501000  | 3.959593000  |
| H | -6.885618000 | -4.993542000  | 0.010876000  |
| H | -8.709016000 | -5.529390000  | 4.522541000  |
| H | -8.063848000 | -7.189208000  | 4.636831000  |
| H | -9.373106000 | -6.806675000  | 3.475598000  |
| S | 2.684715000  | -8.862703000  | 2.112342000  |
| O | -1.172138000 | -6.826404000  | 2.664952000  |
| O | -1.726140000 | -5.858315000  | 0.704875000  |
| N | 0.865507000  | -5.369532000  | 0.109322000  |
| C | 1.565665000  | -6.315617000  | 2.270995000  |
| C | 0.584408000  | -6.425711000  | 1.083021000  |
| C | 1.769704000  | -7.595318000  | 3.089195000  |
| C | -0.886919000 | -6.324502000  | 1.472602000  |
| C | 2.479018000  | -10.305206000 | 3.212651000  |
| H | 2.529674000  | -5.989691000  | 1.863476000  |
| H | 1.234387000  | -5.512951000  | 2.938288000  |
| H | 0.679025000  | -7.445913000  | 0.664408000  |
| H | 0.809035000  | -8.014223000  | 3.396193000  |
| H | 2.349594000  | -7.367264000  | 3.989193000  |
| H | 0.074628000  | -5.288959000  | -0.524684000 |
| H | 1.678552000  | -5.626762000  | -0.443435000 |
| H | 2.938607000  | -10.126736000 | 4.188405000  |
| H | 2.984671000  | -11.146701000 | 2.734473000  |
| H | 1.422547000  | -10.553660000 | 3.342896000  |
| H | -2.159252000 | -6.780785000  | 2.838658000  |

**Adduct 7MetB6:**

|   |              |               |             |
|---|--------------|---------------|-------------|
| O | -4.367537000 | -8.652666000  | 5.019697000 |
| S | -4.130498000 | -9.135345000  | 3.655127000 |
| C | -2.758191000 | -10.269863000 | 3.764144000 |
| O | -3.869211000 | -8.164614000  | 2.572090000 |
| C | -5.526761000 | -10.126737000 | 3.131549000 |
| N | -2.586402000 | -11.185581000 | 2.816772000 |

|   |              |               |              |
|---|--------------|---------------|--------------|
| C | -5.783640000 | -10.296775000 | 1.773076000  |
| C | -6.341811000 | -10.701177000 | 4.103014000  |
| C | -0.910096000 | -11.394702000 | 4.297366000  |
| N | -1.471751000 | -11.864720000 | 3.140915000  |
| C | -6.877545000 | -11.063859000 | 1.390050000  |
| H | -5.145727000 | -9.825361000  | 1.037136000  |
| C | -7.433029000 | -11.463869000 | 3.698151000  |
| H | -6.135691000 | -10.535161000 | 5.153046000  |
| C | 0.131964000  | -11.495255000 | 5.245056000  |
| H | -1.178221000 | -12.622677000 | 2.547065000  |
| C | -7.714728000 | -11.661627000 | 2.341390000  |
| H | -7.088625000 | -11.195030000 | 0.334045000  |
| H | -8.079551000 | -11.904487000 | 4.449356000  |
| C | -8.883013000 | -12.511461000 | 1.908781000  |
| H | -9.629842000 | -12.596731000 | 2.700340000  |
| H | -9.369357000 | -12.097313000 | 1.022498000  |
| H | -8.551461000 | -13.524345000 | 1.655994000  |
| N | -1.175105000 | -9.875564000  | 5.885590000  |
| C | -1.724675000 | -10.346728000 | 4.733596000  |
| N | -0.048701000 | -10.565958000 | 6.180514000  |
| C | -1.528557000 | -8.693851000  | 6.661427000  |
| H | 0.973585000  | -12.166310000 | 5.302182000  |
| H | -2.612307000 | -8.601213000  | 6.695543000  |
| H | -1.104730000 | -7.803428000  | 6.194030000  |
| H | -1.123516000 | -8.826425000  | 7.662834000  |
| S | -0.081342000 | -2.520440000  | 0.878266000  |
| O | -1.867958000 | -6.374511000  | 2.021069000  |
| O | -0.739878000 | -7.250486000  | 3.751840000  |
| N | 1.544083000  | -5.948426000  | 3.091347000  |
| C | 0.501886000  | -5.239767000  | 0.972279000  |
| C | 0.298339000  | -5.473677000  | 2.486979000  |
| C | -0.451655000 | -4.236738000  | 0.317926000  |
| C | -0.805776000 | -6.472339000  | 2.822760000  |
| C | -1.564444000 | -1.662970000  | 0.249777000  |
| H | 1.533328000  | -4.900112000  | 0.837286000  |
| H | 0.430217000  | -6.196454000  | 0.446735000  |
| H | -0.051236000 | -4.524655000  | 2.926949000  |
| H | -1.488039000 | -4.466854000  | 0.564599000  |
| H | -0.336340000 | -4.274408000  | -0.767941000 |
| H | 1.346346000  | -6.439753000  | 3.957084000  |
| H | 2.164540000  | -5.172655000  | 3.292227000  |
| H | -1.635703000 | -1.746467000  | -0.836340000 |
| H | -1.460266000 | -0.610507000  | 0.515641000  |
| H | -2.470137000 | -2.058330000  | 0.713041000  |
| H | -2.557093000 | -7.023761000  | 2.298301000  |

**Adduct 7MetB<sub>6</sub>:**

|   |              |              |              |
|---|--------------|--------------|--------------|
| O | -5.136435000 | -6.891185000 | 6.629855000  |
| S | -3.758722000 | -7.095761000 | 6.164498000  |
| C | -3.310951000 | -5.609420000 | 5.292088000  |
| O | -3.420972000 | -8.246972000 | 5.312282000  |
| C | -2.688310000 | -7.165489000 | 7.606163000  |
| N | -2.188857000 | -5.611865000 | 4.579313000  |
| C | -1.414506000 | -7.718804000 | 7.489228000  |
| C | -3.152543000 | -6.671732000 | 8.821710000  |
| C | -3.198248000 | -3.655941000 | 4.226728000  |
| N | -2.105348000 | -4.431571000 | 3.950387000  |
| C | -0.596938000 | -7.765515000 | 8.612351000  |
| H | -1.080667000 | -8.116806000 | 6.539429000  |
| C | -2.318978000 | -6.728943000 | 9.935444000  |
| H | -4.156353000 | -6.272612000 | 8.895380000  |
| C | -3.875493000 | -2.436208000 | 4.001551000  |
| H | -1.434623000 | -4.389130000 | 3.172432000  |
| C | -1.031030000 | -7.268569000 | 9.848853000  |
| H | 0.392935000  | -8.201980000 | 8.529673000  |
| H | -2.680441000 | -6.355771000 | 10.887679000 |
| C | -0.121756000 | -7.301623000 | 11.051635000 |
| H | -0.688503000 | -7.240575000 | 11.982634000 |
| H | 0.475410000  | -8.216240000 | 11.074089000 |
| H | 0.575370000  | -6.456938000 | 11.032979000 |
| N | -5.091264000 | -3.605171000 | 5.376745000  |
| C | -4.000159000 | -4.379187000 | 5.116521000  |
| N | -5.003187000 | -2.429037000 | 4.706124000  |
| C | -6.201319000 | -3.835094000 | 6.288149000  |
| H | -3.620707000 | -1.592596000 | 3.380445000  |
| H | -6.019219000 | -3.344982000 | 7.248776000  |
| H | -6.313039000 | -4.906847000 | 6.439088000  |
| H | -7.103173000 | -3.420035000 | 5.840329000  |
| S | 2.772311000  | -8.235757000 | 1.646915000  |
| O | -1.423496000 | -8.349577000 | 3.264480000  |
| O | -2.610480000 | -7.087406000 | 1.828475000  |
| N | -0.560300000 | -5.333043000 | 1.572771000  |
| C | 0.857882000  | -6.754406000 | 3.020391000  |
| C | -0.234968000 | -6.731182000 | 1.937144000  |
| C | 1.657126000  | -8.058065000 | 3.102299000  |
| C | -1.558011000 | -7.396511000 | 2.334571000  |
| C | 3.275015000  | -9.978134000 | 1.849410000  |
| H | 1.547695000  | -5.926808000 | 2.820899000  |
| H | 0.400369000  | -6.551902000 | 3.991447000  |
| H | 0.128632000  | -7.296487000 | 1.065939000  |
| H | 0.989244000  | -8.919499000 | 3.139388000  |
| H | 2.269211000  | -8.057273000 | 4.007226000  |

|   |              |               |             |
|---|--------------|---------------|-------------|
| H | -1.367760000 | -5.343847000  | 0.952821000 |
| H | 0.215174000  | -4.928046000  | 1.056669000 |
| H | 3.799894000  | -10.127976000 | 2.794646000 |
| H | 3.954862000  | -10.209681000 | 1.028931000 |
| H | 2.411457000  | -10.643094000 | 1.793242000 |
| H | -2.298817000 | -8.537081000  | 3.658578000 |

**Adduct 7MetB6<sub>p</sub>:**

|   |              |               |              |
|---|--------------|---------------|--------------|
| O | -4.217850000 | -9.579389000  | 6.544712000  |
| S | -3.764545000 | -8.726656000  | 5.438517000  |
| C | -2.190216000 | -9.383033000  | 4.927763000  |
| O | -3.616737000 | -7.274749000  | 5.624934000  |
| C | -4.880107000 | -8.975576000  | 4.051863000  |
| N | -1.435090000 | -8.648757000  | 4.116713000  |
| C | -4.922636000 | -8.031572000  | 3.027200000  |
| C | -5.693244000 | -10.104644000 | 4.027334000  |
| C | -0.257131000 | -10.460001000 | 4.665388000  |
| N | -0.277374000 | -9.299392000  | 3.940533000  |
| C | -5.790656000 | -8.235924000  | 1.961119000  |
| H | -4.297882000 | -7.148790000  | 3.076541000  |
| C | -6.556851000 | -10.290875000 | 2.951158000  |
| H | -5.664827000 | -10.810105000 | 4.848258000  |
| C | 0.474330000  | -11.605489000 | 5.052817000  |
| H | 0.490211000  | -8.740306000  | 3.546414000  |
| C | -6.615780000 | -9.367348000  | 1.901837000  |
| H | -5.833841000 | -7.500515000  | 1.164557000  |
| H | -7.200444000 | -11.163883000 | 2.932993000  |
| C | -7.532530000 | -9.587591000  | 0.724695000  |
| H | -8.338960000 | -10.280923000 | 0.970592000  |
| H | -7.979283000 | -8.649299000  | 0.387361000  |
| H | -6.980434000 | -10.009067000 | -0.122242000 |
| N | -1.463427000 | -11.713752000 | 6.037140000  |
| C | -1.495607000 | -10.562784000 | 5.308341000  |
| N | -0.272711000 | -12.342362000 | 5.869717000  |
| C | -2.506527000 | -12.340234000 | 6.833763000  |
| H | 1.472980000  | -11.923161000 | 4.799559000  |
| H | -3.046782000 | -13.086455000 | 6.244141000  |
| H | -3.197175000 | -11.570495000 | 7.172526000  |
| H | -2.037569000 | -12.829392000 | 7.686288000  |
| S | 0.300896000  | -3.433429000  | 0.970573000  |
| O | -1.691730000 | -5.540645000  | 4.398778000  |
| O | 0.014110000  | -6.310665000  | 5.648214000  |
| N | 1.444398000  | -6.930182000  | 3.430200000  |
| C | -0.317148000 | -5.945388000  | 1.997391000  |
| C | 0.445078000  | -5.841671000  | 3.330012000  |

|   |              |              |             |
|---|--------------|--------------|-------------|
| C | -0.971831000 | -4.643871000 | 1.526496000 |
| C | -0.426481000 | -5.934085000 | 4.588365000 |
| C | -0.728448000 | -1.931499000 | 0.848868000 |
| H | 0.389020000  | -6.285141000 | 1.231428000 |
| H | -1.081006000 | -6.721566000 | 2.083609000 |
| H | 0.925931000  | -4.853110000 | 3.378027000 |
| H | -1.556851000 | -4.193541000 | 2.329110000 |
| H | -1.639732000 | -4.851053000 | 0.687209000 |
| H | 1.841092000  | -6.913938000 | 4.367676000 |
| H | 2.201307000  | -6.756739000 | 2.775373000 |
| H | -1.526219000 | -2.060892000 | 0.115273000 |
| H | -0.074025000 | -1.124191000 | 0.518769000 |
| H | -1.153688000 | -1.669576000 | 1.819225000 |
| H | -2.242089000 | -5.871577000 | 5.136338000 |

**Adduct 7MetB6<sub>c</sub>:**

|   |              |              |              |
|---|--------------|--------------|--------------|
| O | -6.188342000 | -7.348900000 | 5.223949000  |
| S | -4.753818000 | -7.129797000 | 4.999778000  |
| C | -4.628093000 | -6.271170000 | 3.445143000  |
| O | -3.819849000 | -8.266584000 | 4.971457000  |
| C | -4.163606000 | -5.983237000 | 6.251690000  |
| N | -3.428474000 | -6.156643000 | 2.884086000  |
| C | -2.796606000 | -5.887240000 | 6.505997000  |
| C | -5.084716000 | -5.213901000 | 6.956492000  |
| C | -4.915708000 | -5.306864000 | 1.457479000  |
| N | -3.592032000 | -5.559777000 | 1.695529000  |
| C | -2.354744000 | -4.996167000 | 7.477051000  |
| H | -2.097755000 | -6.511030000 | 5.963375000  |
| C | -4.622335000 | -4.328709000 | 7.926649000  |
| H | -6.144050000 | -5.325932000 | 6.762839000  |
| C | -5.885147000 | -4.800939000 | 0.562293000  |
| H | -2.799039000 | -5.639146000 | 1.046149000  |
| C | -3.255678000 | -4.200298000 | 8.197455000  |
| H | -1.292412000 | -4.922906000 | 7.684971000  |
| H | -5.337208000 | -3.735442000 | 8.486717000  |
| C | -2.758275000 | -3.218272000 | 9.228446000  |
| H | -3.536688000 | -2.970790000 | 9.952759000  |
| H | -1.897879000 | -3.614522000 | 9.772607000  |
| H | -2.441485000 | -2.284182000 | 8.751991000  |
| N | -6.941842000 | -5.493353000 | 2.334305000  |
| C | -5.624462000 | -5.736365000 | 2.584792000  |
| N | -7.089326000 | -4.918814000 | 1.113961000  |
| C | -8.101784000 | -5.670370000 | 3.193761000  |
| H | -5.781652000 | -4.379048000 | -0.424447000 |
| H | -8.330094000 | -4.744583000 | 3.729662000  |

|   |              |              |              |
|---|--------------|--------------|--------------|
| H | -7.891341000 | -6.463948000 | 3.907879000  |
| H | -8.950929000 | -5.939784000 | 2.567498000  |
| S | 2.714259000  | -7.497404000 | 2.052097000  |
| O | -1.455371000 | -8.544008000 | 3.385465000  |
| O | -2.600812000 | -8.840819000 | 1.470921000  |
| N | -1.278532000 | -6.792355000 | 0.286050000  |
| C | 0.124597000  | -6.510132000 | 2.305559000  |
| C | -0.598757000 | -7.511399000 | 1.387880000  |
| C | 1.272097000  | -7.102491000 | 3.128281000  |
| C | -1.669546000 | -8.366069000 | 2.076458000  |
| C | 3.717614000  | -8.473600000 | 3.222498000  |
| H | 0.516873000  | -5.701183000 | 1.679197000  |
| H | -0.604562000 | -6.056405000 | 2.980791000  |
| H | 0.143170000  | -8.225573000 | 1.000108000  |
| H | 0.953653000  | -8.013660000 | 3.635975000  |
| H | 1.593396000  | -6.381469000 | 3.883526000  |
| H | -1.849293000 | -7.460735000 | -0.227672000 |
| H | -0.584082000 | -6.424985000 | -0.357766000 |
| H | 3.995767000  | -7.876564000 | 4.092867000  |
| H | 4.624349000  | -8.769157000 | 2.693862000  |
| H | 3.184094000  | -9.370780000 | 3.541036000  |
| H | -2.282738000 | -8.852604000 | 3.806094000  |

**Adduct 7MetC:**

|   |              |               |             |
|---|--------------|---------------|-------------|
| O | -4.407810000 | -9.467115000  | 6.302450000 |
| S | -3.944972000 | -8.715927000  | 5.134562000 |
| C | -2.318110000 | -9.296233000  | 4.784760000 |
| O | -3.908920000 | -7.248343000  | 5.170350000 |
| C | -4.935394000 | -9.188269000  | 3.737164000 |
| N | -1.650938000 | -8.720947000  | 3.795905000 |
| C | -4.881718000 | -8.429453000  | 2.571529000 |
| C | -5.757340000 | -10.301680000 | 3.838074000 |
| C | -0.272505000 | -10.156699000 | 4.770554000 |
| N | -0.426346000 | -9.242216000  | 3.770283000 |
| C | -5.662226000 | -8.810619000  | 1.492161000 |
| H | -4.244243000 | -7.553644000  | 2.520341000 |
| C | -6.534959000 | -10.663943000 | 2.745920000 |
| H | -5.794255000 | -10.858814000 | 4.767011000 |
| C | 0.585550000  | -11.069493000 | 5.425042000 |
| H | 0.251365000  | -8.723735000  | 3.190289000 |
| C | -6.495318000 | -9.931424000  | 1.560068000 |
| H | -5.632196000 | -8.223799000  | 0.578959000 |
| H | -7.187876000 | -11.528118000 | 2.818818000 |
| C | -7.317776000 | -10.343654000 | 0.369288000 |
| H | -8.145292000 | -10.993509000 | 0.660761000 |

|   |              |               |              |
|---|--------------|---------------|--------------|
| H | -7.731823000 | -9.474647000  | -0.147942000 |
| H | -6.705776000 | -10.892149000 | -0.354408000 |
| N | -1.324590000 | -11.142696000 | 6.442841000  |
| C | -1.486762000 | -10.233619000 | 5.446064000  |
| N | -0.072160000 | -11.646263000 | 6.417629000  |
| C | -2.285284000 | -11.647998000 | 7.401128000  |
| H | 1.617436000  | -11.323438000 | 5.236119000  |
| H | -2.682269000 | -12.614695000 | 7.078975000  |
| H | -3.100677000 | -10.931572000 | 7.487519000  |
| H | -1.784766000 | -11.770288000 | 8.361354000  |
| S | -1.040460000 | -4.660436000  | -0.767617000 |
| O | -2.426492000 | -5.829531000  | 3.275408000  |
| O | -0.562258000 | -5.944681000  | 4.520793000  |
| N | 0.836496000  | -6.986614000  | 2.490579000  |
| C | -1.117099000 | -6.787866000  | 0.999960000  |
| C | -0.326220000 | -6.151722000  | 2.146865000  |
| C | -2.024723000 | -5.822669000  | 0.240541000  |
| C | -1.111006000 | -5.973721000  | 3.444603000  |
| C | -2.349782000 | -3.514544000  | -1.272052000 |
| H | -0.400364000 | -7.230169000  | 0.298307000  |
| H | -1.713965000 | -7.610895000  | 1.400241000  |
| H | -0.019472000 | -5.139481000  | 1.840433000  |
| H | -2.641896000 | -5.254477000  | 0.939265000  |
| H | -2.688182000 | -6.385740000  | -0.421741000 |
| H | 1.226269000  | -6.622713000  | 3.358021000  |
| H | 1.544416000  | -6.900694000  | 1.767579000  |
| H | -3.115805000 | -4.023338000  | -1.860978000 |
| H | -1.887394000 | -2.745192000  | -1.891718000 |
| H | -2.810919000 | -3.037224000  | -0.405009000 |
| H | -2.869048000 | -5.995436000  | 4.135151000  |

**Adduct 7MetC<sub>a</sub>:**

|   |              |              |             |
|---|--------------|--------------|-------------|
| O | -5.182017000 | -6.665045000 | 6.685324000 |
| S | -3.896539000 | -6.954053000 | 6.047596000 |
| C | -3.411515000 | -5.476917000 | 5.217850000 |
| O | -3.779042000 | -8.069691000 | 5.100111000 |
| C | -2.685416000 | -7.211809000 | 7.321897000 |
| N | -2.298120000 | -5.502737000 | 4.501250000 |
| C | -1.449703000 | -7.760640000 | 6.990660000 |
| C | -2.999792000 | -6.874769000 | 8.630563000 |
| C | -3.234077000 | -3.518283000 | 4.189325000 |
| N | -2.175590000 | -4.325593000 | 3.892012000 |
| C | -0.518440000 | -7.959803000 | 7.996704000 |
| H | -1.231605000 | -8.031434000 | 5.963444000 |
| C | -2.053337000 | -7.086784000 | 9.624833000 |

|   |              |               |              |
|---|--------------|---------------|--------------|
| H | -3.978753000 | -6.470250000  | 8.860074000  |
| C | -3.865788000 | -2.268154000  | 3.999700000  |
| H | -1.468443000 | -4.300216000  | 3.141098000  |
| C | -0.802556000 | -7.624420000  | 9.324158000  |
| H | 0.447316000  | -8.391624000  | 7.751529000  |
| H | -2.293544000 | -6.834809000  | 10.653036000 |
| C | 0.230534000  | -7.828425000  | 10.399096000 |
| H | -0.220062000 | -7.819571000  | 11.393507000 |
| H | 0.755067000  | -8.778539000  | 10.270646000 |
| H | 0.983953000  | -7.034408000  | 10.369731000 |
| N | -5.108792000 | -3.415929000  | 5.351396000  |
| C | -4.055580000 | -4.224518000  | 5.062863000  |
| N | -4.981881000 | -2.235102000  | 4.709407000  |
| C | -6.222802000 | -3.630898000  | 6.251088000  |
| H | -3.579024000 | -1.419920000  | 3.396994000  |
| H | -6.062973000 | -3.105356000  | 7.196548000  |
| H | -6.315110000 | -4.699294000  | 6.439589000  |
| H | -7.129216000 | -3.250153000  | 5.780659000  |
| S | 2.705152000  | -8.251814000  | 2.252426000  |
| O | -1.574696000 | -8.235774000  | 3.392144000  |
| O | -2.586255000 | -6.984675000  | 1.826643000  |
| N | -0.524450000 | -5.280986000  | 1.728447000  |
| C | 0.730261000  | -6.653268000  | 3.346959000  |
| C | -0.237719000 | -6.658991000  | 2.160293000  |
| C | 1.472509000  | -7.969124000  | 3.570157000  |
| C | -1.595182000 | -7.298969000  | 2.442347000  |
| C | 3.179457000  | -9.956193000  | 2.642106000  |
| H | 1.463258000  | -5.854903000  | 3.182541000  |
| H | 0.175502000  | -6.389766000  | 4.250706000  |
| H | 0.209529000  | -7.251507000  | 1.346971000  |
| H | 0.768440000  | -8.803476000  | 3.585998000  |
| H | 1.990188000  | -7.940244000  | 4.533001000  |
| H | -1.294476000 | -5.325019000  | 1.063674000  |
| H | 0.284095000  | -4.898594000  | 1.247524000  |
| H | 3.614926000  | -10.026906000 | 3.641050000  |
| H | 3.930739000  | -10.259466000 | 1.911849000  |
| H | 2.323881000  | -10.630373000 | 2.566648000  |
| H | -2.495303000 | -8.389184000  | 3.694623000  |

**Adduct 7MetC<sub>b</sub>:**

|   |              |              |             |
|---|--------------|--------------|-------------|
| O | -4.175510000 | -9.800152000 | 6.518211000 |
| S | -3.621215000 | -8.830460000 | 5.572160000 |
| C | -2.080774000 | -9.492258000 | 5.028986000 |
| O | -3.399184000 | -7.439984000 | 5.988685000 |
| C | -4.664836000 | -8.792619000 | 4.134578000 |

|   |              |               |              |
|---|--------------|---------------|--------------|
| N | -1.344130000 | -8.760329000  | 4.207048000  |
| C | -4.511010000 | -7.769403000  | 3.203642000  |
| C | -5.628594000 | -9.777922000  | 3.973918000  |
| C | -0.160359000 | -10.561643000 | 4.722351000  |
| N | -0.195299000 | -9.401684000  | 4.005521000  |
| C | -5.336966000 | -7.751445000  | 2.091409000  |
| H | -3.761897000 | -7.000586000  | 3.357991000  |
| C | -6.449134000 | -9.738899000  | 2.854166000  |
| H | -5.738928000 | -10.548352000 | 4.728203000  |
| C | 0.574082000  | -11.713719000 | 5.084523000  |
| H | 0.542509000  | -8.835077000  | 3.559327000  |
| C | -6.312921000 | -8.733624000  | 1.897391000  |
| H | -5.229829000 | -6.955314000  | 1.360708000  |
| H | -7.212252000 | -10.500083000 | 2.724969000  |
| C | -7.184499000 | -8.711355000  | 0.670941000  |
| H | -8.098668000 | -9.289488000  | 0.819768000  |
| H | -7.466033000 | -7.690484000  | 0.401570000  |
| H | -6.657777000 | -9.141282000  | -0.187474000 |
| N | -1.332149000 | -11.821331000 | 6.106437000  |
| C | -1.375971000 | -10.666554000 | 5.391697000  |
| N | -0.153254000 | -12.449109000 | 5.909546000  |
| C | -2.350039000 | -12.440295000 | 6.929493000  |
| H | 1.565889000  | -12.032522000 | 4.802285000  |
| H | -2.851213000 | -13.245267000 | 6.384900000  |
| H | -3.079151000 | -11.681389000 | 7.208794000  |
| H | -1.874466000 | -12.853793000 | 7.818642000  |
| S | -0.242651000 | -3.763889000  | 0.821489000  |
| O | -1.760890000 | -5.763344000  | 4.468222000  |
| O | 0.076341000  | -6.410681000  | 5.583850000  |
| N | 1.336108000  | -7.057646000  | 3.312596000  |
| C | -0.576642000 | -6.252657000  | 1.982410000  |
| C | 0.284722000  | -6.030227000  | 3.229099000  |
| C | -1.361403000 | -5.026249000  | 1.521681000  |
| C | -0.472477000 | -6.099356000  | 4.553338000  |
| C | -1.412933000 | -2.394073000  | 0.632798000  |
| H | 0.082530000  | -6.579102000  | 1.169718000  |
| H | -1.268074000 | -7.076045000  | 2.176693000  |
| H | 0.714000000  | -5.017272000  | 3.181820000  |
| H | -1.911905000 | -4.591820000  | 2.358551000  |
| H | -2.082282000 | -5.319255000  | 0.753294000  |
| H | 1.765967000  | -6.978237000  | 4.232235000  |
| H | 2.050573000  | -6.872947000  | 2.614942000  |
| H | -2.221765000 | -2.656525000  | -0.052371000 |
| H | -0.861611000 | -1.550920000  | 0.214690000  |
| H | -1.830992000 | -2.097098000  | 1.596762000  |
| H | -2.219154000 | -6.091515000  | 5.271264000  |

**Adduct 7MetC<sub>e</sub>:**

|   |              |              |              |
|---|--------------|--------------|--------------|
| O | -6.318193000 | -7.214822000 | 5.154529000  |
| S | -4.893464000 | -7.179501000 | 4.820777000  |
| C | -4.760354000 | -6.281129000 | 3.310354000  |
| O | -4.140465000 | -8.431721000 | 4.675189000  |
| C | -4.056840000 | -6.196820000 | 6.041963000  |
| N | -3.561262000 | -6.160700000 | 2.761285000  |
| C | -2.666885000 | -6.224927000 | 6.108478000  |
| C | -4.807870000 | -5.428027000 | 6.919860000  |
| C | -5.020797000 | -5.263105000 | 1.355645000  |
| N | -3.706018000 | -5.536961000 | 1.594204000  |
| C | -2.030627000 | -5.456230000 | 7.069823000  |
| H | -2.100840000 | -6.845210000 | 5.422232000  |
| C | -4.150584000 | -4.668282000 | 7.878578000  |
| H | -5.889740000 | -5.445152000 | 6.857151000  |
| C | -5.979640000 | -4.713239000 | 0.474702000  |
| H | -2.879927000 | -5.577445000 | 0.977736000  |
| C | -2.758648000 | -4.665975000 | 7.964228000  |
| H | -0.946835000 | -5.473805000 | 7.135134000  |
| H | -4.729905000 | -4.071309000 | 8.576070000  |
| C | -2.049665000 | -3.818514000 | 8.985719000  |
| H | -2.704902000 | -3.570263000 | 9.823134000  |
| H | -1.167359000 | -4.327225000 | 9.381431000  |
| H | -1.711030000 | -2.876727000 | 8.541214000  |
| N | -7.048761000 | -5.445362000 | 2.209831000  |
| C | -5.740575000 | -5.717795000 | 2.456471000  |
| N | -7.181869000 | -4.833326000 | 1.013857000  |
| C | -8.211980000 | -5.651034000 | 3.047246000  |
| H | -5.862069000 | -4.257258000 | -0.496503000 |
| H | -8.501237000 | -4.720370000 | 3.543185000  |
| H | -7.971747000 | -6.402896000 | 3.797242000  |
| H | -9.035561000 | -5.991475000 | 2.419974000  |
| S | 2.499593000  | -7.116742000 | 2.568275000  |
| O | -1.649844000 | -8.434538000 | 3.412238000  |
| O | -2.583575000 | -8.727873000 | 1.391814000  |
| N | -1.305520000 | -6.598146000 | 0.393423000  |
| C | -0.129925000 | -6.260503000 | 2.534467000  |
| C | -0.679174000 | -7.283596000 | 1.535881000  |
| C | 0.944692000  | -6.803885000 | 3.473857000  |
| C | -1.746725000 | -8.218458000 | 2.099114000  |
| C | 3.424880000  | -8.004216000 | 3.848136000  |
| H | 0.285162000  | -5.420493000 | 1.965631000  |
| H | -0.961070000 | -5.862953000 | 3.121813000  |
| H | 0.148241000  | -7.933823000 | 1.211604000  |

|   |              |              |              |
|---|--------------|--------------|--------------|
| H | 0.607542000  | -7.733240000 | 3.937307000  |
| H | 1.141377000  | -6.077754000 | 4.267486000  |
| H | -1.803277000 | -7.302437000 | -0.147840000 |
| H | -0.585880000 | -6.196537000 | -0.199974000 |
| H | 3.578851000  | -7.379493000 | 4.730483000  |
| H | 4.398379000  | -8.258819000 | 3.427196000  |
| H | 2.914755000  | -8.925738000 | 4.135882000  |
| H | -2.502024000 | -8.804252000 | 3.728008000  |

**Adduct 7MetP:**

|   |              |               |              |
|---|--------------|---------------|--------------|
| O | -4.407810000 | -9.467115000  | 6.302450000  |
| S | -3.944972000 | -8.715927000  | 5.134562000  |
| C | -2.318110000 | -9.296233000  | 4.784760000  |
| O | -3.908920000 | -7.248343000  | 5.170350000  |
| C | -4.935394000 | -9.188269000  | 3.737164000  |
| N | -1.650938000 | -8.720947000  | 3.795905000  |
| C | -4.881718000 | -8.429453000  | 2.571529000  |
| C | -5.757340000 | -10.301680000 | 3.838074000  |
| C | -0.272505000 | -10.156699000 | 4.770554000  |
| N | -0.426346000 | -9.242216000  | 3.770283000  |
| C | -5.662226000 | -8.810619000  | 1.492161000  |
| H | -4.244243000 | -7.553644000  | 2.520341000  |
| C | -6.534959000 | -10.663943000 | 2.745920000  |
| H | -5.794255000 | -10.858814000 | 4.767011000  |
| C | 0.585550000  | -11.069493000 | 5.425042000  |
| H | 0.251365000  | -8.723735000  | 3.190289000  |
| C | -6.495318000 | -9.931424000  | 1.560068000  |
| H | -5.632196000 | -8.223799000  | 0.578959000  |
| H | -7.187876000 | -11.528118000 | 2.818818000  |
| C | -7.317776000 | -10.343654000 | 0.369288000  |
| H | -8.145292000 | -10.993509000 | 0.660761000  |
| H | -7.731823000 | -9.474647000  | -0.147942000 |
| H | -6.705776000 | -10.892149000 | -0.354408000 |
| N | -1.324590000 | -11.142696000 | 6.442841000  |
| C | -1.486762000 | -10.233619000 | 5.446064000  |
| N | -0.072160000 | -11.646263000 | 6.417629000  |
| C | -2.285284000 | -11.647998000 | 7.401128000  |
| H | 1.617436000  | -11.323438000 | 5.236119000  |
| H | -2.682269000 | -12.614695000 | 7.078975000  |
| H | -3.100677000 | -10.931572000 | 7.487519000  |
| H | -1.784766000 | -11.770288000 | 8.361354000  |
| S | -1.040460000 | -4.660436000  | -0.767617000 |
| O | -2.426492000 | -5.829531000  | 3.275408000  |
| O | -0.562258000 | -5.944681000  | 4.520793000  |
| N | 0.836496000  | -6.986614000  | 2.490579000  |

|   |              |              |              |
|---|--------------|--------------|--------------|
| C | -1.117099000 | -6.787866000 | 0.999960000  |
| C | -0.326220000 | -6.151722000 | 2.146865000  |
| C | -2.024723000 | -5.822669000 | 0.240541000  |
| C | -1.111006000 | -5.973721000 | 3.444603000  |
| C | -2.349782000 | -3.514544000 | -1.272052000 |
| H | -0.400364000 | -7.230169000 | 0.298307000  |
| H | -1.713965000 | -7.610895000 | 1.400241000  |
| H | -0.019472000 | -5.139481000 | 1.840433000  |
| H | -2.641896000 | -5.254477000 | 0.939265000  |
| H | -2.688182000 | -6.385740000 | -0.421741000 |
| H | 1.226269000  | -6.622713000 | 3.358021000  |
| H | 1.544416000  | -6.900694000 | 1.767579000  |
| H | -3.115805000 | -4.023338000 | -1.860978000 |
| H | -1.887394000 | -2.745192000 | -1.891718000 |
| H | -2.810919000 | -3.037224000 | -0.405009000 |
| H | -2.869048000 | -5.995436000 | 4.135151000  |

**Adduct 7MetP<sub>a</sub>:**

|   |              |              |              |
|---|--------------|--------------|--------------|
| O | -5.194398000 | -6.697190000 | 6.680247000  |
| S | -3.904352000 | -6.986493000 | 6.049833000  |
| C | -3.416737000 | -5.514524000 | 5.215102000  |
| O | -3.771930000 | -8.109022000 | 5.112091000  |
| C | -2.699090000 | -7.225500000 | 7.333098000  |
| N | -2.318230000 | -5.557691000 | 4.469329000  |
| C | -1.454044000 | -7.763498000 | 7.010915000  |
| C | -3.024526000 | -6.884275000 | 8.640544000  |
| C | -3.214009000 | -3.548844000 | 4.198911000  |
| N | -2.185957000 | -4.379293000 | 3.870934000  |
| C | -0.524472000 | -7.947808000 | 8.024137000  |
| H | -1.229113000 | -8.037928000 | 5.984785000  |
| C | -2.079917000 | -7.082280000 | 9.641895000  |
| H | -4.010579000 | -6.488870000 | 8.861804000  |
| C | -3.822204000 | -2.285385000 | 4.036574000  |
| H | -1.490406000 | -4.364111000 | 3.103449000  |
| C | -0.819015000 | -7.608581000 | 9.350839000  |
| H | 0.447958000  | -8.371130000 | 7.785471000  |
| H | -2.328812000 | -6.828144000 | 10.668778000 |
| C | 0.208519000  | -7.794556000 | 10.430213000 |
| H | -0.247382000 | -7.789379000 | 11.423330000 |
| H | 0.749229000  | -8.737543000 | 10.307388000 |
| H | 0.951263000  | -6.988737000 | 10.402899000 |
| N | -5.057856000 | -3.415382000 | 5.406827000  |
| C | -4.033557000 | -4.246425000 | 5.089951000  |
| N | -4.922596000 | -2.233218000 | 4.775701000  |
| C | -6.146071000 | -3.613299000 | 6.334490000  |

|   |              |               |             |
|---|--------------|---------------|-------------|
| H | -3.534166000 | -1.436835000  | 3.433547000 |
| H | -5.933139000 | -3.127688000  | 7.292239000 |
| H | -6.278812000 | -4.683944000  | 6.491207000 |
| H | -7.050219000 | -3.177725000  | 5.907179000 |
| S | 2.695656000  | -8.190365000  | 2.211401000 |
| O | -1.570956000 | -8.272250000  | 3.352023000 |
| O | -2.601840000 | -7.033176000  | 1.785720000 |
| N | -0.571530000 | -5.296552000  | 1.704919000 |
| C | 0.700379000  | -6.646810000  | 3.325826000 |
| C | -0.261639000 | -6.666374000  | 2.136204000 |
| C | 1.470542000  | -7.945384000  | 3.538529000 |
| C | -1.608500000 | -7.331990000  | 2.408095000 |
| C | 3.189253000  | -9.892989000  | 2.561862000 |
| H | 1.416436000  | -5.829041000  | 3.172242000 |
| H | 0.135640000  | -6.404573000  | 4.231680000 |
| H | 0.203263000  | -7.253331000  | 1.324875000 |
| H | 0.783520000  | -8.796674000  | 3.553094000 |
| H | 1.994158000  | -7.910903000  | 4.499894000 |
| H | -1.338688000 | -5.358842000  | 1.037837000 |
| H | 0.230063000  | -4.903626000  | 1.221890000 |
| H | 3.634973000  | -9.981057000  | 3.556491000 |
| H | 3.939155000  | -10.171689000 | 1.818562000 |
| H | 2.340341000  | -10.576894000 | 2.477285000 |
| H | -2.488593000 | -8.440556000  | 3.646664000 |

**Adduct 7MetP<sub>b</sub>:**

|   |              |               |             |
|---|--------------|---------------|-------------|
| O | -4.170979000 | -9.799078000  | 6.538348000 |
| S | -3.629329000 | -8.824621000  | 5.588525000 |
| C | -2.086208000 | -9.470425000  | 5.037134000 |
| O | -3.420656000 | -7.429088000  | 5.996338000 |
| C | -4.676692000 | -8.804303000  | 4.153615000 |
| N | -1.349202000 | -8.714536000  | 4.230655000 |
| C | -4.530649000 | -7.785583000  | 3.213833000 |
| C | -5.637309000 | -9.797701000  | 4.002137000 |
| C | -0.159768000 | -10.524705000 | 4.699100000 |
| N | -0.202165000 | -9.348408000  | 4.014509000 |
| C | -5.360691000 | -7.779751000  | 2.101816000 |
| H | -3.784973000 | -7.010565000  | 3.362739000 |
| C | -6.462293000 | -9.769979000  | 2.883306000 |
| H | -5.740961000 | -10.563315000 | 4.764189000 |
| C | 0.576810000  | -11.681385000 | 5.033812000 |
| H | 0.535359000  | -8.764974000  | 3.580272000 |
| C | -6.333858000 | -8.769456000  | 1.916299000 |
| H | -5.259297000 | -6.987001000  | 1.364927000 |
| H | -7.223220000 | -10.536390000 | 2.762116000 |

|   |              |               |              |
|---|--------------|---------------|--------------|
| C | -7.205952000 | -8.763053000  | 0.693703000  |
| H | -8.137324000 | -9.309375000  | 0.862640000  |
| H | -7.457758000 | -7.743650000  | 0.388050000  |
| H | -6.693672000 | -9.238974000  | -0.150770000 |
| N | -1.326855000 | -11.822102000 | 6.052377000  |
| C | -1.379691000 | -10.651713000 | 5.368359000  |
| N | -0.149599000 | -12.441772000 | 5.842528000  |
| C | -2.342228000 | -12.462188000 | 6.854406000  |
| H | 1.570791000  | -11.991488000 | 4.746652000  |
| H | -2.854334000 | -13.242470000 | 6.282312000  |
| H | -3.064281000 | -11.707895000 | 7.167559000  |
| H | -1.864186000 | -12.913725000 | 7.724722000  |
| S | -0.215763000 | -3.789984000  | 0.819530000  |
| O | -1.755448000 | -5.722140000  | 4.482697000  |
| O | 0.083928000  | -6.362500000  | 5.604042000  |
| N | 1.330729000  | -7.039555000  | 3.338886000  |
| C | -0.583124000 | -6.253382000  | 2.002647000  |
| C | 0.281329000  | -6.015754000  | 3.242936000  |
| C | -1.353386000 | -5.028616000  | 1.521657000  |
| C | -0.470288000 | -6.064234000  | 4.570986000  |
| C | -1.357417000 | -2.402683000  | 0.626035000  |
| H | 0.071459000  | -6.602504000  | 1.193589000  |
| H | -1.284456000 | -7.066957000  | 2.212857000  |
| H | 0.708599000  | -4.999844000  | 3.177983000  |
| H | -1.907050000 | -4.577335000  | 2.350363000  |
| H | -2.072013000 | -5.324960000  | 0.750046000  |
| H | 1.760342000  | -6.943369000  | 4.257336000  |
| H | 2.045046000  | -6.860027000  | 2.640434000  |
| H | -2.169029000 | -2.648911000  | -0.064164000 |
| H | -0.786851000 | -1.570061000  | 0.209252000  |
| H | -1.774021000 | -2.095227000  | 1.589068000  |
| H | -2.207530000 | -6.037565000  | 5.291077000  |

**Adduct 7MetP<sub>c</sub>:**

|   |              |              |             |
|---|--------------|--------------|-------------|
| O | -6.318837000 | -7.265131000 | 5.149865000 |
| S | -4.890494000 | -7.218805000 | 4.829120000 |
| C | -4.748410000 | -6.321088000 | 3.320601000 |
| O | -4.119379000 | -8.461591000 | 4.695783000 |
| C | -4.077335000 | -6.220619000 | 6.053295000 |
| N | -3.545384000 | -6.224480000 | 2.765485000 |
| C | -2.685917000 | -6.232675000 | 6.133233000 |
| C | -4.846512000 | -5.453276000 | 6.920627000 |
| C | -4.986698000 | -5.278097000 | 1.373300000 |
| N | -3.681682000 | -5.588357000 | 1.607322000 |

|   |              |              |              |
|---|--------------|--------------|--------------|
| C | -2.066273000 | -5.450070000 | 7.097210000  |
| H | -2.107102000 | -6.852687000 | 5.455445000  |
| C | -4.205705000 | -4.680233000 | 7.882269000  |
| H | -5.928732000 | -5.484080000 | 6.846900000  |
| C | -5.935111000 | -4.699827000 | 0.502316000  |
| H | -2.853278000 | -5.643251000 | 0.987875000  |
| C | -2.812000000 | -4.660981000 | 7.981671000  |
| H | -0.981850000 | -5.455714000 | 7.172759000  |
| H | -4.798950000 | -4.085512000 | 8.571813000  |
| C | -2.124437000 | -3.799821000 | 9.001935000  |
| H | -2.785652000 | -3.566121000 | 9.840190000  |
| H | -1.229127000 | -4.287299000 | 9.397973000  |
| H | -1.807638000 | -2.848994000 | 8.557373000  |
| N | -7.015671000 | -5.418188000 | 2.233761000  |
| C | -5.716816000 | -5.724705000 | 2.477667000  |
| N | -7.141249000 | -4.794585000 | 1.046553000  |
| C | -8.174237000 | -5.596125000 | 3.076378000  |
| H | -5.813193000 | -4.240140000 | -0.467460000 |
| H | -8.418333000 | -4.667706000 | 3.602678000  |
| H | -7.959483000 | -6.379739000 | 3.803183000  |
| H | -9.018588000 | -5.882314000 | 2.448021000  |
| S | 2.491773000  | -7.041237000 | 2.519738000  |
| O | -1.608369000 | -8.475909000 | 3.401046000  |
| O | -2.542723000 | -8.779232000 | 1.379232000  |
| N | -1.314338000 | -6.617879000 | 0.394581000  |
| C | -0.151196000 | -6.258535000 | 2.537826000  |
| C | -0.674812000 | -7.288530000 | 1.534449000  |
| C | 0.950045000  | -6.777886000 | 3.455705000  |
| C | -1.718225000 | -8.253380000 | 2.091240000  |
| C | 3.444733000  | -7.962360000 | 3.748215000  |
| H | 0.229263000  | -5.396284000 | 1.975092000  |
| H | -0.989628000 | -5.895661000 | 3.140634000  |
| H | 0.173399000  | -7.917679000 | 1.212445000  |
| H | 0.646028000  | -7.722364000 | 3.916706000  |
| H | 1.139880000  | -6.052509000 | 4.253927000  |
| H | -1.792965000 | -7.336267000 | -0.145947000 |
| H | -0.601783000 | -6.204540000 | -0.198480000 |
| H | 3.610481000  | -7.368112000 | 4.650991000  |
| H | 4.413773000  | -8.191631000 | 3.299940000  |
| H | 2.948923000  | -8.900727000 | 4.011171000  |
| H | -2.449381000 | -8.867172000 | 3.711889000  |

**Adduct 7MetM:**

|   |              |              |             |
|---|--------------|--------------|-------------|
| O | -3.571079000 | -9.346092000 | 6.611910000 |
| S | -3.080645000 | -8.549726000 | 5.485548000 |

|   |              |               |              |
|---|--------------|---------------|--------------|
| C | -1.868127000 | -9.545361000  | 4.671791000  |
| O | -2.513909000 | -7.214634000  | 5.687914000  |
| C | -4.386480000 | -8.454034000  | 4.279552000  |
| N | -0.864813000 | -8.971320000  | 4.002880000  |
| C | -4.180795000 | -7.740963000  | 3.097995000  |
| C | -5.581681000 | -9.123965000  | 4.521800000  |
| C | -0.685737000 | -11.205261000 | 3.758418000  |
| N | -0.155719000 | -9.981215000  | 3.459990000  |
| C | -5.194146000 | -7.709375000  | 2.151198000  |
| H | -3.240719000 | -7.224025000  | 2.910203000  |
| C | -6.588938000 | -9.069785000  | 3.563959000  |
| H | -5.711658000 | -9.668979000  | 5.452296000  |
| C | -0.607902000 | -12.606031000 | 3.635779000  |
| H | 0.667747000  | -9.750480000  | 2.929631000  |
| C | -6.412310000 | -8.367766000  | 2.367675000  |
| H | -5.027917000 | -7.163877000  | 1.223623000  |
| H | -7.529772000 | -9.584862000  | 3.744787000  |
| C | -7.501718000 | -8.305841000  | 1.342493000  |
| H | -8.283828000 | -9.043907000  | 1.535572000  |
| H | -7.977925000 | -7.319112000  | 1.331840000  |
| H | -7.114614000 | -8.476541000  | 0.333534000  |
| N | -2.340528000 | -12.161681000 | 4.866013000  |
| C | -1.808760000 | -10.952031000 | 4.546494000  |
| N | -1.620610000 | -13.164722000 | 4.301622000  |
| C | -3.564478000 | -12.460976000 | 5.572159000  |
| H | 0.106115000  | -13.234865000 | 3.124960000  |
| H | -4.423973000 | -12.444098000 | 4.893530000  |
| H | -3.713591000 | -11.720075000 | 6.358633000  |
| H | -3.469987000 | -13.456654000 | 6.003351000  |
| S | -2.066942000 | -7.196098000  | 0.148845000  |
| O | -1.397103000 | -5.917186000  | 3.469888000  |
| O | -1.184992000 | -3.719953000  | 3.940584000  |
| N | -0.522904000 | -3.122259000  | 1.390231000  |
| C | -0.048220000 | -5.470953000  | 0.989755000  |
| C | -1.012337000 | -4.467282000  | 1.645050000  |
| C | -0.445099000 | -6.938455000  | 0.949849000  |
| C | -1.185864000 | -4.634410000  | 3.144697000  |
| C | -2.236532000 | -8.962635000  | 0.482337000  |
| H | 0.110067000  | -5.114245000  | -0.035786000 |
| H | 0.926658000  | -5.380397000  | 1.483172000  |
| H | -2.024423000 | -4.662528000  | 1.235523000  |
| H | -0.501331000 | -7.362375000  | 1.956325000  |
| H | 0.305344000  | -7.496299000  | 0.374992000  |
| H | -0.881431000 | -2.507911000  | 2.114201000  |
| H | -0.874120000 | -2.789034000  | 0.501234000  |
| H | -1.402302000 | -9.528874000  | 0.055732000  |

|   |              |              |             |
|---|--------------|--------------|-------------|
| H | -3.162673000 | -9.304834000 | 0.016569000 |
| H | -2.297820000 | -9.156566000 | 1.558615000 |
| H | -1.585339000 | -6.011595000 | 4.423236000 |

**Adduct 7MetM<sub>a</sub>:**

|   |              |              |              |
|---|--------------|--------------|--------------|
| O | -5.147734000 | -6.602881000 | 6.806725000  |
| S | -3.918365000 | -6.902937000 | 6.070084000  |
| C | -3.377594000 | -5.383697000 | 5.357969000  |
| O | -3.918332000 | -7.927753000 | 5.014865000  |
| C | -2.638397000 | -7.328566000 | 7.226880000  |
| N | -2.166150000 | -5.345275000 | 4.798158000  |
| C | -1.435060000 | -7.853938000 | 6.753338000  |
| C | -2.856106000 | -7.128675000 | 8.585435000  |
| C | -3.186472000 | -3.413486000 | 4.341820000  |
| N | -2.037341000 | -4.140478000 | 4.213305000  |
| C | -0.438980000 | -8.168156000 | 7.665313000  |
| H | -1.291586000 | -8.008068000 | 5.686603000  |
| C | -1.847452000 | -7.460776000 | 9.483968000  |
| H | -3.808339000 | -6.731816000 | 8.923856000  |
| C | -3.863852000 | -2.209075000 | 4.068479000  |
| H | -1.287862000 | -4.084173000 | 3.506073000  |
| C | -0.626515000 | -7.976799000 | 9.041646000  |
| H | 0.503318000  | -8.578969000 | 7.308124000  |
| H | -2.009826000 | -7.318938000 | 10.549966000 |
| C | 0.464728000  | -8.314387000 | 10.009729000 |
| H | 0.121482000  | -8.252651000 | 11.044975000 |
| H | 0.852176000  | -9.324273000 | 9.842736000  |
| H | 1.314766000  | -7.631496000 | 9.903025000  |
| N | -5.208270000 | -3.445932000 | 5.241557000  |
| C | -4.072965000 | -4.181445000 | 5.103070000  |
| N | -5.077627000 | -2.243979000 | 4.620004000  |
| C | -6.396907000 | -3.726701000 | 6.012013000  |
| H | -3.561470000 | -1.340199000 | 3.503021000  |
| H | -6.277990000 | -3.408932000 | 7.052949000  |
| H | -6.594814000 | -4.798162000 | 5.995834000  |
| H | -7.224907000 | -3.179115000 | 5.563080000  |
| S | 2.567565000  | -8.169059000 | 2.439438000  |
| O | -1.682761000 | -8.010662000 | 3.320529000  |
| O | -2.601674000 | -6.415637000 | 2.011425000  |
| N | -0.355100000 | -4.959101000 | 2.018614000  |
| C | 0.679204000  | -6.530748000 | 3.600920000  |
| C | -0.221978000 | -6.379652000 | 2.370851000  |
| C | 1.332458000  | -7.894592000 | 3.755224000  |
| C | -1.635536000 | -6.915835000 | 2.547502000  |
| C | 2.910168000  | -9.917541000 | 2.729318000  |

|   |              |               |             |
|---|--------------|---------------|-------------|
| H | 1.463840000  | -5.765354000  | 3.537415000 |
| H | 0.094986000  | -6.298067000  | 4.498730000 |
| H | 0.221760000  | -6.973081000  | 1.548752000 |
| H | 0.583437000  | -8.691777000  | 3.707222000 |
| H | 1.833138000  | -7.959497000  | 4.728156000 |
| H | -1.087998000 | -4.887406000  | 1.316623000 |
| H | 0.507374000  | -4.639250000  | 1.591012000 |
| H | 3.326689000  | -10.081993000 | 3.727177000 |
| H | 3.646948000  | -10.236097000 | 1.990384000 |
| H | 2.008238000  | -10.523581000 | 2.606567000 |
| H | -2.619302000 | -8.167716000  | 3.558341000 |

**Adduct 7MetM<sub>b</sub>:**

|   |              |               |              |
|---|--------------|---------------|--------------|
| O | -4.215488000 | -9.923155000  | 6.371604000  |
| S | -3.661192000 | -8.909420000  | 5.472298000  |
| C | -2.111537000 | -9.541755000  | 4.923835000  |
| O | -3.463750000 | -7.531195000  | 5.945521000  |
| C | -4.659224000 | -8.831884000  | 4.005342000  |
| N | -1.452676000 | -8.906812000  | 3.951551000  |
| C | -4.478069000 | -7.787211000  | 3.098478000  |
| C | -5.610668000 | -9.822707000  | 3.788817000  |
| C | -0.112155000 | -10.503687000 | 4.755816000  |
| N | -0.256892000 | -9.512897000  | 3.826136000  |
| C | -5.265806000 | -7.751862000  | 1.956717000  |
| H | -3.730905000 | -7.021613000  | 3.294044000  |
| C | -6.396182000 | -9.763066000  | 2.643269000  |
| H | -5.731851000 | -10.617009000 | 4.519072000  |
| C | 0.703854000  | -11.520152000 | 5.291306000  |
| H | 0.457380000  | -8.951875000  | 3.338167000  |
| C | -6.237388000 | -8.732544000  | 1.712559000  |
| H | -5.131858000 | -6.944963000  | 1.238879000  |
| H | -7.147891000 | -10.528847000 | 2.466868000  |
| C | -7.099139000 | -8.659518000  | 0.490095000  |
| H | -7.602507000 | -9.608872000  | 0.292279000  |
| H | -7.876944000 | -7.895508000  | 0.600014000  |
| H | -6.518750000 | -8.391219000  | -0.397396000 |
| N | -1.177023000 | -11.572604000 | 6.375140000  |
| C | -1.311454000 | -10.567945000 | 5.470016000  |
| N | 0.047803000  | -12.152851000 | 6.264923000  |
| C | -2.133397000 | -12.088373000 | 7.326383000  |
| H | 1.711782000  | -11.820508000 | 5.046113000  |
| H | -2.943746000 | -12.621430000 | 6.820910000  |
| H | -2.570512000 | -11.272013000 | 7.902939000  |
| H | -1.597090000 | -12.772700000 | 7.981834000  |
| S | -0.383571000 | -3.792571000  | 0.939394000  |

|   |              |              |             |
|---|--------------|--------------|-------------|
| O | -1.770294000 | -5.876137000 | 4.477551000 |
| O | 0.032347000  | -6.794439000 | 5.481836000 |
| N | 1.277305000  | -7.167426000 | 3.136448000 |
| C | -0.710091000 | -6.339377000 | 1.939972000 |
| C | 0.196875000  | -6.171301000 | 3.162460000 |
| C | -1.500097000 | -5.096984000 | 1.559042000 |
| C | -0.510159000 | -6.332560000 | 4.499674000 |
| C | -1.543357000 | -2.410466000 | 0.906297000 |
| H | -0.081250000 | -6.637592000 | 1.090799000 |
| H | -1.398765000 | -7.172325000 | 2.121522000 |
| H | 0.587279000  | -5.135748000 | 3.155569000 |
| H | -2.048971000 | -4.708563000 | 2.423110000 |
| H | -2.228292000 | -5.341515000 | 0.777051000 |
| H | 1.741724000  | -7.129309000 | 4.041306000 |
| H | 1.959493000  | -6.899169000 | 2.435224000 |
| H | -2.367028000 | -2.595368000 | 0.210981000 |
| H | -0.995926000 | -1.529603000 | 0.567479000 |
| H | -1.946375000 | -2.208336000 | 1.902641000 |
| H | -2.213687000 | -6.190297000 | 5.291582000 |

**Adduct 7MetM<sub>c</sub>:**

|   |              |              |             |
|---|--------------|--------------|-------------|
| O | -6.346974000 | -7.147741000 | 5.193918000 |
| S | -4.928980000 | -7.191348000 | 4.829724000 |
| C | -4.784506000 | -6.312843000 | 3.308967000 |
| O | -4.229105000 | -8.475695000 | 4.690060000 |
| C | -4.013951000 | -6.205548000 | 5.992068000 |
| N | -3.563437000 | -6.145561000 | 2.795157000 |
| C | -2.621932000 | -6.293781000 | 6.026521000 |
| C | -4.705791000 | -5.350842000 | 6.843222000 |
| C | -5.033775000 | -5.332594000 | 1.325980000 |
| N | -3.713108000 | -5.532156000 | 1.609489000 |
| C | -1.925198000 | -5.504178000 | 6.929947000 |
| H | -2.102799000 | -6.972528000 | 5.353839000 |
| C | -3.988428000 | -4.571594000 | 7.744343000 |
| H | -5.790150000 | -5.316448000 | 6.801123000 |
| C | -5.990776000 | -4.837630000 | 0.418657000 |
| H | -2.878264000 | -5.565188000 | 1.004139000 |
| C | -2.593440000 | -4.631446000 | 7.799644000 |
| H | -0.839800000 | -5.568335000 | 6.972084000 |
| H | -4.519846000 | -3.907021000 | 8.421709000 |
| C | -1.822496000 | -3.776201000 | 8.756991000 |
| H | -2.473428000 | -3.319124000 | 9.505958000 |
| H | -1.053906000 | -4.351077000 | 9.282328000 |
| H | -1.304476000 | -2.964377000 | 8.234260000 |
| N | -7.074464000 | -5.602137000 | 2.137613000 |

|   |              |              |              |
|---|--------------|--------------|--------------|
| C | -5.760950000 | -5.808906000 | 2.421893000  |
| N | -7.213537000 | -5.003251000 | 0.924870000  |
| C | -8.241038000 | -5.828326000 | 2.957930000  |
| H | -5.874460000 | -4.391934000 | -0.558024000 |
| H | -8.456110000 | -4.959540000 | 3.588506000  |
| H | -8.067971000 | -6.692104000 | 3.599004000  |
| H | -9.088675000 | -6.006668000 | 2.296812000  |
| S | 2.386112000  | -6.982371000 | 2.757935000  |
| O | -1.679282000 | -8.470853000 | 3.465235000  |
| O | -2.640988000 | -8.670133000 | 1.430847000  |
| N | -1.278946000 | -6.570632000 | 0.469540000  |
| C | -0.254728000 | -6.200998000 | 2.680260000  |
| C | -0.722963000 | -7.237893000 | 1.655734000  |
| C | 0.813279000  | -6.700310000 | 3.640092000  |
| C | -1.796968000 | -8.191282000 | 2.157772000  |
| C | 3.276514000  | -7.898024000 | 4.033783000  |
| H | 0.133880000  | -5.333031000 | 2.131253000  |
| H | -1.121826000 | -5.843649000 | 3.246638000  |
| H | 0.145223000  | -7.875625000 | 1.401354000  |
| H | 0.500654000  | -7.638977000 | 4.109556000  |
| H | 0.979266000  | -5.963541000 | 4.434039000  |
| H | -1.729160000 | -7.288712000 | -0.093850000 |
| H | -0.518514000 | -6.187100000 | -0.081766000 |
| H | 3.412752000  | -7.295748000 | 4.936516000  |
| H | 4.260323000  | -8.147402000 | 3.633235000  |
| H | 2.758114000  | -8.826291000 | 4.289721000  |
| H | -2.510163000 | -8.901407000 | 3.748915000  |

**Adduct 7AlaB-N:**

|   |              |              |              |
|---|--------------|--------------|--------------|
| O | 1.803532000  | -2.784255000 | 0.478665000  |
| S | 0.893819000  | -1.764401000 | 1.038002000  |
| C | 1.449790000  | -0.216983000 | 0.361546000  |
| O | 0.716190000  | -1.644602000 | 2.492101000  |
| C | -0.732082000 | -2.019735000 | 0.314791000  |
| N | 0.629690000  | 0.837912000  | 0.342554000  |
| C | -1.867658000 | -1.715641000 | 1.061486000  |
| C | -0.835895000 | -2.551888000 | -0.972344000 |
| C | 2.595886000  | 1.493618000  | -0.495611000 |
| N | 1.320926000  | 1.866980000  | -0.178595000 |
| C | -3.127091000 | -1.941181000 | 0.499930000  |
| H | -1.759809000 | -1.320154000 | 2.064974000  |
| C | -2.097521000 | -2.763411000 | -1.519366000 |
| H | 0.061459000  | -2.803022000 | -1.527454000 |
| C | 3.850917000  | 1.875699000  | -1.027734000 |
| H | 0.805330000  | 2.756623000  | -0.312363000 |

|   |              |              |              |
|---|--------------|--------------|--------------|
| C | -3.262067000 | -2.463119000 | -0.794870000 |
| H | -4.017866000 | -1.728679000 | 1.086458000  |
| H | -2.182674000 | -3.175000000 | -2.521438000 |
| C | -4.623303000 | -2.726027000 | -1.391836000 |
| H | -4.699242000 | -2.316904000 | -2.404549000 |
| H | -4.817606000 | -3.802580000 | -1.463778000 |
| H | -5.420077000 | -2.286051000 | -0.786484000 |
| N | 3.994728000  | -0.227944000 | -0.488750000 |
| C | 2.723208000  | 0.141260000  | -0.156039000 |
| N | 4.675398000  | 0.829691000  | -1.006153000 |
| C | 4.691410000  | -1.481340000 | -0.251716000 |
| H | 4.189971000  | 2.823907000  | -1.418417000 |
| H | 5.307577000  | -1.708980000 | -1.123227000 |
| H | 3.951215000  | -2.265015000 | -0.094440000 |
| H | 5.335494000  | -1.404045000 | 0.630425000  |
| O | -2.827485000 | 1.415871000  | 0.678934000  |
| O | -2.177922000 | 2.090595000  | -1.376004000 |
| N | -0.576408000 | 4.016302000  | -0.332150000 |
| C | -1.620958000 | 3.458604000  | 0.542506000  |
| C | -2.742440000 | 4.449333000  | 0.907057000  |
| C | -2.213024000 | 2.251048000  | -0.174845000 |
| H | -1.150871000 | 3.093010000  | 1.460959000  |
| H | -3.480354000 | 3.979376000  | 1.563024000  |
| H | -2.324938000 | 5.314681000  | 1.431992000  |
| H | -3.253435000 | 4.805217000  | 0.006235000  |
| H | -0.354034000 | 4.968012000  | -0.051462000 |
| H | -0.937820000 | 4.041859000  | -1.285130000 |
| H | -3.113322000 | 0.635285000  | 0.171008000  |

**Adduct 7LysP-N:**

|   |              |               |             |
|---|--------------|---------------|-------------|
| O | -3.821433000 | -10.035908000 | 4.609686000 |
| S | -2.546410000 | -9.447708000  | 4.182205000 |
| C | -1.295654000 | -10.531326000 | 4.818614000 |
| O | -2.202194000 | -8.073586000  | 4.533549000 |
| C | -2.411479000 | -9.627639000  | 2.421839000 |
| N | -0.050777000 | -10.410844000 | 4.375917000 |
| C | -1.419775000 | -8.927493000  | 1.737897000 |
| C | -3.289530000 | -10.476527000 | 1.756886000 |
| C | -0.065548000 | -12.034728000 | 5.908367000 |
| N | 0.684094000  | -11.314522000 | 5.028231000 |
| C | -1.298566000 | -9.097351000  | 0.365214000 |
| H | -0.755459000 | -8.263474000  | 2.280838000 |
| C | -3.163315000 | -10.625399000 | 0.380515000 |
| H | -4.058873000 | -10.998241000 | 2.316822000 |
| C | -0.113984000 | -13.054268000 | 6.881351000 |

|   |              |               |              |
|---|--------------|---------------|--------------|
| H | 1.665029000  | -11.385248000 | 4.793847000  |
| C | -2.169145000 | -9.946694000  | -0.329920000 |
| H | -0.508599000 | -8.575736000  | -0.174306000 |
| H | -3.846836000 | -11.282893000 | -0.150663000 |
| C | -2.048852000 | -10.101770000 | -1.819274000 |
| H | -2.459666000 | -11.056019000 | -2.159672000 |
| H | -2.594654000 | -9.305399000  | -2.339046000 |
| H | -1.004857000 | -10.042485000 | -2.139217000 |
| N | -2.119651000 | -12.268968000 | 6.676414000  |
| C | -1.369788000 | -11.550773000 | 5.801026000  |
| N | -1.360023000 | -13.167869000 | 7.325446000  |
| C | -3.520189000 | -12.142703000 | 7.010659000  |
| H | 0.662034000  | -13.695082000 | 7.273481000  |
| H | -3.997913000 | -13.121902000 | 6.938707000  |
| H | -3.979466000 | -11.448156000 | 6.307537000  |
| H | -3.630004000 | -11.765121000 | 8.030830000  |
| O | 4.792064000  | -7.212157000  | -2.775253000 |
| O | 3.006613000  | -7.966145000  | -3.904824000 |
| N | 1.403080000  | -7.865443000  | -1.630681000 |
| N | 3.773206000  | -11.138320000 | 3.746591000  |
| C | 3.027221000  | -8.867247000  | 0.771466000  |
| C | 3.444791000  | -8.887046000  | -0.693624000 |
| C | 3.569189000  | -10.056911000 | 1.556602000  |
| C | 2.843289000  | -7.725750000  | -1.501184000 |
| C | 3.244261000  | -9.974219000  | 3.042098000  |
| C | 3.525029000  | -7.649111000  | -2.859216000 |
| H | 1.933224000  | -8.843500000  | 0.831470000  |
| H | 3.385682000  | -7.934296000  | 1.229827000  |
| H | 3.130997000  | -9.830461000  | -1.161794000 |
| H | 4.537518000  | -8.844225000  | -0.770262000 |
| H | 4.657459000  | -10.135923000 | 1.441010000  |
| H | 3.147031000  | -10.985508000 | 1.145453000  |
| H | 3.065822000  | -6.792577000  | -0.968701000 |
| H | 2.159912000  | -9.819353000  | 3.165731000  |
| H | 3.733702000  | -9.088655000  | 3.464968000  |
| H | 1.228234000  | -8.520751000  | -2.390171000 |
| H | 1.007283000  | -6.986147000  | -1.949406000 |
| H | 3.314332000  | -12.003792000 | 3.487743000  |
| H | 3.790546000  | -11.033202000 | 4.753050000  |
| H | 5.148331000  | -7.230506000  | -3.676241000 |

**Adduct 7GluB-αN:**

|   |              |              |             |
|---|--------------|--------------|-------------|
| O | -3.535225000 | -2.284938000 | 0.894247000 |
| S | -2.962716000 | -1.002116000 | 1.319356000 |
| C | -1.297180000 | -1.007849000 | 0.736599000 |

|   |              |              |              |
|---|--------------|--------------|--------------|
| O | -2.967942000 | -0.596166000 | 2.720635000  |
| C | -3.765852000 | 0.278919000  | 0.380311000  |
| N | -0.484585000 | -0.011466000 | 1.081901000  |
| C | -3.629741000 | 1.605797000  | 0.781764000  |
| C | -4.524339000 | -0.063112000 | -0.733190000 |
| C | 0.671699000  | -1.402262000 | -0.217093000 |
| N | 0.692585000  | -0.248898000 | 0.506981000  |
| C | -4.261153000 | 2.597982000  | 0.045195000  |
| H | -3.041307000 | 1.844478000  | 1.661576000  |
| C | -5.152848000 | 0.944529000  | -1.456485000 |
| H | -4.625274000 | -1.107332000 | -1.010758000 |
| C | 1.385888000  | -2.316090000 | -1.024266000 |
| H | 1.460987000  | 0.411906000  | 0.702316000  |
| C | -5.031378000 | 2.284990000  | -1.081440000 |
| H | -4.159481000 | 3.636430000  | 0.350198000  |
| H | -5.750827000 | 0.685005000  | -2.326242000 |
| C | -5.734331000 | 3.367622000  | -1.849544000 |
| H | -5.984124000 | 3.042730000  | -2.862821000 |
| H | -6.670388000 | 3.651426000  | -1.354297000 |
| H | -5.119299000 | 4.269333000  | -1.921424000 |
| N | -0.624371000 | -3.088479000 | -0.803817000 |
| C | -0.615875000 | -1.926818000 | -0.099720000 |
| N | 0.579268000  | -3.313459000 | -1.364581000 |
| C | -1.714676000 | -3.996166000 | -1.070399000 |
| H | 2.414846000  | -2.313807000 | -1.356259000 |
| H | -2.141800000 | -3.809617000 | -2.061182000 |
| H | -2.482931000 | -3.849028000 | -0.311502000 |
| H | -1.331706000 | -5.017020000 | -1.034980000 |
| O | 4.688543000  | 3.192851000  | -1.033495000 |
| O | 5.030308000  | -2.011026000 | -1.184151000 |
| O | 2.494321000  | 3.433289000  | -0.634623000 |
| O | 6.513295000  | -1.114539000 | 0.241313000  |
| N | 2.546617000  | 1.755442000  | 1.460336000  |
| C | 4.850195000  | 1.096464000  | 0.814096000  |
| C | 3.834859000  | 2.229356000  | 0.968724000  |
| C | 4.407475000  | 0.010034000  | -0.150692000 |
| C | 3.574604000  | 2.997852000  | -0.314942000 |
| C | 5.444209000  | -1.067713000 | -0.316751000 |
| H | 5.035642000  | 0.654765000  | 1.799134000  |
| H | 5.803637000  | 1.517510000  | 0.485602000  |
| H | 4.289550000  | 2.978003000  | 1.642273000  |
| H | 3.486936000  | -0.474289000 | 0.190784000  |
| H | 4.187233000  | 0.415899000  | -1.145904000 |
| H | 1.858739000  | 2.496571000  | 1.346926000  |
| H | 2.605600000  | 1.534788000  | 2.449107000  |
| H | 4.430895000  | 3.732379000  | -1.796284000 |

|   |             |              |              |
|---|-------------|--------------|--------------|
| H | 5.734193000 | -2.675220000 | -1.226135000 |
|---|-------------|--------------|--------------|

**Adduct 7MetB-αN:**

|   |              |              |              |
|---|--------------|--------------|--------------|
| O | 3.595948000  | 1.238269000  | 1.803289000  |
| S | 2.509417000  | 0.270973000  | 1.558272000  |
| C | 1.375570000  | 1.104826000  | 0.466259000  |
| O | 1.743400000  | -0.317691000 | 2.662351000  |
| C | 3.189968000  | -1.076118000 | 0.584793000  |
| N | 0.198155000  | 0.537777000  | 0.186742000  |
| C | 2.533022000  | -2.307973000 | 0.569437000  |
| C | 4.374976000  | -0.882315000 | -0.124527000 |
| C | 0.290637000  | 2.481092000  | -0.919048000 |
| N | -0.453138000 | 1.369413000  | -0.645715000 |
| C | 3.072011000  | -3.350971000 | -0.178495000 |
| H | 1.629111000  | -2.443494000 | 1.152767000  |
| C | 4.899740000  | -1.938508000 | -0.867020000 |
| H | 4.884790000  | 0.073349000  | -0.072360000 |
| C | 0.370978000  | 3.723027000  | -1.592280000 |
| H | -1.388444000 | 1.097910000  | -0.951490000 |
| C | 4.256806000  | -3.183037000 | -0.911513000 |
| H | 2.570731000  | -4.315195000 | -0.187144000 |
| H | 5.828009000  | -1.796475000 | -1.413683000 |
| C | 4.815425000  | -4.314061000 | -1.740354000 |
| H | 5.886511000  | -4.188239000 | -1.920048000 |
| H | 4.662594000  | -5.281156000 | -1.252121000 |
| H | 4.322046000  | -4.363285000 | -2.718932000 |
| N | 2.222035000  | 3.472396000  | -0.473285000 |
| C | 1.494067000  | 2.345843000  | -0.216093000 |
| N | 1.541015000  | 4.295232000  | -1.314646000 |
| C | 3.570308000  | 3.827841000  | -0.063420000 |
| H | -0.337779000 | 4.220699000  | -2.237417000 |
| H | 4.300004000  | 3.534961000  | -0.826206000 |
| H | 3.799576000  | 3.316263000  | 0.870422000  |
| H | 3.610120000  | 4.909415000  | 0.069924000  |
| S | -6.308410000 | -0.071427000 | 0.034786000  |
| O | -3.832354000 | -1.721676000 | -2.125775000 |
| O | -2.950512000 | 0.214375000  | -1.428641000 |
| N | -2.517576000 | -0.857121000 | 1.206726000  |
| C | -4.515095000 | -2.218457000 | 0.674889000  |
| C | -3.169915000 | -1.637029000 | 0.174849000  |
| C | -5.513032000 | -1.209901000 | 1.254197000  |
| C | -3.311309000 | -0.926363000 | -1.177155000 |
| C | -5.516969000 | 1.532711000  | 0.419590000  |
| H | -4.985990000 | -2.790987000 | -0.129616000 |
| H | -4.264396000 | -2.921718000 | 1.477207000  |

|   |              |              |              |
|---|--------------|--------------|--------------|
| H | -2.533963000 | -2.505333000 | -0.043741000 |
| H | -5.047360000 | -0.607279000 | 2.038974000  |
| H | -6.331954000 | -1.760750000 | 1.725011000  |
| H | -2.935432000 | 0.065062000  | 1.285121000  |
| H | -1.528932000 | -0.709790000 | 1.009680000  |
| H | -5.604858000 | 1.767354000  | 1.483224000  |
| H | -6.066985000 | 2.287348000  | -0.147331000 |
| H | -4.472117000 | 1.554612000  | 0.102802000  |
| H | -3.899813000 | -1.189735000 | -2.937155000 |

**Adduct 7LysP-αN:**

|   |              |               |              |
|---|--------------|---------------|--------------|
| O | -4.817873000 | -11.106972000 | 4.246975000  |
| S | -3.956370000 | -9.925516000  | 4.374976000  |
| C | -2.308052000 | -10.548231000 | 4.466176000  |
| O | -4.152909000 | -8.955663000  | 5.446628000  |
| C | -4.024390000 | -9.045252000  | 2.829251000  |
| N | -1.304931000 | -9.704426000  | 4.699476000  |
| C | -3.523580000 | -7.746745000  | 2.761423000  |
| C | -4.589956000 | -9.658717000  | 1.717818000  |
| C | -0.434370000 | -11.741723000 | 4.499299000  |
| N | -0.183434000 | -10.421766000 | 4.717767000  |
| C | -3.588903000 | -7.064445000  | 1.555043000  |
| H | -3.098457000 | -7.286926000  | 3.647629000  |
| C | -4.650248000 | -8.957487000  | 0.518268000  |
| H | -4.987896000 | -10.664339000 | 1.807166000  |
| C | 0.085478000  | -13.049344000 | 4.385029000  |
| H | 0.705760000  | -9.926404000  | 4.911546000  |
| C | -4.152741000 | -7.655929000  | 0.417648000  |
| H | -3.201177000 | -6.050708000  | 1.492662000  |
| H | -5.095591000 | -9.427899000  | -0.354558000 |
| C | -4.243728000 | -6.891912000  | -0.872441000 |
| H | -4.424520000 | -7.557106000  | -1.720543000 |
| H | -5.065944000 | -6.167633000  | -0.839179000 |
| H | -3.325819000 | -6.329779000  | -1.068803000 |
| N | -2.057139000 | -13.189905000 | 4.124793000  |
| C | -1.812597000 | -11.867954000 | 4.322114000  |
| N | -0.910572000 | -13.895304000 | 4.153923000  |
| C | -3.299924000 | -13.863084000 | 3.830536000  |
| H | 1.098959000  | -13.414863000 | 4.462871000  |
| H | -3.397900000 | -14.045261000 | 2.755311000  |
| H | -4.123986000 | -13.234316000 | 4.167092000  |
| H | -3.307543000 | -14.819174000 | 4.355578000  |
| O | 5.417027000  | -8.328089000  | 6.663866000  |
| O | 3.827604000  | -6.809417000  | 6.208741000  |
| N | 2.053979000  | -8.736158000  | 5.328636000  |

|   |             |               |             |
|---|-------------|---------------|-------------|
| N | 4.390983000 | -13.498597000 | 1.174455000 |
| C | 3.483576000 | -11.030310000 | 3.938727000 |
| C | 4.131579000 | -9.747429000  | 4.447304000 |
| C | 4.243038000 | -11.648772000 | 2.770427000 |
| C | 3.417188000 | -9.130091000  | 5.655527000 |
| C | 3.620351000 | -12.949374000 | 2.280932000 |
| C | 4.216894000 | -7.952996000  | 6.196107000 |
| H | 2.449672000 | -10.829087000 | 3.633650000 |
| H | 3.429975000 | -11.754518000 | 4.764587000 |
| H | 4.166358000 | -9.001279000  | 3.640251000 |
| H | 5.170802000 | -9.945534000  | 4.730241000 |
| H | 5.285453000 | -11.846463000 | 3.048232000 |
| H | 4.277122000 | -10.929948000 | 1.938711000 |
| H | 3.378727000 | -9.883495000  | 6.453764000 |
| H | 2.553091000 | -12.774654000 | 2.051163000 |
| H | 3.641551000 | -13.681434000 | 3.098918000 |
| H | 2.089036000 | -8.022794000  | 4.602914000 |
| H | 1.644828000 | -8.259175000  | 6.129070000 |
| H | 4.287469000 | -12.903050000 | 0.358260000 |
| H | 4.020588000 | -14.405371000 | 0.910109000 |
| H | 5.854317000 | -7.522767000  | 6.978886000 |

**Adduct 7GluB-C:**

|   |              |               |              |
|---|--------------|---------------|--------------|
| O | -5.502826000 | -10.163757000 | 5.326092000  |
| S | -4.253903000 | -9.377576000  | 5.280061000  |
| C | -2.989650000 | -10.452716000 | 5.921663000  |
| O | -4.171922000 | -8.069656000  | 5.943945000  |
| C | -3.819963000 | -9.138611000  | 3.553858000  |
| N | -1.701207000 | -10.192470000 | 5.678501000  |
| C | -2.893911000 | -8.152005000  | 3.211278000  |
| C | -4.429676000 | -9.927034000  | 2.578824000  |
| C | -1.797334000 | -11.978720000 | 7.026157000  |
| N | -0.986301000 | -11.118911000 | 6.341157000  |
| C | -2.568459000 | -7.967362000  | 1.868646000  |
| H | -2.443463000 | -7.540767000  | 3.984881000  |
| C | -4.099783000 | -9.724730000  | 1.238695000  |
| H | -5.156726000 | -10.676329000 | 2.872074000  |
| C | -1.888958000 | -13.108908000 | 7.872886000  |
| H | 0.033161000  | -11.106398000 | 6.272031000  |
| C | -3.168251000 | -8.746286000  | 0.861018000  |
| H | -1.837144000 | -7.213932000  | 1.592496000  |
| H | -4.576120000 | -10.331958000 | 0.473929000  |
| C | -2.820527000 | -8.507030000  | -0.588159000 |
| H | -3.140803000 | -9.339033000  | -1.220939000 |
| H | -3.312213000 | -7.600141000  | -0.959731000 |

|   |              |               |              |
|---|--------------|---------------|--------------|
| H | -1.742214000 | -8.367058000  | -0.710392000 |
| N | -3.921042000 | -12.451196000 | 7.452546000  |
| C | -3.115091000 | -11.578586000 | 6.779056000  |
| N | -3.171674000 | -13.368210000 | 8.121153000  |
| C | -5.362955000 | -12.435763000 | 7.636088000  |
| H | -1.116485000 | -13.731052000 | 8.300132000  |
| H | -5.728687000 | -13.463297000 | 7.602404000  |
| H | -5.809009000 | -11.845733000 | 6.836513000  |
| H | -5.624185000 | -11.994949000 | 8.603743000  |
| O | -0.259676000 | -10.376519000 | 1.836667000  |
| O | 3.928039000  | -11.220142000 | 5.228661000  |
| O | 0.571743000  | -8.597926000  | 0.725466000  |
| O | 1.886539000  | -11.236914000 | 6.140422000  |
| N | 3.135184000  | -9.364210000  | 1.216124000  |
| C | 2.279044000  | -11.134698000 | 2.716144000  |
| C | 2.089003000  | -10.364125000 | 1.393783000  |
| C | 2.196317000  | -10.215667000 | 3.951152000  |
| C | 0.734696000  | -9.664106000  | 1.286090000  |
| C | 2.613699000  | -10.924227000 | 5.210671000  |
| H | 3.265552000  | -11.609233000 | 2.683786000  |
| H | 1.531628000  | -11.930115000 | 2.784724000  |
| H | 2.064150000  | -11.122454000 | 0.588216000  |
| H | 2.863973000  | -9.364023000  | 3.783173000  |
| H | 1.176226000  | -9.852794000  | 4.094748000  |
| H | 2.799679000  | -8.635378000  | 0.591834000  |
| H | 3.964881000  | -9.781473000  | 0.807037000  |
| H | -1.084795000 | -9.859823000  | 1.750179000  |
| H | 4.097829000  | -11.685773000 | 6.065595000  |
